# Supplementary material for: Enantioselective synthesis of cyclic carbamimidates via a three-component reaction of imines, terminal alkynes, and p-toluenesulfonylisocyanate using a monophosphine gold(i) catalyst
Source: Royal Society of Chemistry journal article supplement (doi:10.1039/c1sc00160d), 2011-01-01
Supplement: c1sc00160d.pdf [file c1sc00160d.pdf]

## Supporting Information

### Enantioselective Synthesis of Cyclic Carbamimidates via a Three-Component Reaction of Imines, Terminal Alkynes, and *p*-Toluenesulfonylisocyanate using a Monophosphine Gold(I) Catalyst

Matthew J. Campbell and F. Dean Toste\*

*Department of Chemistry, University of California, Berkeley, California 94720*

[fdtoste@berkeley.edu](mailto:fdtoste@berkeley.edu)

#### Table of Contents

|                                                                                                                                                    |                |
|----------------------------------------------------------------------------------------------------------------------------------------------------|----------------|
| <b>General Methods</b>                                                                                                                             | <b>S1-S2</b>   |
| <b>General Procedure (A) for the racemic multicomponent reaction using Ph<sub>3</sub>PAuNTf<sub>2</sub></b>                                        | <b>S2</b>      |
| <b>General Procedure (B) for the asymmetric multicomponent reaction using 5 mol % (<i>S,S</i>)-L4AuCl/AgNTf<sub>2</sub></b>                        | <b>S2</b>      |
| <b>General Procedure (C) for the asymmetric multicomponent reaction using 10 mol % (<i>R,R</i>)-L4AuCl/AgNTf<sub>2</sub></b>                       | <b>S2-S3</b>   |
| <b>General Procedure (D) for the asymmetric multicomponent reaction using 10 mol % (<i>R,R</i>)-L4AuCl/AgNTf<sub>2</sub></b>                       | <b>S3</b>      |
| <b>Compound preparation (9aA-9tA)</b>                                                                                                              | <b>S3-S21</b>  |
| <b>General methods for preparing <i>N</i>-substituted 2-(diphenylphosphino)cyclohexanamines and their corresponding gold(I) complexes (L1-L21)</b> | <b>S21-S23</b> |
| <b>General scheme for the preparation of gold(I) complexes (L22-L37)</b>                                                                           | <b>S24</b>     |
| <b>Procedure for the preparation of gold(I) complexes from L22-L37</b>                                                                             | <b>S24-S29</b> |
| <b>General procedure for screening catalysts: the asymmetric addition of phenylacetylene to (<i>E</i>)-<i>N</i>-benzylideneaniline</b>             | <b>S30</b>     |
| <b>References</b>                                                                                                                                  | <b>S30</b>     |
| <b><sup>1</sup>H NMR, <sup>13</sup>C NMR, <sup>19</sup>F NMR Spectra and HPLC traces</b>                                                           | <b>S30-S82</b> |

#### Experimental Section

**Materials and Methods: General.** Unless otherwise noted commercial materials were used without further purification. Reagent grade solvents were used in all gold(I)-catalyzed reactions without the exclusion of air or moisture. Gold(I)-catalyzed reactions were conducted in amber glass 1 dram vials fitted with a PTFE-lined threaded cap (Thermo Scientific catalog No. B7800-2A). All other reactions were conducted in flame-dried glassware under an inert (N<sub>2</sub>) atmosphere with magnetic stirring and dried solvent, unless otherwise noted. Solvents were dried by passage through an activated alumina column under nitrogen. Thin-layer chromatography (TLC) analysis was performed using Merck silica gel 60 F254 TLC plates, and visualized by staining UV and/or cerium sulfate. Flash column chromatography was carried out on Merck 60 silica gel (32–63 μm). <sup>1</sup>H, <sup>13</sup>C, <sup>19</sup>F and <sup>31</sup>P NMR spectra were recorded with Bruker AVB-400, AVQ-400, and DRX-500 spectrometers and chemical shifts are reported in ppm, relative to CHCl<sub>3</sub> (7.26 ppm for <sup>1</sup>H, and 77.0 ppm for <sup>13</sup>C) or *d*<sub>6</sub>-DMSO (2.50 ppm for <sup>1</sup>H, and 39.5 ppm for <sup>13</sup>C) unless otherwise noted. <sup>1</sup>H NMR data are reported as follows: chemical shift, multiplicity (s = singlet, br s = broad singlet, d = doublet, br d = broad doublet, t =

triplet, q = quartet, m = multiplet), coupling constants (Hz), and integration. Mass spectra were recorded at the University of California, Berkeley Microanalytical Facility with electrospray ionization (ESI) in positive mode. Infrared spectral data were recorded on a Thermo Scientific Nicolet iS10 spectrometer fitted with a Smart iTR device as neat solids or thin films. Yield refers to isolated yield of analytically pure material unless otherwise noted. Liquid benzaldehydes were purified by the following procedure. The neat aldehydes were washed sequentially with a 1 M sodium hydroxide solution and a saturated aqueous sodium bicarbonate solution, dried with magnesium sulfate, and distilled under reduced pressure. 4-Chlorobenzaldehyde was sublimed under reduced pressure. 3-Naphthaldehyde was used without prior purification. All other reagents were obtained from Acros or Sigma-Aldrich and used without further purification.  $\text{Ph}_3\text{PAuNTf}_2$  was either prepared immediately before use by sonicating a 1:1 mixture of  $\text{Ph}_3\text{PAuCl}$  and  $\text{AgNTf}_2$  in the desired solvent and filtering off the precipitated  $\text{AgCl}$  through a glass microfiber plug or was prepared and isolated as reported by Gagosz.<sup>1</sup>

**General Procedure (A) for the racemic multicomponent reaction using  $\text{Ph}_3\text{PAuNTf}_2$ .**

An amber vial was charged with the imine (0.28 mmol), alkyne, and isocyanate in reagent grade chloroform (0.90 mL). A solution of  $\text{Ph}_3\text{PAuNTf}_2$  in chloroform (0.40 mL) was added quickly and the vial was sealed with a PTFE-lined screw cap (imine molarity  $\sim 0.2$  M). The reaction was left to stand at the indicated temperature (room temperature, 35 °C or 50 °C) for the indicated time period.  $^1\text{H}$  NMR analysis of the crude reaction mixture provided the diastereomeric ratio. The reaction mixture was then either directly loaded on silica and purified via flash chromatography, eluting with the indicated solvent system, or evaporated and recrystallized.

**General Procedure (B) for the asymmetric multicomponent reaction using 5 mol % (*S,S*)- $\text{L4AuCl/AgNTf}_2$ .**

An amber vial was charged with the imine (0.14 mmol), alkyne (0.17 mmol), and isocyanate (0.17 mmol) in reagent grade solvent (0.10 mL, chloroform or toluene). In a separate amber vial was added (*S,S*)- $\text{L4AuCl}$  (0.0058 g, 0.007 mmol),  $\text{AgNTf}_2$  (0.0027 g, 0.007 mmol), and reagent grade solvent (0.20 mL). This mixture was sonicated for 30 seconds and then filtered through glass microfiber to afford a colorless solution of the catalyst. (In practice, the catalyst was made on at least two times this scale to ensure 0.20 mL of the catalyst solution could be added to the reaction to overcome loss of material during the filtration step) The catalyst solution (0.20 mL) was added quickly to the first vial, which was then sealed with a PTFE-lined screw cap (imine molarity  $\sim 0.4$  M). The reaction was left to stand at room temperature for the indicated time period. For reactions where water was added after the completion of the alkyne addition to facilitate the cyclization, water (1.2  $\mu\text{L}$ , 0.07 mmol) was shaken with chloroform (0.20 mL). This solution was then added to the reaction mixture after the imine was completely consumed, as judged by TLC analysis.  $^1\text{H}$  NMR analysis of the crude reaction mixture provided the diastereomeric ratio. The reaction mixture was then directly loaded on silica and purified via flash chromatography, eluting with the indicated solvent system.

**General Procedure (C) for the asymmetric multicomponent reaction using 10 mol % (*R,R*)-L4AuCl/AgNTf<sub>2</sub>.**

An amber vial was charged with the imine (0.061 mmol), alkyne (0.12 mmol), and isocyanate (0.12 mmol) in reagent grade chloroform (0.40 mL). In a separate amber vial was added (*R,R*)-L4AuCl (0.0051 g, 0.006 mmol), AgNTf<sub>2</sub> (0.0024 g, 0.006 mmol), and reagent grade chloroform (0.20 mL). This mixture was sonicated for 30 seconds and then filtered through glass microfiber to afford a colorless solution of the catalyst. (In practice, the catalyst was made on at least two times this scale to ensure 0.20 mL of the catalyst solution could be added to the reaction to overcome loss of material during the filtration step) The catalyst solution (0.20 mL) was added quickly to the first vial, which was then sealed with a PTFE-lined screw cap (imine molarity ~0.2 M). The reaction was left to stand at room temperature for the indicated time period. <sup>1</sup>H NMR analysis of the crude reaction mixture provided the diastereomeric ratio. The reaction mixture was then directly loaded on silica and purified via flash chromatography, eluting with the indicated solvent system.

**General Procedure (D) for the asymmetric multicomponent reaction using 10 mol % (*R,R*)-L4AuCl/AgNTf<sub>2</sub>.**

An amber vial was charged with the imine (0.061 mmol), alkyne (0.073 mmol), and isocyanate (0.073 mmol) in reagent grade methylene chloride (0.15 mL). In a separate amber vial was added (*R,R*)-L4AuCl (0.0051 g, 0.006 mmol), AgNTf<sub>2</sub> (0.0024 g, 0.006 mmol), and reagent grade methylene chloride (0.10 mL). This mixture was sonicated for 30 seconds and then filtered through glass microfiber to afford a colorless solution of the catalyst. (In practice, the catalyst was made on at least two times this scale to ensure 0.10 mL of the catalyst solution could be added to the reaction to overcome loss of material during the filtration step) The catalyst solution (0.10 mL) was added quickly to the first vial, which was then sealed with a PTFE-lined screw cap (imine molarity ~0.2 M). The reaction was left to stand at room temperature for the indicated time period. <sup>1</sup>H NMR analysis of the crude reaction mixture provided the diastereomeric ratio. The reaction mixture was then directly loaded on silica and purified via flash chromatography, eluting with the indicated solvent system.

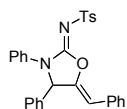

**(*Z*)-*N*-((*Z*)-5-benzylidene-3,4-diphenyloxazolidin-2-ylidene)-4-methylbenzenesulfonamide (9aA).** The title compound was prepared according to General Procedure A using (*E*)-*N*-benzylideneaniline (0.051 g, 0.28 mmol), phenylacetylene (0.035 g, 36 μL, 0.34 mmol), *p*-toluenesulfonyl isocyanate (0.067 g, 52 μL, 0.34 mmol), and Ph<sub>3</sub>PAuNTf<sub>2</sub> (0.0104 g, 0.014 mmol) in chloroform. After 20 h at 35 °C, <sup>1</sup>H NMR analysis of the crude mixture gave the diastereomeric ratio: 17:1. The title compound (0.113 g, 0.24 mmol, 84% yield) was isolated as a white solid after flash chromatography, eluting with a gradient from 25 to 30% ethyl

acetate/hexanes. Analytical data for the title compound: **IR** (thin film,  $\text{cm}^{-1}$ ) 1611, 1587, 1080, 773, 698, 681, 659;  **$^1\text{H NMR}$**  (400 MHz,  $\text{CDCl}_3$ , 298 K)  $\delta$  7.93 (d,  $J = 8.4$  Hz, 2H), 7.61 (d,  $J = 7.6$  Hz, 2H), 7.39 (t,  $J = 7.8$  Hz, 2H), 7.35–7.15 (m, 12H), 7.15–7.10 (m, 1H), 5.92 (d,  $J = 2.0$  Hz, 1H), 5.44 (d,  $J = 2.0$  Hz, 1H), 2.37 (s, 3H);  **$^{13}\text{C NMR}$**  (100 MHz,  $\text{CDCl}_3$ , 298 K)  $\delta$  153.2, 146.9, 142.7, 139.7, 136.3, 134.6, 132.2, 129.5, 129.3, 129.2, 129.1, 128.8, 128.6, 127.8, 127.6, 127.0, 126.8, 124.1, 107.0, 66.3, 21.5; **TLC** (30% EtOAc/hexanes)  $R_f$  0.34; **HRMS** (ESI) calc for  $[\text{C}_{29}\text{H}_{24}\text{O}_3\text{N}_2\text{S}+\text{Na}]^+$ :  $m/z$  503.1400, found 503.1397.

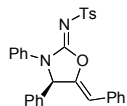

**(Z)-N-((R,Z)-5-benzylidene-3,4-diphenyloxazolidin-2-ylidene)-4-methylbenzenesulfonamide ((R)-9aA).**

The title compound was prepared according to General Procedure B using (*E*)-*N*-benzylideneaniline (0.026 g, 0.14 mmol), phenylacetylene (0.017 g, 18  $\mu\text{L}$ , 0.17 mmol), *p*-toluenesulfonyl isocyanate (0.033 g, 25  $\mu\text{L}$ , 0.17 mmol), (*S,S*)-**L4**AuCl (0.0058 g, 0.007 mmol), and  $\text{AgNTf}_2$  (0.0027 g, 0.007 mmol) in chloroform. After 4 h the wet chloroform solution was added. After an additional 36 h,  $^1\text{H NMR}$  analysis of the crude mixture gave the diastereomeric ratio: 8:1. The title compound (0.051 g, 0.106 mmol, 76% yield, 79% ee) was isolated as a white solid after flash chromatography, eluting with a gradient from 25 to 30% ethyl acetate/hexanes. Analytical data for the title compound: **HPLC** (Chiral Technology Chiral Pak IA, hexane/IPA= 65:35, flow rate=1 ml/min)  $T_R$  (major) 13.0 min,  $T_R$  (minor) 18.1 min.

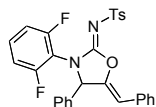

**(Z)-N-((Z)-5-benzylidene-3-(2,6-difluorophenyl)-4-phenyloxazolidin-2-ylidene)-4-**

**methylbenzenesulfonamide (9bA).** The title compound was prepared according to General Procedure A using (*E*)-*N*-benzylidene-2,6-difluoroaniline (0.061 g, 0.28 mmol), phenylacetylene (0.035 g, 36  $\mu\text{L}$ , 0.34 mmol), *p*-toluenesulfonyl isocyanate (0.067 g, 52  $\mu\text{L}$ , 0.34 mmol), and  $\text{Ph}_3\text{PAuNTf}_2$  (0.0104 g, 0.014 mmol) in chloroform. After 6 days at room temperature,  $^1\text{H NMR}$  analysis of the crude mixture gave the diastereomeric ratio: 2.4:1. The title compound (0.080 g, 0.15 mmol, 55% yield) was isolated as a white solid after flash chromatography, eluting with a gradient from 25 to 30% ethyl acetate/hexanes. Analytical data for the title compound: **IR** (thin film,  $\text{cm}^{-1}$ ) 1627, 1609, 1591, 1241, 933, 885;  **$^1\text{H NMR}$**  (400 MHz,  $\text{CDCl}_3$ , 298 K)  $\delta$  7.92 (d,  $J = 8.3$  Hz, 2H), 7.59 (d,  $J = 7.4$  Hz, 2H), 7.40 (t,  $J = 7.6$  Hz, 2H), 7.36–7.17 (m, 9H), 6.91 (t,  $J = 9.4$  Hz, 1H), 6.81 (t,  $J = 8.9$  Hz, 1H), 5.92 (d,  $J = 2.2$  Hz, 1H), 5.42 (d,  $J = 2.2$  Hz, 1H), 2.37 (s, 3H);  **$^{13}\text{C NMR}$**  (100 MHz,  $\text{CDCl}_3$ , 298 K)  $\delta$  158.8 (dd,  $J = 260.0, 3.3$  Hz), 158.6 (dd,  $J = 260.0, 4.4$  Hz), 153.3, 147.7, 142.7, 139.3, 135.0, 132.0, 130.6 (t,  $J = 9.9$  Hz), 129.9, 129.2, 129.1, 128.8, 128.6, 128.3, 127.9, 126.8, 112.6 (dd,  $J = 20.4, 3.1$  Hz), 111.9 (dd,  $J = 19.6, 3.2$  Hz), 111.1 (t,  $J = 15.9$  Hz), 107.6, 66.0 (d,  $J = 4.0$  Hz), 21.5;  **$^{19}\text{F NMR}$**

(376 MHz, CDCl<sub>3</sub>, 298 K)  $\delta$  112.52 (t,  $J$  = 7.3 Hz, 1F), 116.53 (t,  $J$  = 7.8 Hz, 1F); **TLC** (30% EtOAc/hexanes)  $R_f$  0.26; **HRMS** (ESI) calc for [C<sub>29</sub>H<sub>22</sub>O<sub>3</sub>N<sub>2</sub>F<sub>2</sub>S+H]<sup>+</sup>:  $m/z$  517.1392, found 517.1391.

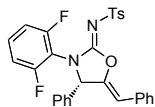

**(Z)-N-((S,Z)-5-benzylidene-3-(2,6-difluorophenyl)-4-phenyloxazolidin-2-ylidene)-4-**

**methylbenzenesulfonamide ((S)-9bA).** The title compound was prepared according to General Procedure D using (*E*)-*N*-benzylidene-2,6-difluoroaniline (0.013 g, 0.061 mmol), phenylacetylene (0.0075 g, 0.073 mmol), *p*-toluenesulfonyl isocyanate (0.0144 g, 0.073 mmol), (*R,R*)-**L4**AuCl (0.0050 g, 0.006 mmol), and AgNTf<sub>2</sub> (0.0024 g, 0.006 mmol) in methylene chloride. After 6 days, <sup>1</sup>H NMR analysis of the crude mixture gave the diastereomeric ratio: 1.7:1. The title compound (0.015 g, 0.030 mmol, 48% yield, 41% ee) was isolated as a white solid after flash chromatography, eluting with a gradient from 25 to 30% ethyl acetate/hexanes. Analytical data for the title compound: **HPLC** (Chiral Technology Chiral Pak IB, hexane/IPA= 75:25, flow rate=1 ml/min)  $T_R$  (major) 14.2 min,  $T_R$  (minor) 15.4 min.

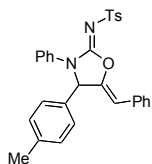

**(Z)-N-((Z)-5-benzylidene-3-phenyl-4-(*p*-tolyl)oxazolidin-2-ylidene)-4-methylbenzenesulfonamide (9cA).**

The title compound was prepared according to General Procedure A using (*E*)-*N*-(4-methylbenzylidene)aniline (0.055 g, 0.28 mmol), phenylacetylene (0.035 g, 36  $\mu$ L, 0.34 mmol), *p*-toluenesulfonyl isocyanate (0.067 g, 52  $\mu$ L, 0.34 mmol), and Ph<sub>3</sub>PAuNTf<sub>2</sub> (0.0104 g, 0.014 mmol) in chloroform. After 20 h at 35 °C, <sup>1</sup>H NMR analysis of the crude mixture gave the diastereomeric ratio: >20:1. The title compound (0.111 g, 0.22 mmol, 80% yield) was isolated as a white solid after flash chromatography, eluting with a gradient from 25 to 30% ethyl acetate/hexanes. Analytical data for the title compound: **IR** (thin film, cm<sup>-1</sup>) 1615, 1584, 1085, 769, 692, 663; **<sup>1</sup>H NMR** (400 MHz, CDCl<sub>3</sub>, 298 K)  $\delta$  7.97 (d,  $J$  = 8.0 Hz, 2H), 7.64 (d,  $J$  = 7.6 Hz, 2H), 7.41 (t,  $J$  = 7.6 Hz, 2H), 7.35–7.20 (m, 7H), 7.20–7.10 (m, 5H), 5.91 (d,  $J$  = 2.0 Hz, 1H), 5.46 (d,  $J$  = 2.0 Hz, 1H), 2.38 (s, 3H), 2.32 (s, 3H); **<sup>13</sup>C NMR** (100 MHz, CDCl<sub>3</sub>, 298 K)  $\delta$  153.2, 147.2, 142.6, 139.6, 139.4, 134.5, 133.2, 132.2, 129.9, 129.1, 129.0, 128.7, 128.5, 127.7, 127.5, 126.9, 126.7, 124.1, 106.7, 66.0, 21.4, 21.1; **TLC** (30% EtOAc/hexanes)  $R_f$  0.37; **HRMS** (ESI) calc for [C<sub>30</sub>H<sub>26</sub>O<sub>3</sub>N<sub>2</sub>S+Na]<sup>+</sup>:  $m/z$  517.1556, found 517.1552.

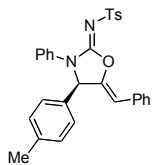

**(Z)-N-((R,Z)-5-benzylidene-3-phenyl-4-(*p*-tolyl)oxazolidin-2-ylidene)-4-methylbenzenesulfonamide ((R)-9cA).** The title compound was prepared according to General Procedure B using (*E*)-*N*-(4-methylbenzylidene)aniline (0.028 g, 0.14 mmol), phenylacetylene (0.017 g, 18  $\mu$ L, 0.17 mmol), *p*-toluenesulfonyl isocyanate (0.033 g, 25  $\mu$ L, 0.17 mmol), (*S,S*)-**L4**AuCl (0.0058 g, 0.007 mmol), and AgNTf<sub>2</sub> (0.0027 g, 0.007 mmol) in chloroform. After 4 h the wet chloroform solution was added. After an additional 36 h, <sup>1</sup>H NMR analysis of the crude mixture gave the diastereomeric ratio: 11:1. The title compound (0.053 g, 0.106 mmol, 76% yield, 80% ee) was isolated as a white solid after flash chromatography, eluting with a gradient from 25 to 30% ethyl acetate/hexanes. Analytical data for the title compound: **HPLC** (Chiral Technology Chiral Pak IA, hexane/IPA= 65:35, flow rate=1 ml/min) T<sub>R</sub> (major) 11.6 min, T<sub>R</sub> (minor) 16.2 min.

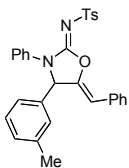

**(Z)-N-((Z)-5-benzylidene-3-phenyl-4-(*m*-tolyl)oxazolidin-2-ylidene)-4-methylbenzenesulfonamide (9dA).** The title compound was prepared according to General Procedure A using (*E*)-*N*-(3-methylbenzylidene)aniline (0.055 g, 0.28 mmol), phenylacetylene (0.035 g, 36  $\mu$ L, 0.34 mmol), *p*-toluenesulfonyl isocyanate (0.067 g, 52  $\mu$ L, 0.34 mmol), and Ph<sub>3</sub>PAuNTf<sub>2</sub> (0.0104 g, 0.014 mmol) in chloroform. After 20 h at 35 °C, <sup>1</sup>H NMR analysis of the crude mixture gave the diastereomeric ratio: >20:1. The title compound (0.115 g, 0.23 mmol, 83% yield) was isolated as a white solid after flash chromatography, eluting with a gradient from 25 to 30% ethyl acetate/hexanes. Analytical data for the title compound: **IR** (thin film, cm<sup>-1</sup>) 1616, 1583, 1157, 1086, 681, 666; **<sup>1</sup>H NMR** (400 MHz, CDCl<sub>3</sub>, 298 K)  $\delta$  7.93 (d, *J* = 8.4 Hz, 2H), 7.65 (d, *J* = 7.6 Hz, 2H), 7.41 (t, *J* = 7.8 Hz, 2H), 7.35–7.20 (m, 8H), 7.20–7.10 (m, 2H), 7.10–7.05 (m, 2H), 5.89 (d, *J* = 2.0 Hz, 1H), 5.47 (d, *J* = 2.0 Hz, 1H), 2.38 (s, 3H), 2.32 (s, 3H); **<sup>13</sup>C NMR** (100 MHz, CDCl<sub>3</sub>, 298 K)  $\delta$  153.2, 147.0, 142.6, 139.6, 139.2, 136.3, 134.6, 132.2, 130.2, 129.1, 129.1, 129.0, 128.7, 128.5, 127.9, 127.7, 126.9, 126.7, 124.7, 123.9, 106.7, 66.1, 21.4, 21.3; **TLC** (30% EtOAc/hexanes) R<sub>f</sub> 0.37; **HRMS** (ESI) calc for [C<sub>30</sub>H<sub>26</sub>O<sub>3</sub>N<sub>2</sub>S+Na]<sup>+</sup>: *m/z* 517.1556, found 517.1554.

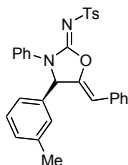

**(Z)-N-((R,Z)-5-benzylidene-3-phenyl-4-(*m*-tolyl)oxazolidin-2-ylidene)-4-methylbenzenesulfonamide ((R)-9dA).** The title compound was prepared according to General Procedure B using (*E*)-*N*-(3-methylbenzylidene)aniline (0.028 g, 0.14 mmol), phenylacetylene (0.017 g, 18  $\mu$ L, 0.17 mmol), *p*-toluenesulfonyl isocyanate (0.033 g, 25  $\mu$ L, 0.17 mmol), (*S,S*)-**L4**AuCl (0.0058 g, 0.007 mmol), and AgNTf<sub>2</sub> (0.0027 g, 0.007 mmol) in chloroform. After 4 h the wet chloroform solution was added. After an additional 36 h, <sup>1</sup>H NMR analysis of the crude mixture gave the diastereomeric ratio: 8:1. The title compound (0.052 g, 0.105 mmol, 75% yield, 68% ee) was isolated as a white solid after flash chromatography, eluting with a gradient from 25 to 30% ethyl acetate/hexanes. Analytical data for the title compound: **HPLC** (Chiral Technology Chiral Pak IA, hexane/IPA= 65:35, flow rate=1 ml/min) T<sub>R</sub> (major) 10.8 min, T<sub>R</sub> (minor) 16.4 min.

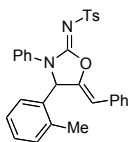

**(Z)-N-((Z)-5-benzylidene-3-phenyl-4-(*o*-tolyl)oxazolidin-2-ylidene)-4-methylbenzenesulfonamide (9eA).** The title compound was prepared according to General Procedure A using (*E*)-*N*-(2-methylbenzylidene)aniline (0.055 g, 0.28 mmol), phenylacetylene (0.035 g, 36  $\mu$ L, 0.34 mmol), *p*-toluenesulfonyl isocyanate (0.067 g, 52  $\mu$ L, 0.34 mmol), and Ph<sub>3</sub>PAuNTf<sub>2</sub> (0.0104 g, 0.014 mmol) in chloroform. After 20 h at 35 °C, <sup>1</sup>H NMR analysis of the crude mixture gave the diastereomeric ratio: 17:1. The title compound (0.109 g, 0.22 mmol, 79% yield) was isolated as a white solid after flash chromatography, eluting with 0.5% methanol/methylene chloride. Analytical data for the title compound: **IR** (thin film, cm<sup>-1</sup>) 1611, 1585, 1161, 1081, 692, 659; **<sup>1</sup>H NMR** (400 MHz, CDCl<sub>3</sub>, 298 K)  $\delta$  7.87 (d, *J* = 8.2 Hz, 2H), 7.56 (d, *J* = 7.6 Hz, 2H), 7.46 (d, *J* = 7.9 Hz, 2H), 7.42–7.24 (m, 8H), 7.24–7.12 (m, 4H), 6.74 (br s, 1H), 5.56 (d, *J* = 1.8 Hz, 1H), 2.33 (s, 3H), 2.18 (br s, 3H); **<sup>1</sup>H NMR** (500 MHz, *d*<sub>6</sub>-DMSO, 353 K)  $\delta$  7.84 (d, *J* = 7.0 Hz, 2H), 7.57 (d, *J* = 7.5 Hz, 2H), 7.42–7.12 (m, 14H), 6.66 (s, 1H), 5.55 (s, 1H), 2.36 (s, 3H), 2.24 (br s, 3H); **<sup>13</sup>C NMR** (125 MHz, *d*<sub>6</sub>-DMSO, 353 K)  $\delta$  152.7, 147.1, 141.9, 139.8, 135.9, 134.1, 133.7, 132.0, 131.1, 128.8, 128.7, 128.5, 128.0, 127.9, 127.0, 126.9, 126.2, 125.6, 124.3, 111.7, 104.3, 63.8, 20.3, 17.7; **TLC** (30% EtOAc/hexanes) R<sub>f</sub> 0.35; **HRMS** (ESI) calc for [C<sub>30</sub>H<sub>26</sub>O<sub>3</sub>N<sub>2</sub>S+H]<sup>+</sup>: *m/z* 495.1730, found 495.1733.

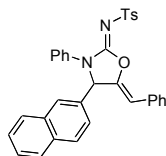

**(Z)-N-((Z)-5-benzylidene-3-phenyl-4-(naphthalene-2-yl)oxazolidin-2-ylidene)-4-methylbenzenesulfonamide (9fA).** The title compound was prepared according to General Procedure A using (*E*)-*N*-(naphthalen-2-ylmethylene)aniline (0.065 g, 0.28 mmol), phenylacetylene (0.035 g, 36  $\mu$ L, 0.34 mmol), *p*-toluenesulfonyl isocyanate (0.067 g, 52  $\mu$ L, 0.34 mmol), and  $\text{Ph}_3\text{PAuNTf}_2$  (0.0104 g, 0.014 mmol) in chloroform. After 20 h at 35  $^\circ\text{C}$ ,  $^1\text{H}$  NMR analysis of the crude mixture gave the diastereomeric ratio: 19:1. The title compound (0.116 g, 0.22 mmol, 78% yield) was isolated as a white solid after flash chromatography, eluting with a gradient from 25 to 30% ethyl acetate/hexanes. Analytical data for the title compound: **IR** (thin film,  $\text{cm}^{-1}$ ) 1625, 1586, 1414, 1158, 853, 779, 708, 661;  **$^1\text{H}$  NMR** (400 MHz,  $\text{CDCl}_3$ , 298 K)  $\delta$  7.99 (d,  $J = 7.6$  Hz, 2H), 7.85–7.75 (m, 4H), 7.63 (d,  $J = 7.6$  Hz, 2H), 7.55–7.48 (m, 2H), 7.42–7.18 (m, 10H), 7.15–7.10 (m, 1H), 6.10 (d,  $J = 1.6$  Hz, 1H), 5.47 (d,  $J = 2.6$  Hz, 1H), 2.39 (s, 3H);  **$^{13}\text{C}$  NMR** (100 MHz,  $\text{CDCl}_3$ , 298 K)  $\delta$  153.3, 146.9, 142.7, 139.7, 134.5, 133.5, 132.9, 132.1, 129.8, 129.2, 129.1, 128.8, 128.6, 128.0, 128.0, 127.8, 127.1, 126.9, 126.8, 124.1, 123.7, 107.2, 66.6, 21.4 (3 signals missing); **TLC** (30% EtOAc/hexanes)  $R_f$  0.32; **HRMS** (ESI) calc for  $[\text{C}_{33}\text{H}_{26}\text{O}_3\text{N}_2\text{S}+\text{Na}]^+$ :  $m/z$  553.1556, found 553.1553.

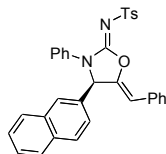

**(Z)-N-((R,Z)-5-benzylidene-3-phenyl-4-(naphthalene-2-yl)oxazolidin-2-ylidene)-4-methylbenzenesulfonamide ((R)-9fA).** The title compound was prepared according to General Procedure B using (*E*)-*N*-(naphthalen-2-ylmethylene)aniline (0.033 g, 0.14 mmol), phenylacetylene (0.017 g, 18  $\mu$ L, 0.17 mmol), *p*-toluenesulfonyl isocyanate (0.033 g, 25  $\mu$ L, 0.17 mmol), (*S,S*)-**L4**AuCl (0.0058 g, 0.007 mmol), and  $\text{AgNTf}_2$  (0.0027 g, 0.007 mmol) in chloroform. After 4 h the wet chloroform solution was added. After an additional 36 h,  $^1\text{H}$  NMR analysis of the crude mixture gave the diastereomeric ratio: 9:1. The title compound (0.050 g, 0.095 mmol, 68% yield, 62% ee) was isolated as a white solid after flash chromatography, eluting with a gradient from 25 to 30% ethyl acetate/hexanes. Analytical data for the title compound: **HPLC** (Chiral Technology Chiral Pak IA, hexane/IPA= 65:35, flow rate=1 ml/min)  $T_R$  (major) 12.0 min,  $T_R$  (minor) 17.0 min.

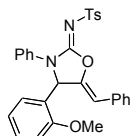



**(Z)-N-((Z)-5-benzylidene-4-(2-methoxyphenyl)-3-phenyloxazolidin-2-ylidene)-4-**

**methylbenzenesulfonamide (9gA).** The title compound was prepared according to General Procedure A using (*E*)-*N*-benzylideneaniline (0.051 g, 0.28 mmol), phenylacetylene (0.035 g, 36  $\mu$ L, 0.34 mmol), *p*-toluenesulfonyl isocyanate (0.067 g, 52  $\mu$ L, 0.34 mmol), and Ph<sub>3</sub>PAuNTf<sub>2</sub> (0.0104 g, 0.014 mmol) in chloroform. After 20 h at 35 °C, <sup>1</sup>H NMR analysis of the crude mixture gave the diastereomeric ratio: 13:1. The title compound (0.130 g of a 15:1 mixture of regioisomers, 0.122 g, 0.24 mmol, 85% yield) was isolated as a mixture of regioisomers as a white solid after flash chromatography, eluting with a gradient from 25 to 30% ethyl acetate/hexanes. Analytical data for the title compound: **IR** (thin film, cm<sup>-1</sup>) 1615, 1583, 1167, 1143, 1085, 893, 760, 681, 664; **<sup>1</sup>H NMR** (400 MHz, CDCl<sub>3</sub>, 298 K)  $\delta$  7.99 (d, *J* = 8.3 Hz, 2H), 7.62 (d, *J* = 7.4 Hz, 2H), 7.40 (t, *J* = 7.5 Hz, 2H), 7.35–7.16 (m, 8H), 7.16–7.08 (m, 2H), 6.90–6.80 (m, 2H), 6.07 (br s, 1H), 5.47 (s, 1H), 3.68 (br s, 3H), 2.36 (s, 3H); **<sup>1</sup>H NMR** (500 MHz, *d*<sub>6</sub>-DMSO, 353 K)  $\delta$  7.67 (d, *J* = 8.0 Hz, 2H), 7.57 (d, *J* = 7.5 Hz, 2H), 7.42–7.22 (m, 12H), 7.20 (t, *J* = 7.5 Hz, 1H), 6.97 (d, *J* = 8.0 Hz, 1H), 6.88 (t, *J* = 7.5 Hz, 1H), 6.46 (d, *J* = 2.0 Hz, 1H), 5.56 (d, *J* = 2.0 Hz, 1H), 3.62 (s, 3H), 2.37 (s, 3H); **<sup>13</sup>C NMR** (125 MHz, *d*<sub>6</sub>-DMSO, 353 K)  $\delta$  157.3, 153.0, 147.5, 141.8, 140.1, 134.3, 132.3, 130.5, 130.2, 128.7, 128.3, 127.9, 127.8, 126.7, 126.5, 125.7, 124.3, 124.1, 120.2, 112.0, 102.9, 63.6, 55.3, 20.3; **TLC** (30% EtOAc/hexanes) *R*<sub>f</sub> 0.21; **HRMS** (ESI) calc for [C<sub>30</sub>H<sub>26</sub>O<sub>4</sub>N<sub>2</sub>S+H]<sup>+</sup>: *m/z* 511.1686, found 511.1680.

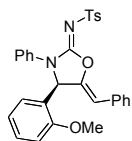

**(Z)-N-((R,Z)-5-benzylidene-4-(2-methoxyphenyl)-3-phenyloxazolidin-2-ylidene)-4-**

**methylbenzenesulfonamide ((R)-9gA).** The title compound was prepared according to General Procedure B using (*E*)-*N*-(2-methoxybenzylidene)aniline (0.030 g, 0.14 mmol), phenylacetylene (0.017 g, 18  $\mu$ L, 0.17 mmol), *p*-toluenesulfonyl isocyanate (0.033 g, 25  $\mu$ L, 0.17 mmol), (*S,S*)-**L4**AuCl (0.0058 g, 0.007 mmol), and AgNTf<sub>2</sub> (0.0027 g, 0.007 mmol) in chloroform. After 6 days, <sup>1</sup>H NMR analysis of the crude mixture gave the diastereomeric ratio: 7:1. The title compound (0.043 g, 0.084 mmol, 60% yield, 82% ee) was isolated as a white solid after flash chromatography, eluting with a gradient from 25 to 30% ethyl acetate/hexanes. Analytical data for the title compound: **HPLC** (Chiral Technology Chiral Pak IA, hexane/IPA= 65:35, flow rate=1 ml/min) *T*<sub>R</sub> (major) 13.2 min, *T*<sub>R</sub> (minor) 18.8 min.

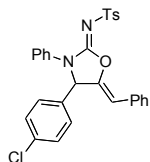

**(Z)-N-((Z)-5-benzylidene-3-phenyl-4-(4-chlorophenyl)oxazolidin-2-ylidene)-4-methylbenzenesulfonamide**

**(9hA).** The title compound was prepared according to General Procedure A using (*E*)-*N*-(4-chlorobenzylidene)aniline (0.060 g, 0.28 mmol), phenylacetylene (0.035 g, 36  $\mu$ L, 0.34 mmol), *p*-toluenesulfonyl isocyanate (0.067 g, 52  $\mu$ L, 0.34 mmol), and Ph<sub>3</sub>PAuNTf<sub>2</sub> (0.0104 g, 0.014 mmol) in chloroform. After 20 h at 35 °C, <sup>1</sup>H NMR analysis of the crude mixture gave the diastereomeric ratio: 14:1. The title compound (0.117 g, 0.23 mmol, 81% yield) was isolated as a white solid after flash chromatography, eluting with a gradient from 25 to 30% ethyl acetate/hexanes. Analytical data for the title compound: **IR** (thin film, cm<sup>-1</sup>) 1622, 1584, 1086, 890, 703, 690; **<sup>1</sup>H NMR** (400 MHz, CDCl<sub>3</sub>, 298 K)  $\delta$  7.93 (d, *J* = 8.3 Hz, 2H), 7.62 (d, *J* = 8.4 Hz, 2H), 7.39 (t, *J* = 7.4 Hz, 2H), 7.35–7.19 (m, 11H), 7.18–7.14 (m, 1H), 5.93 (d, *J* = 2.0 Hz, 1H), 5.43 (d, *J* = 2.0 Hz, 1H), 2.36 (s, 3H); **<sup>13</sup>C NMR** (100 MHz, CDCl<sub>3</sub>, 298 K)  $\delta$  153.0, 146.4, 142.8, 139.5, 135.4, 134.7, 134.2, 131.9, 129.5, 129.2, 129.1, 129.0, 128.7, 128.6, 127.9, 127.1, 126.7, 124.0, 107.1, 65.3, 21.4; **TLC** (30% EtOAc/hexanes) R<sub>f</sub> 0.35; **HRMS** (ESI) calc for [C<sub>29</sub>H<sub>23</sub>O<sub>3</sub>N<sub>2</sub>ClS+Na]<sup>+</sup>: *m/z* 537.1010, found 537.1009.

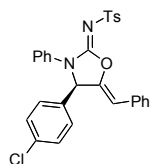

**(Z)-N-((R,Z)-5-benzylidene-3-phenyl-4-(4-chlorophenyl)oxazolidin-2-ylidene)-4-**

**methylbenzenesulfonamide ((R)-9hA).** The title compound was prepared according to General Procedure B using (*E*)-*N*-(4-chlorobenzylidene)aniline (0.030 g, 0.14 mmol), phenylacetylene (0.017 g, 18  $\mu$ L, 0.17 mmol), *p*-toluenesulfonyl isocyanate (0.033 g, 25  $\mu$ L, 0.17 mmol), (*S,S*)-L4AuCl (0.0058 g, 0.007 mmol), and AgNTf<sub>2</sub> (0.0027 g, 0.007 mmol) in chloroform. After 4 h the wet chloroform solution was added. After an additional 36 h, <sup>1</sup>H NMR analysis of the crude mixture gave the diastereomeric ratio: 6:1. The title compound (0.045 g, 0.087 mmol, 63% yield, 79% ee) was isolated as a white solid after flash chromatography, eluting with a gradient from 25 to 30% ethyl acetate/hexanes. Analytical data for the title compound: **HPLC** (Chiral Technology Chiral Pak IA, hexane/IPA= 65:35, flow rate=1 ml/min) T<sub>R</sub> (major) 12.0 min, T<sub>R</sub> (minor) 17.0 min.

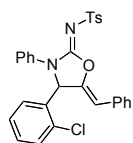

**(Z)-N-((Z)-5-benzylidene-4-(2-chlorophenyl)-3-phenyloxazolidin-2-ylidene)-4-**

**methylbenzenesulfonamide (9iA).** The title compound was prepared according to General Procedure A using (*E*)-*N*-(2-chlorobenzylidene)aniline (0.123 g, 0.50 mmol), phenylacetylene (0.062 g, 66  $\mu$ L, 0.60 mmol), *p*-toluenesulfonyl isocyanate (0.118 g, 91  $\mu$ L, 0.60 mmol), and Ph<sub>3</sub>PAuNTf<sub>2</sub> (0.018 g, 0.025 mmol) in

chloroform (2.5 mL total volume). After 72 hours at room temperature,  $^1\text{H}$  NMR analysis of the crude mixture gave the diastereomeric ratio: 17:1. The title compound (0.175 g, 0.34 mmol, 68% yield) was isolated as a white solid after flash chromatography, eluting with a gradient from 25 to 30% ethyl acetate/hexanes. Analytical data for the title compound: **IR** (thin film,  $\text{cm}^{-1}$ ) 1615, 1585, 1318, 1167, 1147, 892, 756, 703, 686;  **$^1\text{H}$  NMR** (400 MHz,  $\text{CDCl}_3$ , 298 K)  $\delta$  7.93 (d,  $J = 8.3$  Hz, 2H), 7.62 (d,  $J = 7.7$  Hz, 1H), 7.41 (t,  $J = 7.6$  Hz, 2H), 7.42–7.32 (m, 3H), 7.32–7.22 (m, 6H), 7.21 (d,  $J = 8.3$  Hz, 2H), 7.18–7.13 (m, 1H), 6.66 (br s, 1H), 5.58 (br s, 1H), 2.37 (s, 3H);  **$^1\text{H}$  NMR** (500 MHz,  $d_6$ -DMSO, 353 K)  $\delta$  7.85 (d,  $J = 7.5$  Hz, 2H), 7.58 (d,  $J = 7.58$  Hz, 2H), 7.52 (d,  $J = 7.0$  Hz, 1H), 7.45 (d,  $J = 7.5$  Hz, 2H), 7.42–7.35 (m, 10H), 7.23 (t,  $J = 7.3$  Hz, 1H), 6.75 (s, 1H), 5.60 (s, 1H), 2.36 (s, 3H);  **$^{13}\text{C}$  NMR** (125 MHz,  $d_6$ -DMSO, 353 K)  $\delta$  152.8, 145.9, 141.9, 139.9, 133.9, 132.6, 132.2, 132.0, 130.7, 130.3, 128.7, 128.5, 128.1, 127.9, 127.3, 127.0, 126.9, 125.7, 124.3, 104.3, 64.0, 20.3 (1 missing signal); **TLC** (30% EtOAc/hexanes)  $R_f$  0.25; **HRMS** (ESI) calc for  $[\text{C}_{29}\text{H}_{23}\text{O}_3\text{N}_2\text{ClS}+\text{H}]^+$ :  $m/z$  515.1191, found 515.1187.

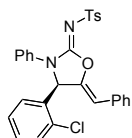

**(Z)-N-((R,Z)-5-benzylidene-4-(2-chlorophenyl)-3-phenyloxazolidin-2-ylidene)-4-**

**methylbenzenesulfonamide ((R)-9iA).** The title compound was prepared according to General Procedure B using (*E*)-*N*-(2-chlorobenzylidene)aniline (0.030 g, 0.14 mmol), phenylacetylene (0.017 g, 18  $\mu\text{L}$ , 0.17 mmol), *p*-toluenesulfonyl isocyanate (0.033 g, 25  $\mu\text{L}$ , 0.17 mmol), (*S,S*)-**L4**AuCl (0.0058 g, 0.007 mmol), and AgNTf<sub>2</sub> (0.0027 g, 0.007 mmol) in chloroform. After 4 h the wet chloroform solution was added. After an additional 36 h,  $^1\text{H}$  NMR analysis of the crude mixture gave the diastereomeric ratio: 7:1. The title compound (0.044 g, 0.086 mmol, 61% yield, 91% ee) was isolated as a white solid after flash chromatography, eluting with a gradient from 25 to 30% ethyl acetate/hexanes. Analytical data for the title compound: **HPLC** (Chiral Technology Chiral Pak IA, hexane/IPA= 65:35, flow rate=1 ml/min)  $T_R$  (major) 12.3 min,  $T_R$  (minor) 18.2 min.

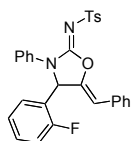

**(Z)-N-((Z)-5-benzylidene-4-(2-fluorophenyl)-3-phenyloxazolidin-2-ylidene)-4-methylbenzenesulfonamide**

**(9jA).** The title compound was prepared according to General Procedure A using (*E*)-*N*-(2-fluorobenzylidene)aniline (0.056 g, 0.28 mmol), phenylacetylene (0.035 g, 36  $\mu\text{L}$ , 0.34 mmol), *p*-toluenesulfonyl isocyanate (0.067 g, 52  $\mu\text{L}$ , 0.34 mmol), and Ph<sub>3</sub>PAuNTf<sub>2</sub> (0.0104 g, 0.014 mmol) in

chloroform. After 20 h at 35 °C,  $^1\text{H}$  NMR analysis of the crude mixture gave the diastereomeric ratio: 14:1. The title compound (0.117 g of a 20:1 mixture of regioisomers, 0.111 g, 0.22 mmol, 80% yield) was isolated as a mixture of regioisomers as a white solid after flash chromatography, eluting with a gradient from 25 to 30% ethyl acetate/hexanes. Analytical data for the title compound: **IR** (thin film,  $\text{cm}^{-1}$ ) 2981, 1615, 1584, 1168, 1144, 1086, 761, 664;  **$^1\text{H}$  NMR** (400 MHz,  $\text{CDCl}_3$ , 298 K)  $\delta$  7.95 (d,  $J = 8.3$  Hz, 2H), 7.61 (d,  $J = 7.3$  Hz, 2H), 7.40 (t,  $J = 7.7$  Hz, 2H), 7.35 (d,  $J = 7.6$  Hz, 2H), 7.34–7.24 (m, 5H), 7.22 (d,  $J = 7.1$  Hz, 2H), 7.16 (t,  $J = 7.4$  Hz, 1H), 7.10 (td,  $J = 7.6, 0.9$  Hz, 1H), 7.05 (dd,  $J = 10.2, 8.4$  Hz, 1H), 6.26 (d,  $J = 1.8$  Hz, 1H), 5.53 (d,  $J = 1.8$  Hz, 1H), 2.37 (s, 3H);  **$^{13}\text{C}$  NMR** (100 MHz,  $\text{CDCl}_3$ , 298 K)  $\delta$  160.6 (d,  $J = 249.4$  Hz), 153.1, 145.7, 142.7, 139.6, 134.3, 132.0, 131.4 (d,  $J = 8.6$  Hz), 129.2, 128.8, 128.6, 127.8, 127.1, 126.7, 125.0 (d,  $J = 3.6$  Hz), 123.7, 123.6 (d,  $J = 11.8$  Hz), 116.3 (d,  $J = 20.8$  Hz), 106.5, 60.4 (d,  $J = 1.8$  Hz), 21.4 (2 carbon signals missing);  **$^1\text{H}$  NMR** (500 MHz,  $d_6$ -DMSO, 353 K)  $\delta$  7.85 (d,  $J = 7.5$  Hz, 2H), 7.59 (d,  $J = 8.0$  Hz, 2H), 7.49–7.12 (m, 14H), 6.66 (s, 1H), 5.67 (s, 1H), 2.36 (s, 3H);  **$^{13}\text{C}$  NMR** (125 MHz,  $d_6$ -DMSO, 353 K)  $\delta$  160.1 (d,  $J = 248.6$  Hz), 152.6, 146.4, 141.9, 139.8, 134.0, 131.9, 131.3 (d,  $J = 8.6$  Hz), 130.5 (d,  $J = 3.1$  Hz), 128.8, 128.6, 128.0, 128.0, 127.1, 126.9, 125.5, 124.5 (d,  $J = 3.5$  Hz), 124.3, 123.3 (d,  $J = 11.1$  Hz), 115.7 (d,  $J = 20.6$  Hz), 104.4, 61.3 (d,  $J = 2.2$  Hz), 20.3; **TLC** (30% EtOAc/hexanes)  $R_f$  0.25; **HRMS** (ESI) calc for  $[\text{C}_{29}\text{H}_{23}\text{O}_3\text{N}_2\text{FS}+\text{H}]^+$ :  $m/z$  499.1486, found 499.1485.

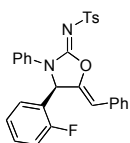

**(Z)-N-((R,Z)-5-benzylidene-4-(2-fluorophenyl)-3-phenyloxazolidin-2-ylidene)-4-**

**methylbenzenesulfonamide ((R)-9jA).** The title compound was prepared according to General Procedure B using (*E*)-*N*-(2-fluorobenzylidene)aniline (0.028 g, 0.14 mmol), phenylacetylene (0.017 g, 18  $\mu\text{L}$ , 0.17 mmol), *p*-toluenesulfonyl isocyanate (0.033 g, 25  $\mu\text{L}$ , 0.17 mmol), (*S,S*)-**L4**AuCl (0.0058 g, 0.007 mmol), and AgNTf<sub>2</sub> (0.0027 g, 0.007 mmol) in chloroform. After 4 h the wet chloroform solution was added. After an additional 36 h,  $^1\text{H}$  NMR analysis of the crude mixture gave the diastereomeric ratio: 8:1. The title compound (0.038 g, 0.077 mmol, 55% yield, 86% ee) was isolated as a white solid after flash chromatography, eluting with a gradient from 25 to 30% ethyl acetate/hexanes. Analytical data for the title compound: **HPLC** (Chiral Technology Chiral Pak IA, hexane/IPA= 65:35, flow rate=1 ml/min)  $T_R$  (major) 12.7 min,  $T_R$  (minor) 18.7 min.

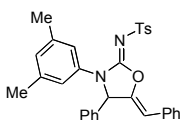

**(Z)-N-((Z)-5-benzylidene-3-(3,5-dimethylphenyl)-4-phenyloxazolidin-2-ylidene)-4-**

**methylbenzenesulfonamide (9kA).** The title compound was prepared according to General Procedure A using (*E*)-*N*-benzylidene-3,5-dimethylaniline (0.059 g, 0.28 mmol), phenylacetylene (0.035 g, 36  $\mu$ L, 0.34 mmol), *p*-toluenesulfonyl isocyanate (0.067 g, 52  $\mu$ L, 0.34 mmol), and Ph<sub>3</sub>PAuNTf<sub>2</sub> (0.0104 g, 0.014 mmol) in chloroform. After 20 h at 35 °C, <sup>1</sup>H NMR analysis of the crude mixture gave the diastereomeric ratio: 19:1. The title compound (0.114 g, 0.22 mmol, 80% yield) was isolated as a white solid after flash chromatography, eluting with a gradient from 20 to 25% ethyl acetate/hexanes. Analytical data for the title compound: **IR** (thin film, cm<sup>-1</sup>) 1625, 1590, 1284, 1091, 867, 777; **<sup>1</sup>H NMR** (400 MHz, *d*<sub>6</sub>-DMSO, 298 K)  $\delta$  7.86 (d, *J* = 8.1 Hz, 2H), 7.53 (d, *J* = 7.6 Hz, 2H), 7.45–7.25 (m, 10H), 7.11 (s, 2H), 6.86 (s, 1H), 6.23 (d, *J* = 1.0 Hz, 1H), 5.58 (d, *J* = 1.0 Hz, 1H), 2.33 (s, 3H), 2.19 (s, 6H); **<sup>13</sup>C NMR** (100 MHz, *d*<sub>6</sub>-DMSO, 298 K)  $\delta$  153.2, 148.3, 142.5, 139.9, 138.2, 136.8, 134.2, 132.3, 129.4, 129.2, 129.1, 128.9, 128.6, 128.4, 127.7, 127.6, 126.1, 122.5, 105.0, 65.2, 20.9, 20.8; **TLC** (30% EtOAc/hexanes) *R*<sub>f</sub> 0.43; **HRMS** (ESI) calc for [C<sub>31</sub>H<sub>28</sub>O<sub>3</sub>N<sub>2</sub>S+Na]<sup>+</sup>: *m/z* 531.1713, found 531.1711.

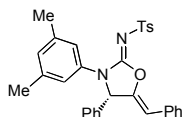

**(*Z*)-*N*-((*S,Z*)-5-benzylidene-3-(3,5-dimethylphenyl)-4-phenyloxazolidin-2-ylidene)-4-**

**methylbenzenesulfonamide ((*S*)-9kA).** The title compound was prepared according to General Procedure D using (*E*)-*N*-benzylidene-3,5-dimethylaniline (0.013 g, 0.061 mmol), phenylacetylene (0.0075 g, 0.073 mmol), *p*-toluenesulfonyl isocyanate (0.0144 g, 0.073 mmol), (*R,R*)-L4AuCl (0.0050 g, 0.006 mmol), and AgNTf<sub>2</sub> (0.0024 g, 0.006 mmol) in methylene chloride. After 96 h, <sup>1</sup>H NMR analysis of the crude mixture gave the diastereomeric ratio of 3:1 and showed 15% uncyclized urea was still present. The title compound (0.012 g, 0.023 mmol, 38% yield, 91% ee) was isolated as a white solid after flash chromatography, eluting with a gradient from 20 to 25% ethyl acetate/hexanes. Analytical data for the title compound: **HPLC** (Chiral Technology Chiral Pak IA, hexane/IPA= 65:35, flow rate=1 ml/min) *T*<sub>R</sub> (major) 10.2 min, *T*<sub>R</sub> (minor) 17.9 min.

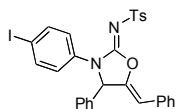

**(*Z*)-*N*-((*Z*)-5-benzylidene-3-(4-iodophenyl)-4-phenyloxazolidin-2-ylidene)-4-**

**methylbenzenesulfonamide (9IA).** The title compound was prepared according to General Procedure A using (*E*)-*N*-benzylidene-4-iodoaniline (0.086 g, 0.28 mmol), phenylacetylene (0.035 g, 36  $\mu$ L, 0.34 mmol), *p*-toluenesulfonyl isocyanate (0.067 g, 52  $\mu$ L, 0.34 mmol), and Ph<sub>3</sub>PAuNTf<sub>2</sub> (0.0104 g, 0.014 mmol) in chloroform. After 48 h at 35 °C, <sup>1</sup>H NMR analysis of the crude mixture gave the diastereomeric ratio: 16:1. The title compound (0.129 g, 0.21

mmol, 76% yield) was isolated as a white solid after flash chromatography, eluting with a gradient from 20 to 25% ethyl acetate/hexanes. Analytical data for the title compound: **IR** (thin film,  $\text{cm}^{-1}$ ) 1610, 1567, 1418, 288, 763, 693;  **$^1\text{H NMR}$**  (400 MHz,  $d_6$ -DMSO, 298 K)  $\delta$  7.86 (d,  $J = 8.3$  Hz, 2H), 7.72 (d,  $J = 8.8$  Hz, 2H), 7.54 (d,  $J = 7.5$  Hz, 2H), 7.42–7.25 (m, 12H), 6.55 (d,  $J = 2.0$  Hz, 1H), 5.60 (d,  $J = 2.0$  Hz, 1H), 2.34 (s, 3H);  **$^{13}\text{C NMR}$**  (100 MHz,  $d_6$ -DMSO, 298 K)  $\delta$  152.9, 148.0, 142.7, 139.7, 137.8, 136.5, 134.2, 132.3, 129.5, 129.3, 129.2, 128.6, 128.4, 127.7, 127.6, 126.8, 126.1, 105.2, 92.9, 64.9, 21.0; **TLC** (30% EtOAc/hexanes)  $R_f$  0.47; **HRMS** (ESI) calc for  $[\text{C}_{29}\text{H}_{23}\text{O}_3\text{N}_2\text{IS}+\text{Na}]^+$ :  $m/z$  629.0358, found 629.0362.

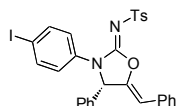

**(Z)-N-((S,Z)-5-benzylidene-3-(4-iodophenyl)-4-phenyloxazolidin-2-ylidene)-4-methylbenzenesulfonamide ((S)-9IA)**. The title compound was prepared according to General Procedure D using (*E*)-*N*-benzylidene-4-iodoaniline (0.019 g, 0.061 mmol), phenylacetylene (0.0075 g, 0.073 mmol), *p*-toluenesulfonyl isocyanate (0.0144 g, 0.073 mmol), (*R,R*)-**L4**AuCl (0.0050 g, 0.006 mmol), and AgNTf<sub>2</sub> (0.0024 g, 0.006 mmol) in methylene chloride. After 96 h,  $^1\text{H NMR}$  analysis of the crude mixture gave the diastereomeric ratio of 3:1 and showed 22% uncyclized urea was still present. The title compound (0.016 g, 0.026 mmol, 43% yield, 84% ee) was isolated as a white solid after flash chromatography, eluting with a gradient from 20 to 25% ethyl acetate/hexanes. Analytical data for the title compound: **HPLC** (Chiral Technology Chiral Pak IA, hexane/IPA= 65:35, flow rate=1 ml/min)  $T_R$  (major) 19.0 min,  $T_R$  (minor) 15.9 min.

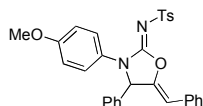

**(Z)-N-((Z)-5-benzylidene-3-(4-methoxyphenyl)-4-phenyloxazolidin-2-ylidene)-4-methylbenzenesulfonamide (9mA)**. The title compound was prepared according to General Procedure A using (*E*)-*N*-benzylidene-4-methoxyaniline (0.059 g, 0.28 mmol), phenylacetylene (0.035 g, 36  $\mu\text{L}$ , 0.34 mmol), *p*-toluenesulfonyl isocyanate (0.067 g, 52  $\mu\text{L}$ , 0.34 mmol), and Ph<sub>3</sub>PAuNTf<sub>2</sub> (0.0104 g, 0.014 mmol) in chloroform. After 20 h at 35 °C,  $^1\text{H NMR}$  analysis of the crude mixture gave the diastereomeric ratio: 18:1. The title compound (0.104 g, 0.20 mmol, 73% yield) was isolated as a white solid after flash chromatography, eluting with a gradient from 25 to 30 to 35% ethyl acetate/hexanes. Analytical data for the title compound: **IR** (thin film,  $\text{cm}^{-1}$ ) 1608, 1585, 1512, 1301, 1115, 1084, 668;  **$^1\text{H NMR}$**  (400 MHz,  $d_6$ -DMSO, 298 K)  $\delta$  7.85 (d,  $J = 8.3$  Hz, 2H), 7.53 (d,  $J = 7.4$  Hz, 2H), 7.45–7.25 (m, 12H), 6.90 (d,  $J = 9.0$  Hz, 1H), 6.44 (d,  $J = 2.0$  Hz, 1H), 5.58 (d,  $J = 2.0$  Hz, 1H), 3.70 (s, 3H), 2.33 (s, 3H);  **$^{13}\text{C NMR}$**  (100 MHz,  $d_6$ -DMSO, 298 K)  $\delta$  158.2, 153.5, 148.3, 142.5, 139.9, 136.7, 132.3, 129.4, 129.2, 129.2, 128.5, 128.3, 127.8, 127.6, 126.9, 126.8, 126.1,

114.3, 105.1, 65.8, 55.3, 20.9; **TLC** (30% EtOAc/hexanes)  $R_f$  0.25; **HRMS** (ESI) calc for  $[C_{30}H_{26}O_4N_2S+Na]^+$ :  $m/z$  533.1506, found 533.1504.

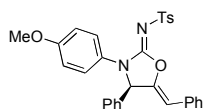

**(Z)-N-((R,Z)-5-benzylidene-3-(4-methoxyphenyl)-4-phenyloxazolidin-2-ylidene)-4-**

**methylbenzenesulfonamide ((R)-9mA).** The title compound was prepared according to General Procedure B using (*E*)-*N*-benzylidene-4-methoxyaniline (0.030 g, 0.14 mmol), phenylacetylene (0.017 g, 18  $\mu$ L, 0.17 mmol), *p*-toluenesulfonyl isocyanate (0.033 g, 25  $\mu$ L, 0.17 mmol), (*S,S*)-**L4**AuCl (0.0058 g, 0.007 mmol), and AgNTf<sub>2</sub> (0.0027 g, 0.007 mmol) in chloroform. After 4 h the wet chloroform solution was added. After an additional 36 h, <sup>1</sup>H NMR analysis of the crude mixture gave the diastereomeric ratio: 8:1. The title compound (0.049 g, 0.097 mmol, 69% yield, 72% ee) was isolated as a white solid after flash chromatography, eluting with a gradient from 25 to 30 to 35% ethyl acetate/hexanes. Analytical data for the title compound: **HPLC** (Chiral Technology Chiral Pak IA, hexane/IPA= 65:35, flow rate=1 ml/min)  $T_R$  (major) 15.4 min,  $T_R$  (minor) 13.9 min.

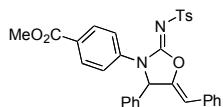

**Methyl 4-((2Z,5Z)-5-benzylidene-4-phenyl-2-(tosylimino)oxazolidin-3-yl)benzoate (9nA).** The title compound was prepared according to General Procedure A using (*E*)-methyl 4-(benzylideneamino)benzoate (0.067 g, 0.28 mmol), phenylacetylene (0.035 g, 36  $\mu$ L, 0.34 mmol), *p*-toluenesulfonyl isocyanate (0.067 g, 52  $\mu$ L, 0.34 mmol), and Ph<sub>3</sub>PAuNTf<sub>2</sub> (0.0104 g, 0.014 mmol) in chloroform. After 48 h at 35 °C, <sup>1</sup>H NMR analysis of the crude mixture gave the diastereomeric ratio: 18:1. Diethyl ether (3 mL) was layered onto the reaction mixture and left to stand overnight. The crude product was filtered and recrystallized from ethanol (12 mL) to afford the title compound (0.113 g, 0.21 mmol, 75% yield) as a white solid. Analytical data for the title compound: **IR** (thin film, cm<sup>-1</sup>) 1713, 1623, 1595, 1427, 1144, 1012, 815, 771; **<sup>1</sup>H NMR** (400 MHz, CDCl<sub>3</sub>, 298 K)  $\delta$  7.96–7.89 (m, 4H), 7.63 (d,  $J$  = 8.2 Hz, 2H), 7.45 (dd,  $J$  = 8.9, 1.2 Hz, 2H), 7.39 (t,  $J$  = 7.8 Hz, 2H), 7.35–7.22 (m, 6H), 7.24 (d,  $J$  = 8.1 Hz, 2H), 6.02 (s, 1H), 5.47 (s, 1H), 3.85 (s, 3H), 2.38 (s, 3H); **<sup>13</sup>C NMR** (100 MHz, CDCl<sub>3</sub>, 298 K)  $\delta$  165.9, 152.5, 146.4, 143.0, 139.3, 138.5, 135.9, 131.9, 130.3, 129.5, 129.4, 129.3, 128.7, 128.5, 127.8, 127.6, 127.2, 126.7, 122.5, 107.1, 65.3, 52.1, 21.4; **TLC** (30% EtOAc/hexanes)  $R_f$  0.27; **HRMS** (ESI) calc for  $[C_{31}H_{26}O_5N_2S+Na]^+$ :  $m/z$  561.1455, found 561.1452.

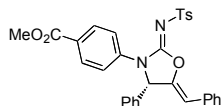

**Methyl 4-((*S*,2*Z*,5*Z*)-5-benzylidene-4-phenyl-2-(tosylimino)oxazolidin-3-yl)benzoate ((*S*)-9nA).** The title compound was prepared according to General Procedure D using (*E*)-methyl 4-(benzylideneamino)benzoate (0.0155 g, 0.061 mmol), phenylacetylene (0.0075 g, 0.073 mmol), *p*-toluenesulfonyl isocyanate (0.0144 g, 0.073 mmol), (*R,R*)-**L4**AuCl (0.0050 g, 0.006 mmol), and AgNTf<sub>2</sub> (0.0024 g, 0.006 mmol) in methylene chloride. After 96 h, <sup>1</sup>H NMR analysis of the crude mixture gave the diastereomeric ratio of 4:1 and showed 20% uncyclized urea was still present. The title compound (0.015 g, 0.027 mmol, 45% yield, 78% ee) was isolated as a white solid after flash chromatography, eluting with a gradient from 30 to 35% ethyl acetate/hexanes. Analytical data for the title compound: **HPLC** (Chiral Technology Chiral Pak IB, hexane/IPA= 65:35, flow rate=1 ml/min) T<sub>R</sub> (major) 14.3 min, T<sub>R</sub> (minor) 11.5 min.

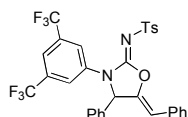

**(*Z*)-*N*-((*Z*)-5-benzylidene-3-(3,5-bis(trifluoromethyl)phenyl)-4-phenyloxazolidin-2-ylidene)-4-methylbenzenesulfonamide (9oA).** The title compound was prepared according to General Procedure A using (*E*)-*N*-benzylidene-3,5-bis(trifluoromethyl)aniline (0.089 g, 0.28 mmol), phenylacetylene (0.035 g, 36 μL, 0.34 mmol), *p*-toluenesulfonyl isocyanate (0.067 g, 52 μL, 0.34 mmol), and Ph<sub>3</sub>PAuNTf<sub>2</sub> (0.0104 g, 0.014 mmol) in chloroform. After 48 h at 35 °C, <sup>1</sup>H NMR analysis of the crude mixture gave the diastereomeric ratio: 5:1. Diethyl ether (3 mL) was layered onto the reaction mixture and left to stand overnight. The crude product was filtered and recrystallized from ethanol (15 mL) to afford the title compound (0.112 g, 0.18 mmol, 65% yield) as a white solid. Analytical data for the title compound: **IR** (thin film, cm<sup>-1</sup>) 1637, 1609, 1307, 907, 883, 801, 716; **<sup>1</sup>H NMR** (400 MHz, CDCl<sub>3</sub>, 298 K) δ 7.94 (d, *J* = 8.3 Hz, 2H), 7.81 (s, 2H), 7.66 (d, *J* = 8.6 Hz, 2H), 7.60 (s, 1H), 7.43–7.32 (m, 7H), 7.29 (d, *J* = 8.4 Hz, 2H), 7.27–7.23 (m, 1H), 6.03 (d, *J* = 2.0 Hz, 1H), 5.52 (d, *J* = 2.0 Hz, 1H), 2.42 (s, 3H); **<sup>13</sup>C NMR** (100 MHz, CDCl<sub>3</sub>, 298 K) δ 152.0, 146.0, 143.3, 139.2, 136.4, 135.3, 132.2 (q, *J* = 33.7 Hz), 131.7, 130.0, 129.8, 129.4, 128.9, 128.7, 128.1, 127.5, 126.6, 122.6 (q, *J* = 278.3 Hz), 122.6 (q, *J* = 3.4 Hz), 119.5 (m), 107.8, 65.3, 21.5; **<sup>19</sup>F NMR** (376 MHz, CDCl<sub>3</sub>, 298 K) δ 62.38 (s, 6F); **TLC** (30% EtOAc/hexanes) R<sub>f</sub> 0.68; **HRMS** (ESI) calc for [C<sub>31</sub>H<sub>22</sub>O<sub>3</sub>N<sub>2</sub>F<sub>6</sub>S+H]<sup>+</sup>: *m/z* 617.1328, found 617.1330.

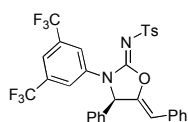

**(*Z*)-*N*-((*R,Z*)-5-benzylidene-3-(3,5-bis(trifluoromethyl)phenyl)-4-phenyloxazolidin-2-ylidene)-4-**



**methylbenzenesulfonamide ((R)-9oA).** The title compound was prepared according to General Procedure B using (*E*)-*N*-benzylidene-3,5-bis(trifluoromethyl)aniline (0.045 g, 0.14 mmol), phenylacetylene (0.017 g, 18  $\mu$ L, 0.17 mmol), *p*-toluenesulfonyl isocyanate (0.033 g, 25  $\mu$ L, 0.17 mmol), (*S,S*)-**L4**AuCl (0.0058 g, 0.007 mmol), and AgNTf<sub>2</sub> (0.0027 g, 0.007 mmol) in chloroform. After 4 h the wet chloroform solution was added. After an additional 36 h, <sup>1</sup>H NMR analysis of the crude mixture gave the diastereomeric ratio: 5:1. The title compound (0.042 g, 0.067 mmol, 48% yield, 95% ee) was isolated as a white solid after flash chromatography, eluting with a gradient from 10 to 15% ethyl acetate/hexanes. Analytical data for the title compound: **HPLC** (Chiral Technology Chiral Pak IA, hexane/IPA= 85:15, flow rate=1 ml/min) T<sub>R</sub> (major) 14.2 min, T<sub>R</sub> (minor) 15.4 min.

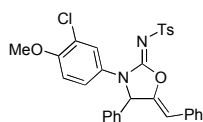

**(Z)-N-((Z)-5-benzylidene-3-(3-chloro-4-methoxyphenyl)-4-phenyloxazolidin-2-ylidene)-4-**

**methylbenzenesulfonamide (9pA).** The title compound was prepared according to General Procedure A using (*E*)-*N*-benzylidene-3-chloro-4-methoxyaniline (0.123 g, 0.50 mmol), phenylacetylene (0.062 g, 66  $\mu$ L, 0.60 mmol), *p*-toluenesulfonyl isocyanate (0.118 g, 91  $\mu$ L, 0.60 mmol), and Ph<sub>3</sub>PAuNTf<sub>2</sub> (0.018 g, 0.025 mmol) in chloroform (2.5 mL total volume). After 48 h at room temperature, <sup>1</sup>H NMR analysis of the crude mixture gave the diastereomeric ratio: 17:1. The title compound (0.205 g, 0.38 mmol, 75% yield) was isolated as large colorless rods after concentrating to dryness, redissolving in methylene chloride (1.0 mL), and layering with hexanes (4.0 mL). Analytical data for the title compound: **IR** (thin film, cm<sup>-1</sup>) 1614, 1597, 1503, 1085, 909, 696; **<sup>1</sup>H NMR** (400 MHz, *d*<sub>6</sub>-DMSO, 298 K)  $\delta$  7.86 (d, *J* = 8.2 Hz, 2H), 7.65 (d, *J* = 2.5 Hz, 1H), 7.53 (d, *J* = 7.6 Hz, 2H), 7.42–7.30 (m, 9H), 7.28 (t, *J* = 7.3 Hz, 1H), 7.11 (d, *J* = 9.0 Hz, 1H), 6.47 (d, *J* = 1.7 Hz, 1H), 5.75 (s, 1H), 5.59 (d, *J* = 1.7 Hz, 1H), 3.80 (s, 3H), 2.34 (s, 3H); **<sup>13</sup>C NMR** (100 MHz, *d*<sub>6</sub>-DMSO, 298 K)  $\delta$  153.6, 153.4, 148.2, 142.5, 139.8, 136.5, 132.3, 129.4, 129.2, 128.5, 128.3, 127.9, 127.6, 127.3, 126.9, 126.1, 125.7, 120.8, 112.8, 105.1, 65.6, 56.3, 54.9, 20.9; **TLC** (30% EtOAc/hexanes) R<sub>f</sub> 0.16; **HRMS** (ESI) calc for [C<sub>30</sub>H<sub>25</sub>O<sub>4</sub>N<sub>2</sub>ClS+H]<sup>+</sup>: *m/z* 545.1289, found 545.1291.

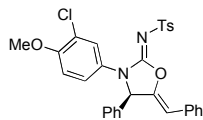

**(Z)-N-((R,Z)-5-benzylidene-3-(3-chloro-4-methoxyphenyl)-4-phenyloxazolidin-2-ylidene)-4-**

**methylbenzenesulfonamide ((R)-9pA).** The title compound was prepared according to General Procedure B using (*E*)-*N*-benzylidene-3-chloro-4-methoxyaniline (0.034 g, 0.14 mmol), phenylacetylene (0.017 g, 18  $\mu$ L, 0.17 mmol), *p*-toluenesulfonyl isocyanate (0.033 g, 25  $\mu$ L, 0.17 mmol), (*S,S*)-**L4**AuCl (0.0058 g, 0.007 mmol), and AgNTf<sub>2</sub> (0.0027 g, 0.007 mmol) in chloroform. After 4 h the wet chloroform solution was added. After an

additional 36 h,  $^1\text{H}$  NMR analysis of the crude mixture gave the diastereomeric ratio: 6:1. The title compound (0.053 g, 0.098 mmol, 70% yield, 77% ee) was isolated as a white solid after flash chromatography, eluting with a gradient from 30 to 40% ethyl acetate/hexanes. X-ray quality crystals were obtained by dissolving 0.050 g in methylene chloride (1.0 mL) and layering on diethyl ether (1.0 mL) and hexanes (3.0 mL). Analytical data for the title compound: **HPLC** (Chiral Technology Chiral Pak IA, hexane/IPA= 65:35, flow rate=1 ml/min)  $T_R$  (major) 15.4 min,  $T_R$  (minor) 12.6 min.

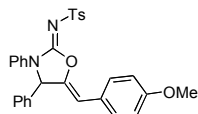

**(Z)-N-((Z)-5-(4-methoxybenzylidene)-3,4-diphenyloxazolidin-2-ylidene)-4-methylbenzenesulfonamide (9qA).** The title compound was prepared according to General Procedure A using (*E*)-*N*-benzylideneaniline (0.051 g, 0.28 mmol), 1-ethynyl-4-methoxybenzene (0.045 g, 0.34 mmol), *p*-toluenesulfonyl isocyanate (0.067 g, 52  $\mu\text{L}$ , 0.34 mmol), and  $\text{Ph}_3\text{PAuNTf}_2$  (0.0104 g, 0.014 mmol) in chloroform. After 48 h at room temperature,  $^1\text{H}$  NMR analysis of the crude mixture gave the diastereomeric ratio: 2.4:1. The title compound (0.062 g, 0.12 mmol, 43% yield) was isolated as a white solid after flash chromatography, eluting with a gradient from 30 to 40% ethyl acetate/hexanes. Analytical data for the title compound: **IR** (thin film,  $\text{cm}^{-1}$ ) 1621, 1585, 1167, 1145, 1129, 757, 684;  **$^1\text{H}$  NMR** (400 MHz,  $\text{CDCl}_3$ , 298 K)  $\delta$  7.96 (d,  $J = 8.3$  Hz, 2H), 7.62 (d,  $J = 8.8$  Hz, 2H), 7.38–7.28 (m, 3H), 7.33–7.24 (m, 8H), 7.20–7.12 (m, 1H), 6.97 (d,  $J = 8.9$  Hz, 2H), 5.93 (d,  $J = 2.0$  Hz, 1H), 5.42 (d,  $J = 2.0$  Hz, 1H), 3.87 (s, 3H), 2.41 (s, 3H);  **$^{13}\text{C}$  NMR** (100 MHz,  $\text{CDCl}_3$ , 298 K)  $\delta$  159.1, 153.4, 145.2, 142.6, 139.7, 136.5, 134.6, 130.2, 129.4, 129.3, 129.2, 129.1, 127.6, 127.0, 126.7, 124.9, 124.1, 114.0, 106.6, 66.2, 55.2, 21.5; **TLC** (30% EtOAc/hexanes)  $R_f$  0.27; **HRMS** (ESI) calc for  $[\text{C}_{30}\text{H}_{26}\text{O}_4\text{N}_2\text{S}+\text{H}]^+$ :  $m/z$  511.1686, found 511.1682.

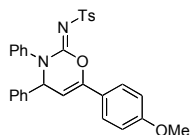

**(Z)-N-(6-(4-methoxyphenyl)-3,4-diphenyl-3,4-dihydro-2H-1,3-oxazin-2-ylidene)-4-methylbenzenesulfonamide (9qB).** The title compound was isolated from the above reaction as a yellow semi-solid after flash chromatography, eluting with a gradient from 30 to 40% ethyl acetate/hexanes. Analytical data for the title compound: **IR** (thin film,  $\text{cm}^{-1}$ ) 2980, 1557, 1179, 1144, 1086, 692, 664;  **$^1\text{H}$  NMR** (400 MHz,  $\text{CDCl}_3$ , 298 K)  $\delta$  7.78 (d,  $J = 9.0$  Hz, 2H), 7.67 (d,  $J = 8.3$  Hz, 2H), 7.32–7.22 (m, 6H), 7.18–7.10 (m, 4H), 7.00–6.94 (m, 4H), 5.75 (d,  $J = 4.8$  Hz, 1H), 5.23 (d,  $J = 4.8$  Hz, 1H), 3.86 (s, 3H), 2.34 (s, 3H);  **$^{13}\text{C}$  NMR** (100 MHz,  $\text{CDCl}_3$ , 298 K)  $\delta$  161.0, 151.6, 147.1, 141.7, 141.0, 139.9, 139.2, 129.2, 129.1, 129.0, 128.9, 128.2, 127.6, 127.5, 126.9, 126.2, 122.8, 114.2, 98.3, 63.1, 55.4, 21.4; **TLC** (30% EtOAc/hexanes)  $R_f$  0.13.

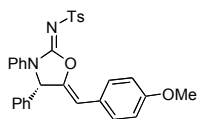

**(Z)-N-((S,Z)-5-(4-methoxybenzylidene)-3,4-diphenyloxazolidin-2-ylidene)-4-methylbenzenesulfonamide ((S)-9qA).** The title compound was prepared according to General Procedure C using (*E*)-*N*-benzylideneaniline (0.011 g, 0.061 mmol), 1-ethynyl-4-methoxybenzene (0.016 g, 0.12 mmol), *p*-toluenesulfonyl isocyanate (0.024 g, 18  $\mu$ L, 0.12 mmol), (*R,R*)-**L4**AuCl (0.0050 g, 0.006 mmol), and AgNTf<sub>2</sub> (0.0024 g, 0.006 mmol) in toluene. After 5 days, <sup>1</sup>H NMR analysis of the crude mixture gave the diastereomeric ratio of 1:1.8 and a yield of 25% of the title compound using nitrobenzene as an internal standard. The title compound (74% ee) was isolated as a white solid after flash chromatography, eluting with a gradient from 25 to 30% ethyl acetate/hexanes. Analytical data for the title compound: **HPLC** (Chiral Technology Chiral Pak IA, hexane/IPA= 65:35, flow rate=1 ml/min) T<sub>R</sub> (major) 13.3 min, T<sub>R</sub> (minor) 26.5 min.

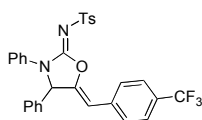

**(Z)-N-((Z)-3,4-diphenyl-5-(4-(trifluoromethyl)benzylidene)oxazolidin-2-ylidene)-4-methylbenzenesulfonamide (9rA).** The title compound was prepared according to General Procedure A using (*E*)-*N*-benzylideneaniline (0.051 g, 0.28 mmol), 1-ethynyl-4-(trifluoromethyl)benzene (0.058 g, 0.34 mmol), *p*-toluenesulfonyl isocyanate (0.067 g, 52  $\mu$ L, 0.34 mmol), and Ph<sub>3</sub>PAuNTf<sub>2</sub> (0.0104 g, 0.014 mmol) in chloroform. After 48 h at 50 °C, <sup>1</sup>H NMR analysis of the crude mixture gave the diastereomeric ratio: >20:1. The reaction mixture was concentrated to dryness and then recrystallized (scratching with a glass rod was necessary to initiate crystallization) from ethanol (2.0 mL) to afford the title compound (0.113 g, 0.21 mmol, 75% yield) as a white solid. Analytical data for the title compound: **IR** (thin film, cm<sup>-1</sup>) 1629, 1321, 1159, 1088, 1067, 766; **<sup>1</sup>H NMR** (400 MHz, CDCl<sub>3</sub>, 298 K)  $\delta$  7.91 (d, *J* = 8.3 Hz, 2H), 7.73 (d, *J* = 8.2 Hz, 2H), 7.61 (d, *J* = 8.3 Hz, 2H), 7.38–7.18 (m, 11H), 7.13 (tt, *J* = 7.1, 1.4 Hz, 1H), 5.99 (d, *J* = 1.8 Hz, 1H), 5.49 (d, *J* = 2.0 Hz, 1H), 2.37 (s, 3H); **<sup>13</sup>C NMR** (100 MHz, CDCl<sub>3</sub>, 298 K)  $\delta$  152.7, 148.9, 142.9, 139.5, 135.8, 135.7, 134.3, 129.7, 129.4, 129.3, 129.2 (q, *J* = 32.4 Hz), 129.1, 128.8, 127.6, 127.1, 126.6, 125.4 (q, *J* = 3.7 Hz), 124.0 (q, *J* = 270.0 Hz), 124.0, 105.5, 66.2, 21.4; **<sup>19</sup>F NMR** (374 MHz, CDCl<sub>3</sub>)  $\delta$  61.76 (s, 3F); **TLC** (30% EtOAc/hexanes) R<sub>f</sub> 0.33; **HRMS** (ESI) calc for [C<sub>30</sub>H<sub>23</sub>O<sub>3</sub>N<sub>2</sub>F<sub>3</sub>S+H]<sup>+</sup>: *m/z* 549.1454, found 549.1452.

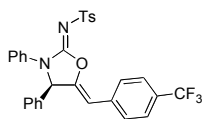

**(Z)-N-((R,Z)-3,4-diphenyl-5-(4-(trifluoromethyl)benzylidene)oxazolidin-2-ylidene)-4-**

**methylbenzenesulfonamide ((R)-9rA).** The title compound was prepared according to General Procedure B using (*E*)-*N*-benzylideneaniline (0.025 g, 0.14 mmol), 1-ethynyl-4-(trifluoromethyl)benzene (0.036 g, 0.17 mmol), *p*-toluenesulfonyl isocyanate (0.033 g, 25  $\mu$ L, 0.17 mmol), (*S,S*)-**L4**AuCl (0.0058 g, 0.007 mmol), and AgNTf<sub>2</sub> (0.0027 g, 0.007 mmol) in toluene. After 6 days, <sup>1</sup>H NMR analysis of the crude mixture gave the diastereomeric ratio: >20:1. The title compound (0.065 g, 0.119 mmol, 85% yield, 72% ee) was isolated as a white solid after flash chromatography, eluting with a gradient from 25 to 30% ethyl acetate/hexanes. Analytical data for the title compound: **HPLC** (Chiral Technology Chiral Pak IA, hexane/IPA= 65:35, flow rate=1 ml/min) T<sub>R</sub> (major) 9.4 min, T<sub>R</sub> (minor) 44.5 min.

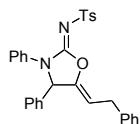

**(Z)-N-((Z)-3,4-diphenyl-5-(2-phenylethylidene)oxazolidin-2-ylidene)-4-methylbenzenesulfonamide (9sA).** The title compound was prepared according to General Procedure A using (*E*)-*N*-benzylideneaniline (0.051 g, 0.28 mmol), 3-phenyl-1-propyne (0.040 g, 0.34 mmol), *p*-toluenesulfonyl isocyanate (0.067 g, 52  $\mu$ L, 0.34 mmol), and Ph<sub>3</sub>PAuNTf<sub>2</sub> (0.0104 g, 0.014 mmol) in chloroform. After 48 h at 50 °C, <sup>1</sup>H NMR analysis of the crude mixture gave the diastereomeric ratio: 15:1. The title compound (0.100 g, 0.20 mmol, 72% yield) was isolated as a white solid after flash chromatography, eluting with a gradient from 25 to 30% ethyl acetate/hexanes. Analytical data for the title compound: **IR** (thin film, cm<sup>-1</sup>) 1615, 1585, 1167, 1129, 891, 685; **<sup>1</sup>H NMR** (400 MHz, CDCl<sub>3</sub>, 298 K)  $\delta$  7.95 (d, *J* = 8.3 Hz, 2H), 7.33–7.16 (m, 14H), 7.12 (tt, *J* = 7.7, 1.3 Hz, 1H), 7.17–7.05 (m, 2H), 5.78 (d, *J* = 1.8 Hz, 1H), 4.75 (ddd, *J* = 8.5, 7.3, 2.1 Hz, 1H), 3.56 (dd, *J* = 15.2, 3.8 Hz, 1H), 3.40 (ddd, *J* = 15.3, 7.2, 1.6 Hz, 1H), 2.35 (s, 3H); **<sup>13</sup>C NMR** (100 MHz, CDCl<sub>3</sub>, 298 K)  $\delta$  153.2, 147.8, 142.6, 139.6, 138.9, 136.3, 134.5, 129.3, 129.1, 129.1, 129.0, 128.4, 128.2, 127.3, 127.0, 126.9, 126.3, 123.9, 106.0, 64.9, 31.2, 21.4; **TLC** (30% EtOAc/hexanes) R<sub>f</sub> 0.24; **HRMS** (ESI) calc for [C<sub>30</sub>H<sub>26</sub>O<sub>3</sub>N<sub>2</sub>S+H]<sup>+</sup>: *m/z* 495.1737, found 495.1737.

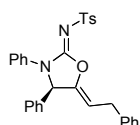

**(Z)-N-((R,Z)-3,4-diphenyl-5-(2-phenylethylidene)oxazolidin-2-ylidene)-4-methylbenzenesulfonamide ((R)-9sA).** The title compound was prepared according to General Procedure B using (*E*)-*N*-benzylideneaniline (0.025 g, 0.14 mmol), 3-phenyl-1-propyne (0.024 g, 0.17 mmol), *p*-toluenesulfonyl isocyanate (0.033 g, 25  $\mu$ L, 0.17 mmol), (*S,S*)-**L4**AuCl (0.0058 g, 0.007 mmol), and AgNTf<sub>2</sub> (0.0027 g, 0.007 mmol) in toluene. After 6 days, <sup>1</sup>H NMR analysis of the crude mixture gave the diastereomeric ratio: 6:1. The title compound (0.046 g, 0.092 mmol, 66% yield, 76% ee) was isolated as a white solid after flash chromatography, eluting with a

gradient from 25 to 30% ethyl acetate/hexanes. Analytical data for the title compound: **HPLC** (Chiral Technology Chiral Pak IB, hexane/IPA= 72:25, flow rate=1 ml/min)  $T_R$  (major) 10.5 min,  $T_R$  (minor) 12.3 min.

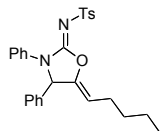

**(Z)-4-methyl-N-((Z)-5-pentylidene-3,4-diphenyloxazolidin-2-ylidene)benzenesulfonamide (9tA).** The title compound was prepared according to General Procedure A using (*E*)-*N*-benzylideneaniline (0.051 g, 0.28 mmol), 1-hexyne (0.028 g, 0.34 mmol), *p*-toluenesulfonyl isocyanate (0.067 g, 52  $\mu$ L, 0.34 mmol), and  $\text{Ph}_3\text{PAuNTf}_2$  (0.0104 g, 0.014 mmol) in chloroform. After 48 h at 50  $^\circ\text{C}$ ,  $^1\text{H}$  NMR analysis of the crude mixture gave the diastereomeric ratio: 1.6:1. The title compound (0.060 g, 0.13 mmol, 47% yield) was isolated as a white solid after flash chromatography, eluting with a gradient from 25 to 30% ethyl acetate/hexanes. Analytical data for the title compound: **IR** (thin film,  $\text{cm}^{-1}$ ) 1615, 1584, 1318, 1112, 892, 686;  $^1\text{H}$  NMR (400 MHz,  $\text{CDCl}_3$ , 298 K)  $\delta$  7.93 (d,  $J = 8.3$  Hz, 2H), 7.33–7.08 (m, 12H), 5.72 (d,  $J = 1.9$  Hz, 1H), 4.53 (td,  $J = 7.6, 2.1$  Hz, 1H), 2.41 (s, 3H), 2.25–2.05 (m, 2H), 1.31–1.20 (m, 4H), 0.92–0.84 (m, 3H);  $^{13}\text{C}$  NMR (100 MHz,  $\text{CDCl}_3$ , 298 K)  $\delta$  153.6, 147.3, 142.5, 139.7, 136.7, 134.7, 129.2, 129.1, 129.0, 129.0, 127.4, 127.2, 126.8, 124.0, 107.5, 65.0, 31.1, 24.7, 22.2, 21.5, 13.8; **TLC** (30% EtOAc/hexanes)  $R_f$  0.31; **HRMS** (ESI) calc for  $[\text{C}_{27}\text{H}_{28}\text{O}_3\text{N}_2\text{S}+\text{H}]^+$ :  $m/z$  461.1893, found 461.1890.

**General methods for preparing *N*-substituted 2-(diphenylphosphino)cyclohexanamines and their corresponding gold(I) complexes.** A flame-dried scintillation vial equipped with a magnetic stir bar was charged with (1*S*,2*S*)-2-(diphenylphosphino)cyclohexanamine and anhydrous methylene chloride (0.1–0.2 M) under  $\text{N}_2$  at room temperature. The requisite acylating agent (1.0–1.1 equiv) was then added. Triethylamine (1.1 equiv) was added prior to the acylating agent when chloroformates, acid chlorides, BOC anhydride, or diphosgene (for the preparation of the symmetrical *bis*-phosphine urea) was used. When the starting amine was fully consumed as judged by TLC analysis, the crude reaction mixture was loaded directly onto a silica column and eluted with the desired solvent mixture to afford the *N*-substituted phosphine.

A scintillation vial was charged with *N*-substituted phosphine (1.0 equiv),  $\text{Me}_2\text{S}\cdot\text{AuCl}^2$  (1.0 equiv), and methylene chloride (0.1 M phosphine) with no precautions to preclude air or moisture. The mixture was sonicated for 30 sec and allowed to stand at room temperature. After 30 min, the reaction was analyzed by  $^1\text{H}$  and  $^{31}\text{P}$  NMR. The mixture was filtered through glass microfiber and concentrated to ~0.5–1.0 mL. To this solution was layered diethyl ether (4 mL) and hexanes (8 mL) and allowed to stand in the dark for 24 hours. Alternatively, the phosphine gold(I) complex could be purified with flash chromatography, eluting with 1 or 2% methanol/methylene chloride.

The following acylating agents were commercially available: *p*-toluenesulfonyl isocyanate, phenyl isocyanate, 3,5-*bis*(trifluoromethyl)phenyl isocyanate, ethyl isocyanate, diphosgene, benzoyl isocyanate, 1-adamantanecarbonyl chloride, 2,4,6-triisopropylbenzoyl chloride, phthalic anhydride (phthlate prepared in toluene at 130 °C), and 3,5-*bis*(trifluoromethyl)phenyl isothiocyanate. *p*-Toluenesulfonyl chloride and 2,4,6-trimethylphenylsulfonyl chloride were also commercially available, but it was necessary to prepare the gold(I) chloride complex of (1*S*,2*S*)-2-(diphenylphosphino)cyclohexanamine prior to sulfonation. Without prior protection of the phosphine with gold(I), oxygen transfer from sulfur to phosphorus occurred during the sulfonation reaction to provide a mixture of diastereotopic sulfinyl urea phosphine oxides.

The *tert*-leucine-derived isocyanate was prepared by the procedure of Jacobsen.<sup>3</sup>

2,4,6-Trimethylbenzoyl isocyanate and 2,4,6-triisopropylbenzoyl isocyanate were synthesized by refluxing the corresponding primary amides with 3–6 equiv of oxalyl chloride in anhydrous dichloroethane (0.15 M amide) for 20 hours followed by concentration of the reaction mixture and use of the isocyanates without further purification.

2,5-Dimethylphenylsulfonyl isocyanate, 2,4,6-trimethylphenylsulfonyl isocyanate and 2,4,6-triisopropylphenylsulfonyl isocyanate were synthesized by refluxing the corresponding primary sulfonamides with *n*-butyl isocyanate (0.3 equiv) in chlorobenzene (0.15 M sulfonamide). To this refluxing solution was added diphosgene (2.0 equiv) dropwise over 2.5 hours. After <sup>1</sup>H NMR confirmed full conversion of the sulfonamide, the reaction was concentrated to dryness and the isocyanates were used directly without further purification.

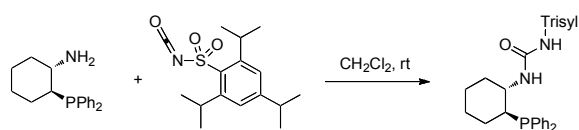

***N*-(((1*S*,2*S*)-2-(diphenylphosphino)cyclohexyl)carbamoyl)-2,4,6-triisopropylbenzenesulfonamide (L4).** A flame-dried scintillation vial equipped with a magnetic stir bar was charged with 2,4,6-triisopropylbenzenesulfonyl isocyanate (0.220 g, 0.71 mmol), (1*S*,2*S*)-2-(diphenylphosphino)cyclohexanamine (0.200 g, 0.71 mmol), and anhydrous methylene chloride (4.0 mL) under N<sub>2</sub>. After 3 h at room temperature, the crude reaction mixture was loaded directly onto a silica column and eluted with a gradient of 1 to 2% methanol/methylene chloride. The title compound (0.329 g, 0.55 mmol, 78% yield) was isolated as a white solid. Analytical data for the title compound: <sup>1</sup>H NMR (400 MHz, CDCl<sub>3</sub>, 298 K) δ 9.36 (br s, 1H), 7.59 (t, *J* = 7.0 Hz, 2H), 7.53–7.42 (m, 4H), 7.40–7.33 (m, 4H), 7.22 (s, 2H), 6.75 (br d, *J* = 8.1 Hz, 1H), 4.16 (sept, *J* = 6.7 Hz, 2H), 3.80–3.70 (m, 1H), 2.92 (sept, *J* = 6.9 Hz, 1H), 2.52–2.46 (m, 1H), 2.15–2.07 (m, 1H), 1.90–1.72 (m, 2H), 1.65–1.52 (m, 1H), 1.50–1.30 (m, 3H), 1.33 (d, *J* = 6.8 Hz, 6H), 1.31 (d, *J* = 6.8 Hz, 6H), 1.27 (d, *J* = 6.9 Hz, 3H), 1.27 (d, *J* = 6.9 Hz, 3H), 1.18–1.05 (m, 1H); <sup>13</sup>C NMR (100 MHz, CDCl<sub>3</sub>, 298 K) δ 153.5,

151.3, 150.4, 136.1 (d,  $J = 13.1$  Hz), 135.7 (d,  $J = 16.9$  Hz), 134.5 (d,  $J = 20.7$  Hz), 132.9, 132.6 (d,  $J = 18.3$  Hz), 128.9, 128.5 (d,  $J = 6.0$  Hz), 128.2, 128.1 (d,  $J = 7.7$  Hz), 123.9, 49.6 (d,  $J = 18.7$  Hz), 39.3 (d,  $J = 18.0$  Hz), 34.1, 31.3, 29.9, 25.4 (d,  $J = 3.7$  Hz), 24.9, 24.8, 24.7, 24.0, 23.5, 23.4, 23.3;  $^{31}\text{P}$  NMR (163 MHz,  $\text{CDCl}_3$ , 298 K)  $\delta -10.7$ ; HRMS (ESI) calc for  $[\text{C}_{34}\text{H}_{45}\text{O}_3\text{N}_2\text{PS}+\text{H}]^+$ :  $m/z$  593.2961, found 593.2951.

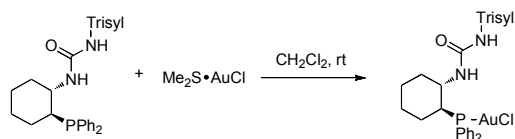

***N*-(((1*S*,2*S*)-2-(diphenylphosphino)cyclohexyl)carbamoyl)-2,4,6-triisopropylbenzenesulfonamide gold(I) chloride ((*S,S*)-L4AuCl).** A scintillation vial was charged with *N*-(((1*S*,2*S*)-2-(diphenylphosphino)cyclohexyl)carbamoyl)-2,4,6-triisopropylbenzenesulfonamide (**L4**) (0.450 g, 0.76 mmol),  $\text{Me}_2\text{S}\cdot\text{AuCl}^2$  (0.224 g, 0.76 mmol), and methylene chloride (6.0 mL) with no precautions to preclude air or moisture. The mixture was sonicated for 30 sec and allowed to stand at room temperature. After 30 min, the reaction was judged complete by  $^1\text{H}$  and  $^{31}\text{P}$  NMR. The mixture was filtered through glass microfiber and concentrated to  $\sim 1.5$  mL. To this solution was layered diethyl ether (4 mL) and hexanes (8 mL) and allowed to stand in the dark for 24 hours. The white precipitate was isolated by filtration and washed with 10% methylene chloride/hexanes (5 mL) to afford the title compound (0.505 g, 0.61 mmol, 81% yield) as a white solid. Analytical data for the title compound:  $^1\text{H}$  NMR (400 MHz,  $\text{CDCl}_3$ , 298 K)  $\delta$  8.18 (br s, 1H), 8.03–7.94 (m, 2H), 7.81–7.74 (m, 2H), 7.52–7.37 (m, 6H), 7.12 (s, 2H), 6.38 (br d,  $J = 8.0$  Hz, 1H), 3.92 (sept,  $J = 6.7$  Hz, 2H), 3.98–3.85 (m, 1H), 3.23–3.12 (m, 1H), 2.87 (sept,  $J = 6.9$  Hz, 1H), 2.15–1.96 (m, 2H), 1.80–1.65 (m, 1H), 1.65–1.30 (m, 5H), 1.21 (d,  $J = 7.0$  Hz, 12H), 1.19 (d,  $J = 6.9$  Hz, 6H);  $^{13}\text{C}$  NMR (100 MHz,  $\text{CDCl}_3$ , 298 K)  $\delta$  153.7, 150.5, 150.3, 134.1 (d,  $J = 13.7$  Hz), 134.0 (d,  $J = 13.3$  Hz), 132.6, 132.1 (d,  $J = 2.5$  Hz), 131.8 (d,  $J = 2.6$  Hz), 129.4 (d,  $J = 11.9$  Hz), 129.2 (d,  $J = 11.6$  Hz), 128.7 (d,  $J = 59.8$  Hz), 128.0 (d,  $J = 58.6$  Hz), 127.7, 50.7 (d,  $J = 3.4$  Hz), 38.8 (d,  $J = 35.2$  Hz), 34.1, 31.0 (d,  $J = 8.4$  Hz), 29.8, 25.7 (d,  $J = 4.0$  Hz), 24.8, 23.6 (d,  $J = 9.7$  Hz), 23.5, 23.4, 23.0;  $^{31}\text{P}$  NMR (163 MHz,  $\text{CDCl}_3$ , 298 K)  $\delta$  40.0; HRMS (ESI) calc for  $[\text{C}_{34}\text{H}_{45}\text{O}_3\text{N}_2\text{AuClPS}+\text{Na}]^+$ :  $m/z$  847.2135, found 847.2130.

**Scheme S1. Preparation of gold(I) complexes from L22-L37**

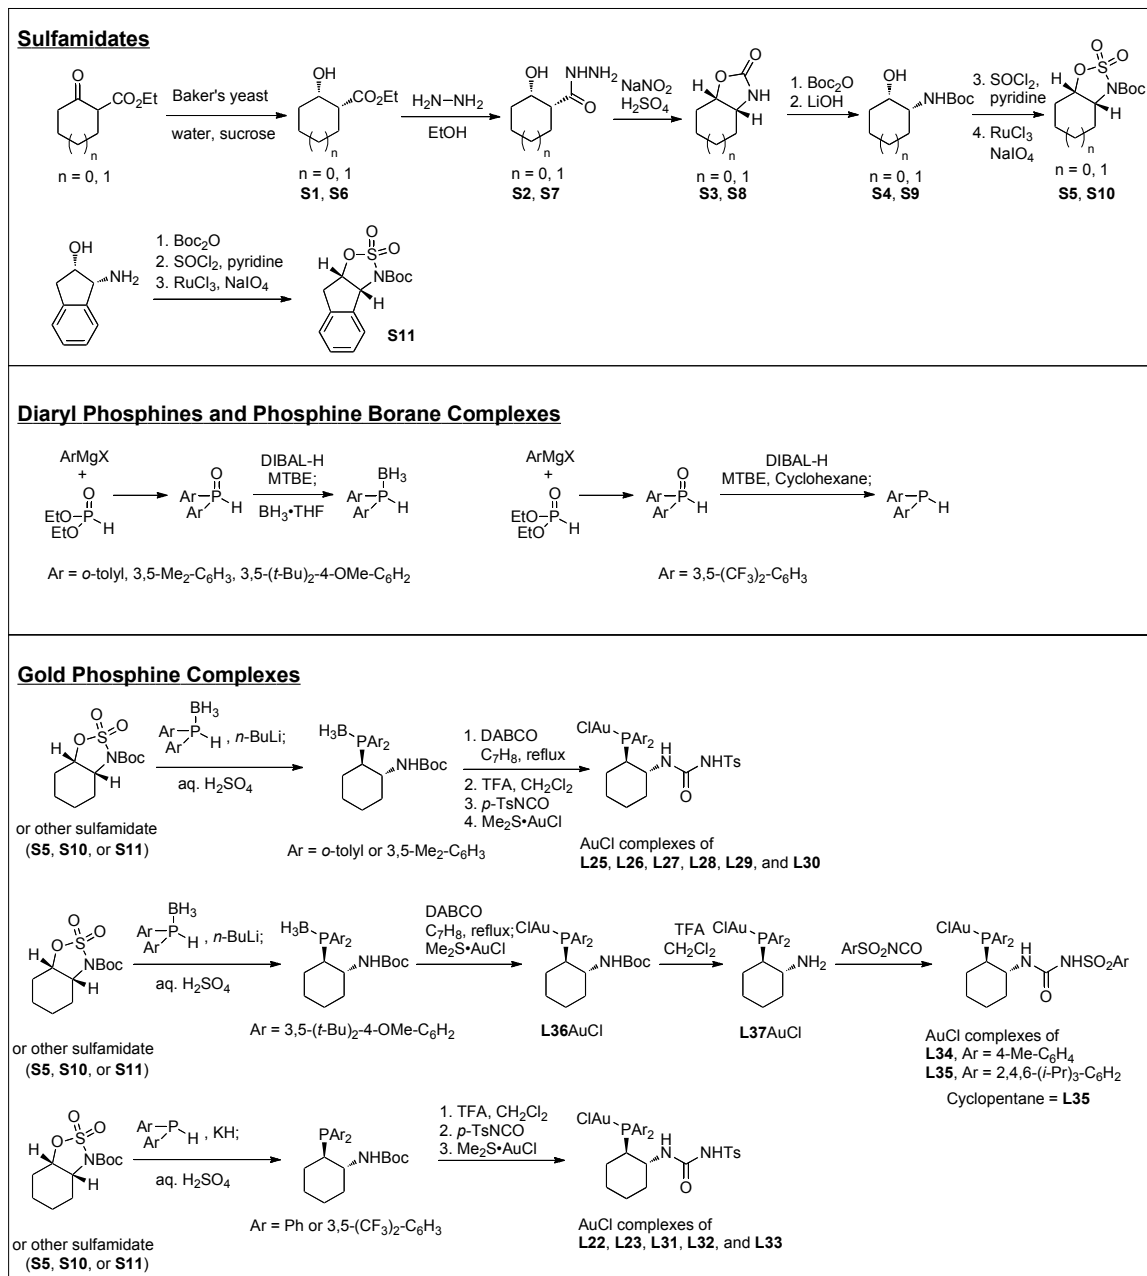



**(1*R*,2*S*)-Ethyl 2-hydroxycyclopentanecarboxylate.** The title compound was prepared by a modification of the procedure of Bertau.<sup>4</sup> Sucrose (625 g) was dissolved in deionized water (3.25 L) and heated to 30 °C with overhead stirring. Baker's yeast (250 g) was then added and allowed to stir without heating for 1 h. Ethyl 2-oxocyclopentanecarboxylate (39.0 g, 36.2 mL, 250 mmol) was added at once and stirred at room temperature. The reaction was judged complete after 18 hours (TLC analysis) at which time Celite (150 g) was added. The reaction mixture was filtered through a 7" Buchner funnel, washing the cake with water (200 mL). The combined water layers were saturated with NaCl and extracted with diethyl ether (5 x 500 mL). The combined organic layers were dried with MgSO<sub>4</sub>, filtered, and concentrated. The residue was distilled (75–80 °C, 0.5 mbar) to give the title compound as a clear, colorless oil (32.1 g, 203 mmol, 81%). The analytical data was consistent with that reported in the literature.<sup>5</sup>

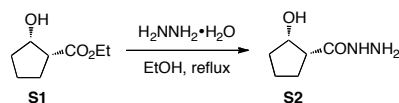

**(1*R*,2*S*)-2-Hydroxycyclopentanecarbohydrazide.** The title compound was prepared by a modification of the procedure of Bertau.<sup>4</sup> To a 100 mL round-bottomed flask equipped with a magnetic stir bar and a condenser was added (1*R*,2*S*)-ethyl 2-hydroxycyclopentanecarboxylate (31.0 g, 196 mmol), hydrazine hydrate (15.7 g, 15.3 mL, 314 mmol), and absolute ethanol (16 mL). The mixture was heated to reflux for 2.4 h. The solvent was removed. The residue was taken up in ethanol (250 mL) and diluted with 1,2-dichloroethane (400 mL) to initiate crystallization. The fine, long, colorless crystals were filtered to leave the title compound (20.2 g). The filtrate was concentrated and again crystallized to obtain a second crop (6.0 g) to give a total of 26.2 g (182 mmol, 93% yield). The analytical data was consistent with that reported in the literature.<sup>6</sup> <sup>1</sup>H NMR (400 MHz, *d*<sub>6</sub>-DMSO, 298 K) δ 8.97 (br s, 1H), 4.72 (d, *J* = 3.0 Hz, 1H), 4.18 (br s, 3H), 2.38 (ddd, *J* = 9.9, 8.3, 4.6 Hz, 1H), 1.95–1.80 (m, 1H), 1.80–1.43 (m, 5H); <sup>13</sup>C NMR (125 MHz, *d*<sub>6</sub>-DMSO, 298 K) δ 172.7, 73.3, 47.7, 34.3, 25.9, 21.5.

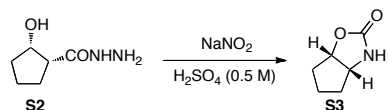

**(3*aR*,6*aS*)-Perhydrocyclopenta[d]oxazol-2-one.** The title compound was prepared by a modification of the procedure of Bertau.<sup>4</sup> To a 1.0 L Erlenmeyer flask equipped with a magnetic stir bar was added (1*R*,2*S*)-2-hydroxycyclopentanecarbohydrazide (22.7 g, 157 mmol) and 0.5 M aqueous H<sub>2</sub>SO<sub>4</sub> (360 mL). After dissolution, the solution was cooled to –2 °C. A solution of NaNO<sub>2</sub> (19.6 g, 283 mmol) in water (250 mL) was added dropwise over 1 h. After the addition the mixture was allowed to reach room temperature naturally over ~3 h. The reaction was then stirred at room temperature for 18 hours. The solution was saturated with NaCl and cooled in an ice bath to crystallize the product, which was filtered and washed with sat. aqueous NaCl (100

mL). The residue was extracted with methylene chloride (2 x 60 mL), dried with Na<sub>2</sub>SO<sub>4</sub>, filtered, and evaporated to leave the title compound (8.77 g, 69 mmol, 44% yield) as a white solid. The analytical data was consistent with that reported in the literature.<sup>7</sup> <sup>1</sup>H NMR (400 MHz, CDCl<sub>3</sub>, 298 K) δ 5.59 (br s, 1H), 5.06 (dd, *J* = 7.0, 5.8 Hz, 1H), 4.27 (t, *J* = 6.6 Hz, 1H), 2.15–2.05 (m, 1H), 1.90–1.50 (m, 5H); <sup>13</sup>C NMR (125 MHz, CDCl<sub>3</sub>, 298 K) δ 160.4, 82.1, 56.6, 34.2, 33.6, 21.7;

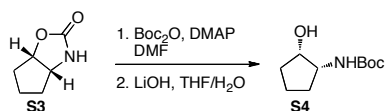

***tert*-Butyl ((1*R*,2*S*)-2-hydroxycyclopentyl)carbamate.** To a 250 mL round-bottomed flask equipped with a magnetic stir bar was added (3*R*,6*aS*)-perhydrocyclopenta[*d*]oxazol-2-one (3.9 g, 30.7 mmol), 4-(dimethylamino)pyridine (1.88 g, 15.4 mmol), and anhydrous DMF (80 mL). To this solution was added Boc<sub>2</sub>O (8.7 g, 40.0 mmol) and allowed to stir at room temperature for 1 h. The reaction was quenched with sat. aqueous NH<sub>4</sub>Cl (60 mL) and extracted with ethyl acetate (3 x 60 mL). The combined organic layers were washed with 5% aqueous NaCl (4 x 50 mL), sat. aqueous NaCl (40 mL), dried with MgSO<sub>4</sub>, filtered and evaporated. The residue was dissolved in THF (100 mL) and cooled to 0 °C. A solution of LiOH (7.4 g, 310 mmol) in water (75 mL) was added dropwise at 0 °C and allowed to warm to room temperature naturally overnight. The solution was saturated with NaCl and extracted with ethyl acetate (3 x 150 mL). The combined organic layers were dried with MgSO<sub>4</sub>, filtered, and evaporated. The residue was purified on a 1'' silica plug, eluting first with 30% ethyl acetate/hexanes to yield the title compound (3.12 g, 15.5 mmol, 50% yield), then with ethyl acetate to provide (3*R*,6*aS*)-perhydrocyclopenta[*d*]oxazol-2-one. The analytical data was consistent with that reported in the literature.<sup>8</sup> <sup>1</sup>H NMR (400 MHz, CDCl<sub>3</sub>, 298 K) δ 5.05 (br d, *J* = 7.6 Hz, 1H), 4.09 (br s, 1H), 3.75 (br s, 1H), 2.69 (br s, 1H), 2.00–1.70 (m, 3H), 1.67–1.45 (m, 3H), 1.41 (s, 9H).

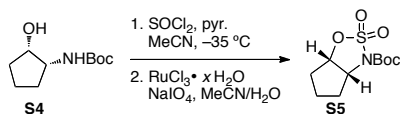

**(3*aR*,6*aS*)-*tert*-Butyl tetrahydrocyclopenta[*d*][1,2,3]oxathiazole-3(3*aH*)-carboxylate 2,2-dioxide.** To a flame-dried 250 mL round-bottomed flask equipped with a magnetic stir bar was added anhydrous acetonitrile (35 mL) and thionyl chloride (5.25 g, 3.20 mL, 44.1 mmol) under N<sub>2</sub>. The solution was cooled to –45 °C. Then a solution of *tert*-butyl ((1*R*,2*S*)-2-hydroxycyclopentyl)carbamate (3.55 g, 17.6 mmol) in acetonitrile (20 mL) was added dropwise, maintaining the temperature at –45 °C. Pyridine (7.10 mL, 88 mmol) was added slowly and stirred at –45 °C for 2 h. Then the reaction was allowed to slowly warm to room temperature over 3 h. The solvents were removed and the residue was taken up in ethyl acetate (100 mL) and water (20 mL). The organic layer was washed with sat. aqueous NaCl (10 mL). The combined aqueous layers were back-extracted with ethyl acetate (20 mL). The combined organic layers were washed with sat. aqueous NaCl (10 mL), dried with

MgSO<sub>4</sub>, filtered, and evaporated. The residue was dissolved in acetonitrile (30 mL) and water (30 mL). Ruthenium(III) chloride hydrate (0.009 g, 0.04 mmol) was added and the mixture was cooled to 0 °C. NaIO<sub>4</sub> (5.65 g, 26.4 mmol) was added and the reaction was allowed to warm to room temperature with stirring for 2 h. The mixture was extracted with diethyl ether (2 x 50 mL), washed with sat. aqueous NaCl (10 mL), dried with MgSO<sub>4</sub>, filtered, and evaporated. The residue was taken up in methylene chloride (15 mL) and then diluted with hexanes (300 mL) to yield the title compound (2.60 g, 9.88 mmol, 56% yield) as an off-white precipitate. The analytical data was consistent with that reported in the literature.<sup>9</sup> **<sup>1</sup>H NMR** (400 MHz, CDCl<sub>3</sub>, 298 K) δ 5.18–5.13 (m, 1H), 4.58–4.52 (m, 1H), 2.25–2.15 (m, 1H), 2.08–1.92 (m, 3H), 1.90–1.75 (m, 2H), 1.55 (s, 9H); **<sup>13</sup>C NMR** (125 MHz, CDCl<sub>3</sub>, 298 K) δ 148.8, 84.9, 83.5, 61.0, 32.5, 32.0, 27.7, 22.4; **HRMS** (ESI) calc for [C<sub>10</sub>H<sub>17</sub>O<sub>5</sub>NS+Na]<sup>+</sup>: *m/z* 286.0720, found 286.0722.

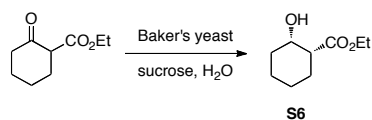

**(1R,2S)-Ethyl 2-hydroxycyclohexanecarboxylate.** The title compound was prepared by a modification of the procedure of Bertau.<sup>4</sup> Sucrose (390 g) was dissolved in deionized water (2.0 L) and heated to 30 °C with overhead stirring. Baker's yeast (156 g) was then added and allowed to stir without heating for 1 h. Ethyl 2-oxocyclohexanecarboxylate (26.6 g, 25.0 mL, 156 mmol) was added at once and stirred at room temperature. The reaction was judged complete after 18 hours (TLC analysis) at which time Celite (200 g) was added. The reaction mixture was filtered through a 7" Buchner funnel, washing the cake with water (200 mL). The combined water layers were saturated with NaCl and extracted with diethyl ether (4 x 500 mL). The combined organic layers were dried with MgSO<sub>4</sub>, filtered, and concentrated. The residue was distilled (91–95 °C, 0.5 mbar) to give the title compound as a clear, colorless oil (19.2 g, 111 mmol, 71%). The analytical data was consistent with that reported in the literature.<sup>10</sup>

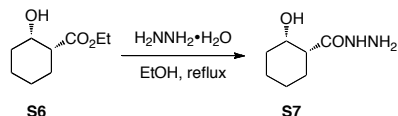

**(1R,2S)-2-Hydroxycyclohexanecarbohydrazide.** The title compound was prepared by a modification of the procedure of Bertau.<sup>4</sup> To a 100 mL round-bottomed flask equipped with a magnetic stir bar and a condenser was added (1R,2S)-ethyl 2-hydroxycyclohexanecarboxylate (8.0 g, 46.5 mmol), hydrazine hydrate (3.7 g, 3.6 mL, 74.4 mmol), and absolute ethanol (4 mL). The mixture was heated to reflux for 2.5 h. The solvent was removed. The residue was recrystallized from CH<sub>2</sub>Cl<sub>2</sub> (20 mL), cooling to –30 °C. The fine, long, colorless crystals were filtered to leave the title compound (6.05 g, 38.2 mmol, 82% yield). The analytical data was consistent with that reported in the literature.<sup>6</sup> **<sup>1</sup>H NMR** (400 MHz, *d*<sub>6</sub>-DMSO, 298 K) δ 8.93 (br s, 1H), 3.92–

3.87 (m, 1H), 3.82 (br s, 3H), 2.14 (ddd,  $J = 11.5, 3.9, 2.7$  Hz, 1H), 1.76–1.48 (m, 4H), 1.42–1.22 (m, 3H), 1.22–1.10 (m, 1H).

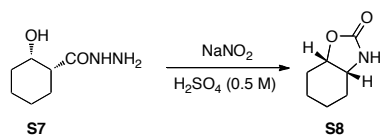

**(3aR,7aS)-Hexahydrobenzo[d]oxazol-2(3H)-one.** The title compound was prepared by a modification of the procedure of Bertau.<sup>4</sup> To a 150 mL Erlenmeyer flask equipped with a magnetic stir bar was added (1R,2S)-2-hydroxycyclohexanecarbohydrazide (5.55 g, 35.1 mmol) and 0.5 M aqueous H<sub>2</sub>SO<sub>4</sub> (88 mL). After dissolution, the solution was cooled to 0 °C. A solution of NaNO<sub>2</sub> (4.4 g, 63.5 mmol) in water (66 mL) was added dropwise over 30 min. After the addition the mixture was allowed to reach room temperature naturally over ~3 h. The reaction was then stirred at room temperature for 21 hours. The solution was saturated with NaCl. The residue was extracted with methylene chloride (3 x 60 mL), dried with Na<sub>2</sub>SO<sub>4</sub>, filtered, and evaporated to leave the title compound (2.97 g, 20.9 mmol, 60% yield) as a white solid. The analytical data was consistent with that reported in the literature.<sup>7</sup> <sup>1</sup>H NMR (300 MHz, CDCl<sub>3</sub>, 298 K)  $\delta$  6.40 (br s, 1H), 4.55 (dt,  $J = 6.5, 4.8$  Hz, 1H), 3.72 (q,  $J = 6.6$  Hz, 1H), 2.00–1.88 (m, 1H), 1.85–1.65 (m, 2H), 1.65–1.32 (m, 4H), 1.32–1.15 (m, 1H).

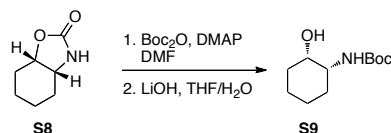

**tert-Butyl ((1R,2S)-2-hydroxycyclohexyl)carbamate.** To a 250 mL round-bottomed flask equipped with a magnetic stir bar was added (3aR,7aS)-hexahydrobenzo[d]oxazol-2(3H)-one (2.97 g, 20.9 mmol), 4-(dimethylamino)pyridine (1.28 g, 10.5 mmol), and anhydrous DMF (60 mL). To this solution was added Boc<sub>2</sub>O (5.96 g, 27.3 mmol) and allowed to stir at room temperature for 2 h. The reaction was quenched with sat. aqueous NH<sub>4</sub>Cl (40 mL) and extracted with ethyl acetate (3 x 50 mL). The combined organic layers were washed with 5% aqueous NaCl (4 x 25 mL), aqueous HCl (1M, 25 mL), sat. aqueous NaCl (25 mL), dried with MgSO<sub>4</sub>, filtered and evaporated. The residue was dissolved in THF (100 mL) and cooled to 0 °C. A solution of LiOH (4.68 g, 195 mmol) in water (39 mL) was added at once at room temperature and stirred for 2 h. The solution was extracted with ethyl acetate (3 x 100 mL). The combined organic layers were dried with MgSO<sub>4</sub>, filtered, and evaporated. The residue was purified on a 1" silica plug, eluting first with 30% ethyl acetate/hexanes to yield the title compound (3.55 g, 16.5 mmol, 79% yield). The analytical data was consistent with that reported in the literature.<sup>11</sup> <sup>1</sup>H NMR (400 MHz, CDCl<sub>3</sub>, 298 K)  $\delta$  4.95 (br d,  $J = 6.8$  Hz, 1H), 3.95–3.88 (m, 1H), 3.58 (br s, 1H), 2.35 (br s, 1H), 1.77–1.65 (m, 1H), 1.65–1.47 (m, 5H), 1.46–1.25 (m, 2H), 1.42 (s, 9H).

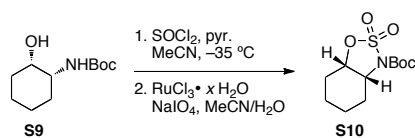

**(3aR,7aS)-tert-Butyl hexahydro-3H-benzo[d][1,2,3]oxathiazole-3-carboxylate 2,2-dioxide.** To a flame-dried 250 mL round-bottomed flask equipped with a magnetic stir bar was added anhydrous acetonitrile (45 mL) and thionyl chloride (4.84 g, 2.95 mL, 40.7 mmol) under N<sub>2</sub>. The solution was cooled to -40 °C. Then a solution of *tert*-butyl ((1*R*,2*S*)-2-hydroxycyclohexyl)carbamate (3.50 g, 16.3 mmol) in acetonitrile (20 mL) and anhydrous methylene chloride (20 mL) was added dropwise, maintaining the temperature at -40 °C. Pyridine (6.56 mL, 81.3 mmol) was added slowly and stirred at -40 °C for 1 h. Then the reaction was allowed to slowly warm to room temperature over 3 h. The solvents were removed and the residue was taken up in ethyl acetate (60 mL) and water (40 mL). The organic layer was washed with sat. aqueous NaCl (3 x 10 mL), dried with MgSO<sub>4</sub>, filtered, and evaporated. The residue was dissolved in acetonitrile (60 mL) and methylene chloride (12 mL). Ruthenium(III) chloride hydrate (0.030 g, 0.13 mmol) was added and the mixture was cooled to 0 °C. NaIO<sub>4</sub> (9.27 g, 43.4 mmol) in water (60 mL) was added and the reaction was allowed to warm to room temperature with stirring for 3 h. The mixture was extracted with diethyl ether (2 x 100 mL), washed with sat. aqueous NaCl (2 x 25 mL), dried with MgSO<sub>4</sub>, filtered, and evaporated. The crude product was passed through a 1" silica plug, eluting with methylene chloride. The residue was taken up in methylene chloride (15 mL) and then diluted with hexanes (300 mL) to yield the title compound (2.75 g, 9.9 mmol, 61% yield) as white needles. The analytical data was consistent with that reported in the literature.<sup>9</sup> <sup>1</sup>H NMR (400 MHz, CDCl<sub>3</sub>, 298 K) δ 4.95 (q, *J* = 3.3 Hz, 1H), 4.14 (ddd, *J* = 10.6, 6.0, 4.3 Hz, 1H), 2.35–2.25 (m, 2H), 1.85–1.58 (m, 4H), 1.58–1.45 (m, 1H), 1.54 (s, 9H), 1.21 (tdt, *J* = 13.8, 12.5, 3.3 Hz, 1H).

#### Procedure for the preparation of gold(I) complexes with L22-L37

Procedures were used in direct analogy with the published procedures by Guo<sup>9</sup> for phosphide sulfamidate ring-opening, borane phosphide deprotection, and Boc-deprotection in the sequence provided by scheme S1 (page S24).<sup>9</sup> Formation of sulfonylureas and gold complexation was analogous to that reported for L4. Phosphines and phosphide borane complexes were prepared by the method of Buscaccia.<sup>12, 13</sup>

**General procedure for screening catalysts: the asymmetric addition of phenylacetylene to (*E*)-*N*-benzylideneaniline.** A stock solution of (*E*)-*N*-benzylideneaniline (0.0034 g, 0.019 mmol/100 μL methylene chloride) and phenylacetylene (0.0039 g, 0.038 mmol/100 μL methylene chloride) was prepared. The stock solution (100 μL) was added to an amber vial. In a separate amber vial was prepared a stock solution of the desired gold(I) catalyst with the corresponding gold(I) chloride complex (0.011 mmol/100 μL methylene chloride) and AgNTf<sub>2</sub> (0.0003 g, 0.008 mmol/100 μL methylene chloride). This mixture was sonicated for 30

seconds and then filtered through glass microfiber to afford a colorless solution of the catalyst. The catalyst solution (100  $\mu$ L) was added quickly to the first vial, which was then sealed with a PTFE-lined screw cap (imine molarity  $\sim$ 0.1 M). The reaction was left to stand at room temperature for 3 h. The reaction mixture was then directly loaded onto a Monster-pette packed with silica and purified via flash chromatography, eluting with 2.5% ethyl acetate/hexanes. Modification of these standard reaction parameters (solvent, silver salt, concentration, catalyst loading, additives) was made accordingly when desired. The enantiomeric excess of the purified propargyl amine was determined by HPLC analysis. HPLC (Chiral Technology Chiral Pak AD-H, hexane/IPA= 95:5, flow rate=1 ml/min)  $T_R$  (*S* enantiomer) 9.5 min,  $T_R$  (*R* enantiomer) 10.5 min.

## References

1. N. Mézailles, L. Ricard and F. Gagosz, *Org. Lett.*, 2005, **7**, 4133-4136.
2. N. Nishina and Y. Yamamoto, *Synlett*, 2007, **2007**, 1767,1770.
3. Y.-Q. Fang and E. N. Jacobsen, *J. Am. Chem. Soc.*, 2008, **130**, 5660-5661.
4. M. Bertau, M. Bürli, E. Hungerbühler and P. Wagner, *Tetrahedron: Asymmetry*, 2001, **12**, 2103-2107.
5. K. Kanai, H. Wakabayashi and T. Honda, *Org. Lett.*, 2000, **2**, 2549-2551.
6. F. Fulop, E. Semega, G. Dombi and G. Bernáth, *J. Het. Chem.*, 1990, **27**, 951-955.
7. J. R. Dehli and V. Gotor, *J. Org. Chem.*, 2002, **67**, 6816-6819.
8. A. Cerri, M. Torri, S. Armaroli, L. Banfi, G. Bianchi, G. Carzana, P. Ferrari, R. Micheletti, S. Sputore, and M. P. Zappavigna, WO2007118832, 2007.
9. R. Guo, S. Lu, X. Chen, C.-W. Tsang, W. Jia, C. Sui-Seng, D. Amoroso and K. Abdur-Rashid, *J. Org. Chem.*, 2009, **75**, 937-940.
10. O. Kanno and I. Kawamoto, *Tetrahedron*, 2000, **56**, 5639-5648.
11. T. Ohkuma, D. Ishii, H. Takeno and R. Noyori, *J. Am. Chem. Soc.*, 2000, **122**, 6510-6511.
12. C. A. Busacca, J. C. Lorenz, N. Grinberg, N. Haddad, M. Hrapchak, B. Latli, H. Lee, P. Sabila, A. Saha, M. Sarvestani, S. Shen, R. Varsolona, X. Wei and C. H. Senanayake, *Org. Lett.*, 2005, **7**, 4277-4280.
13. C. A. Busacca, J. C. Lorenz, P. Sabila, N. Haddad and C. H. Senanyake, *Org. Synth.*, 2007, **84**, 242.



# <sup>1</sup>H NMR, <sup>13</sup>C NMR, <sup>19</sup>F NMR Spectra and HPLC Traces

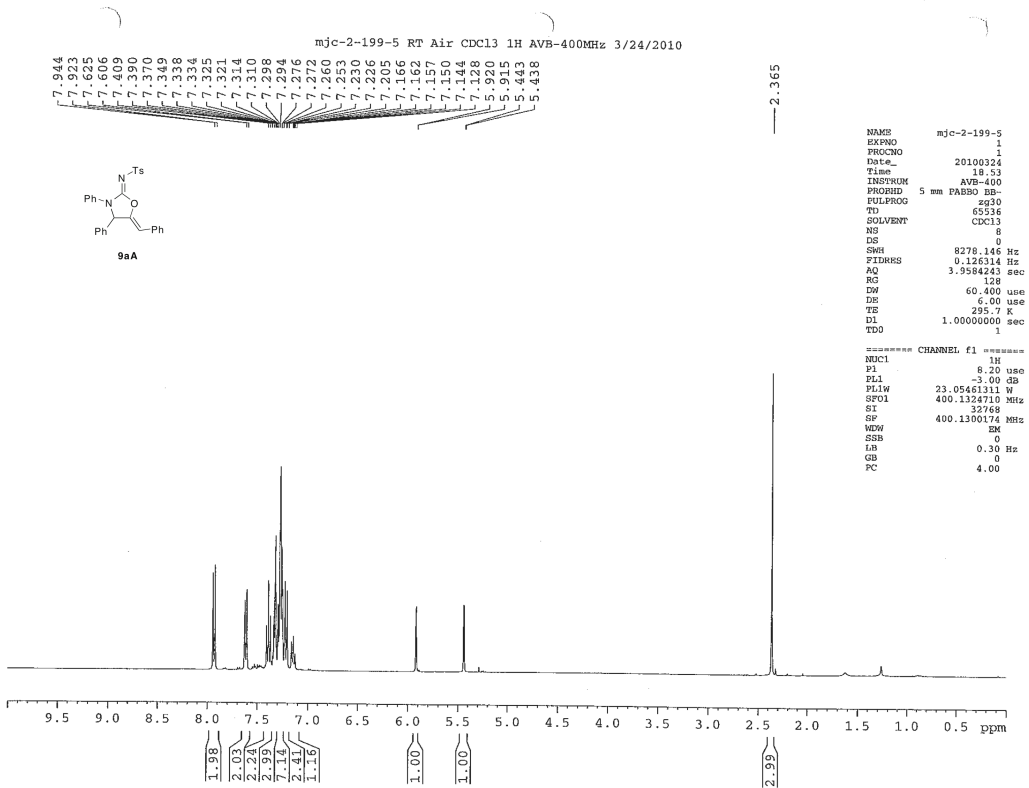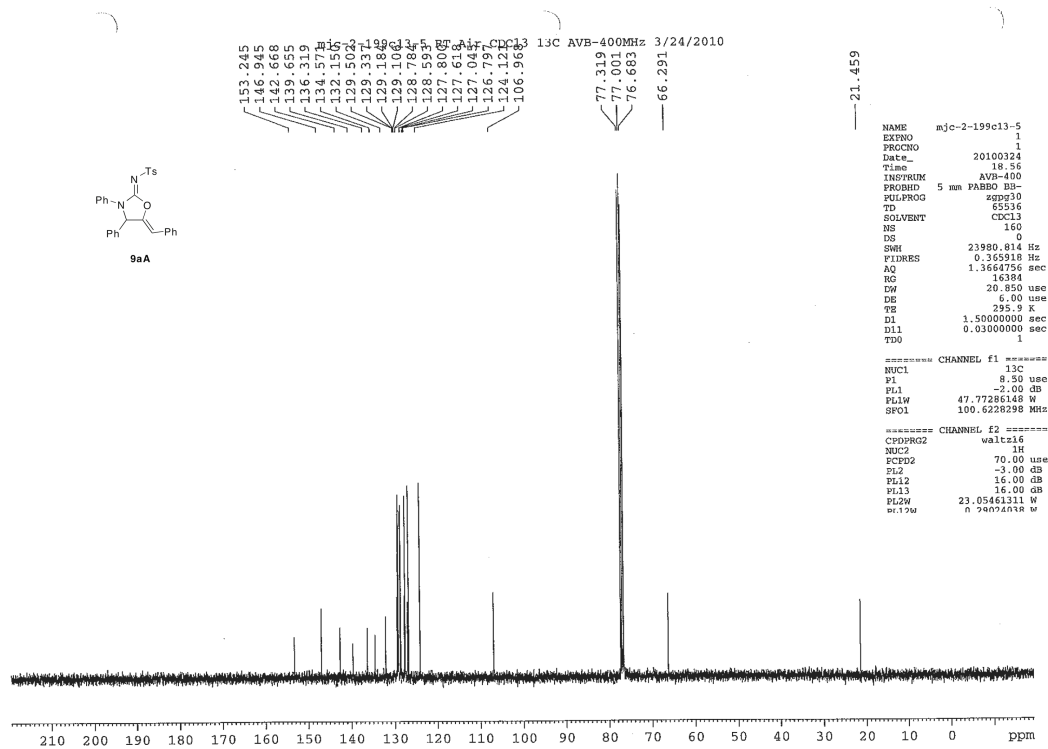



# <sup>1</sup>H NMR, <sup>13</sup>C NMR, <sup>19</sup>F NMR Spectra and HPLC Traces

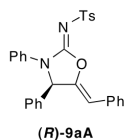

mjc-2-199-5  
C:\EZStart\Projects\Default\Data\Campbell\Published Traces\mjc-2-199-5  
IA6535IP\_30min.met3-25-2010 10-54-21 AM.dat

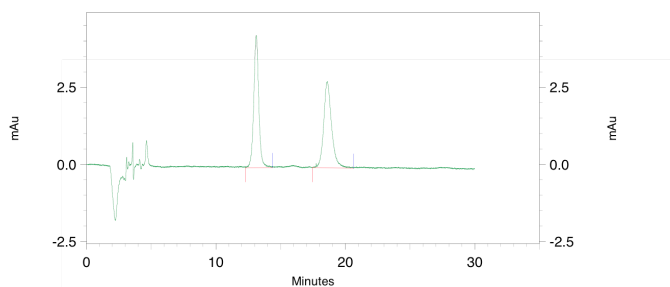

5: 288 nm, 4  
nm Results

| Retention Time | Area   | Area Percent | Lambda Max |
|----------------|--------|--------------|------------|
| 13.120         | 115688 | 49.295       | 207        |
| 18.612         | 118997 | 50.705       | 262        |

mjc-4-165-A  
C:\EZStart\Projects\Default\Data\Campbell\Published Traces\mjc-4-165-A  
IA6535IP\_30min.met1-24-2011 7-45-31 PM.dat

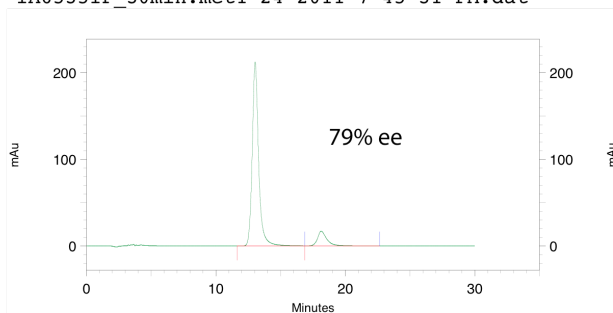

5: 288 nm, 4  
nm Results

| Retention Time | Area    | Area Percent | Lambda Max |
|----------------|---------|--------------|------------|
| 13.032         | 7318932 | 89.407       | 208        |
| 18.132         | 867152  | 10.593       | 207        |

# <sup>1</sup>H NMR, <sup>13</sup>C NMR, <sup>19</sup>F NMR Spectra and HPLC Traces

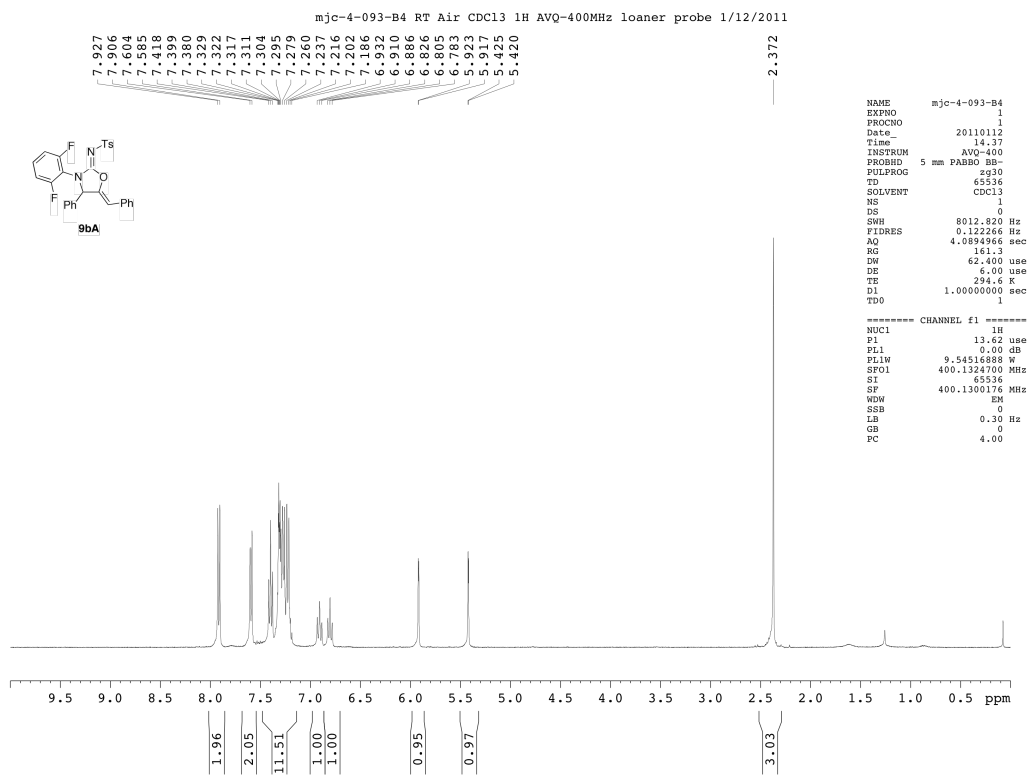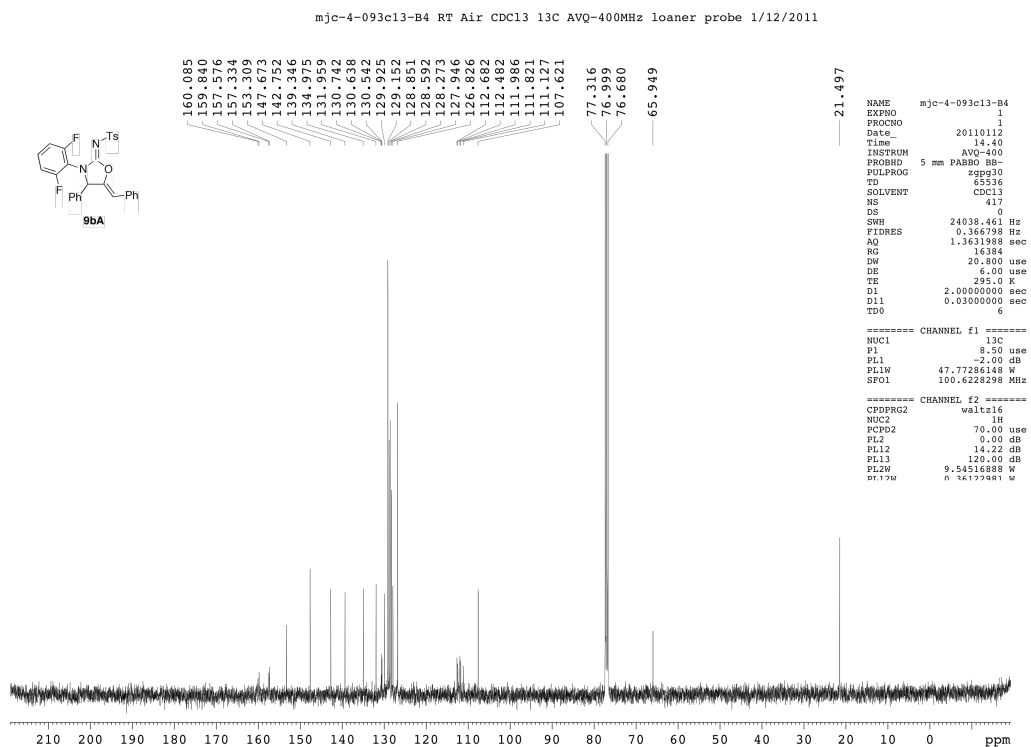

# $^1\text{H}$ NMR, $^{13}\text{C}$ NMR, $^{19}\text{F}$ NMR Spectra and HPLC Traces

mjc-4-093f19-B4 RT Air CDC13 19F AVQ-400MHz loaner probe 1/12/2011

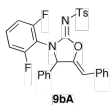

-112.495  
-112.513  
-112.532  
-116.504  
-116.523  
-116.544

```
NAME mjc-4-093f19-B4
EXPNO 1
PROCNO 1
Date_ 20110112
Time 17.17
INSTRUM AVQ-400
PROBHD 5 mm PABBO BE-
PULPROG zg30
TD 131072
SOLVENT CDCl3
NS 32
DS 0
SWH 90090.094 Hz
FIDRES 0.687333 Hz
AQ 0.7274996 sec
RG 1149.4
DN 5.550 use
DE 6.00 use
TE 294.7 K
D1 1.0000000 sec
TD0 1

===== CHANNEL f1 =====
NUC1 19F
P1 13.75 use
PL1 -3.00 dB
PLW 20.04748917 W
SFO1 376.4720111 MHz
SI 6556
SF 376.4980736 MHz
WDW EM
SSB 0
LB 2.00 Hz
GB 0
PC 4.00
```

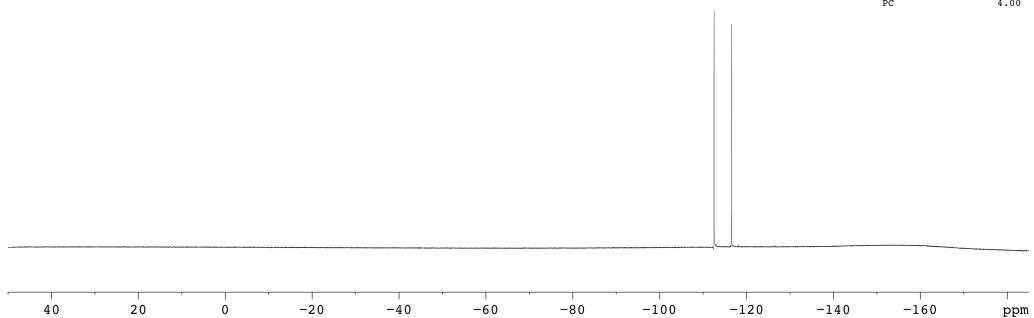

# <sup>1</sup>H NMR, <sup>13</sup>C NMR, <sup>19</sup>F NMR Spectra and HPLC Traces

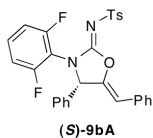

mjc-4-093-B  
C:\EZStart\Projects\Default\Data\Campbell\Published Traces\mjc-4-093-B  
IA7525IP\_30min.met9-22-2010 5-05-31 PM.dat

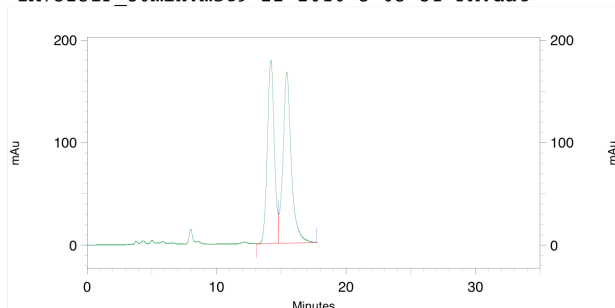

5: 288 nm, 4

nm Results

| Retention Time | Area    | Area Percent | Lambda Max |
|----------------|---------|--------------|------------|
| 14.200         | 6703587 | 47.415       | 207        |
| 15.424         | 7434597 | 52.585       | 207        |

mjc-4-095-B  
C:\EZStart\Projects\Default\Data\Campbell\Published Traces\mjc-4-095-B  
IA7525IP\_30min.met9-22-2010 5-24-57 PM.dat

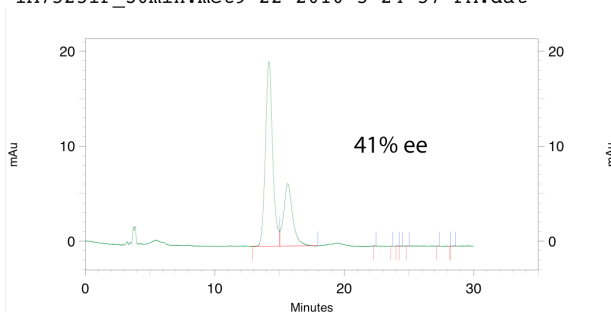

5: 288 nm, 4

nm Results

| Retention Time | Area   | Area Percent | Lambda Max |
|----------------|--------|--------------|------------|
| 14.192         | 758739 | 70.320       | 207        |
| 15.636         | 318448 | 29.514       | 207        |

# <sup>1</sup>H NMR, <sup>13</sup>C NMR, <sup>19</sup>F NMR Spectra and HPLC Traces

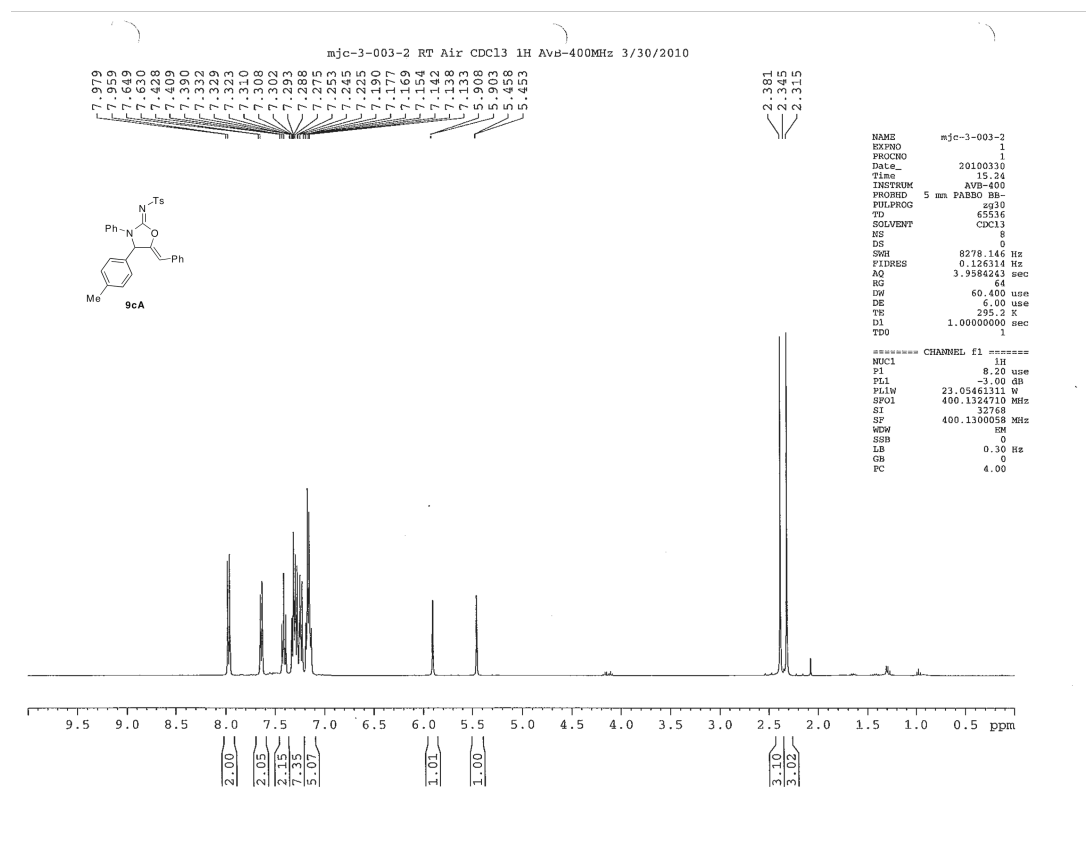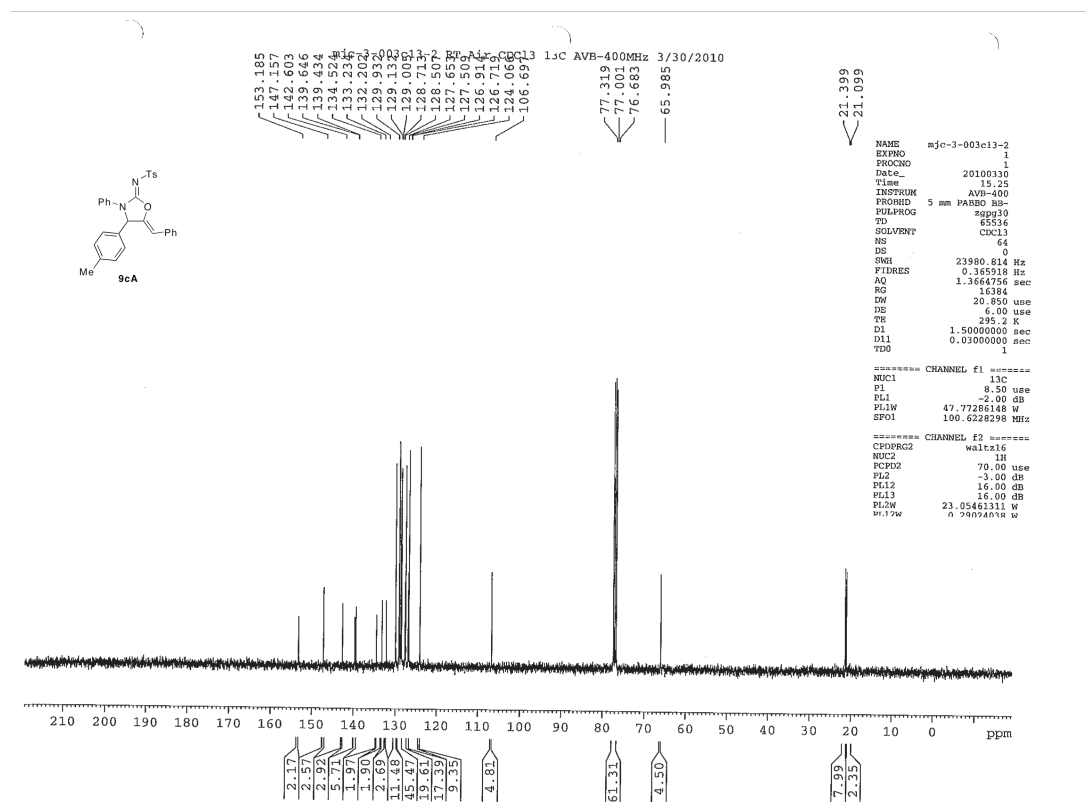

# <sup>1</sup>H NMR, <sup>13</sup>C NMR, <sup>19</sup>F NMR Spectra and HPLC Traces

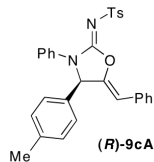

mjc-3-003  
C:\EZStart\Projects\Default\Data\Campbell\Published  
Traces\mjc-3-003-IA6535IP\_30min.met3-30-2010 4-48-06 PM.dat

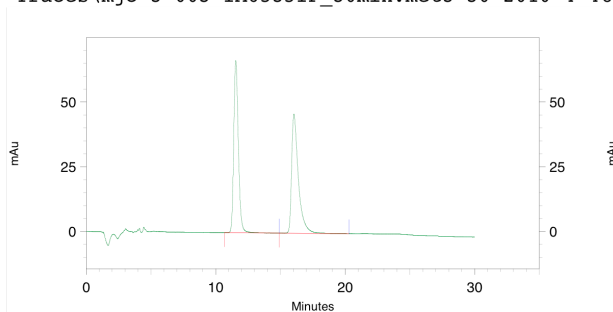

5: 287 nm, 4  
nm Results

| Retention Time | Area    | Area Percent | Lambda Max |
|----------------|---------|--------------|------------|
| 11.548         | 1652448 | 49.794       | 206        |
| 16.044         | 1666134 | 50.206       | 206        |

mjc-4-165-B  
C:\EZStart\Projects\Default\Data\Campbell\Published Traces\mjc-4-165-B  
IA6535IP\_30min.met1-22-2011 6-43-46 PM.dat

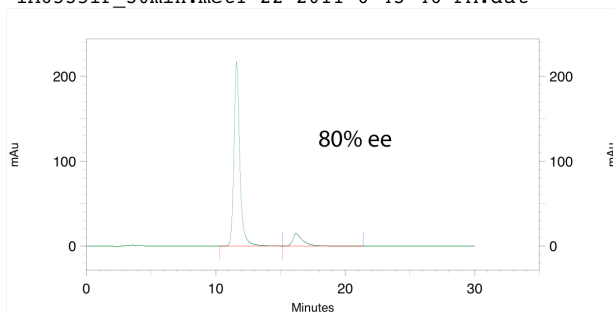

5: 288 nm, 4  
nm Results

| Retention Time | Area    | Area Percent | Lambda Max |
|----------------|---------|--------------|------------|
| 11.616         | 6842736 | 89.759       | 208        |
| 16.212         | 780679  | 10.241       | 207        |

# <sup>1</sup>H NMR, <sup>13</sup>C NMR, <sup>19</sup>F NMR Spectra and HPLC Traces

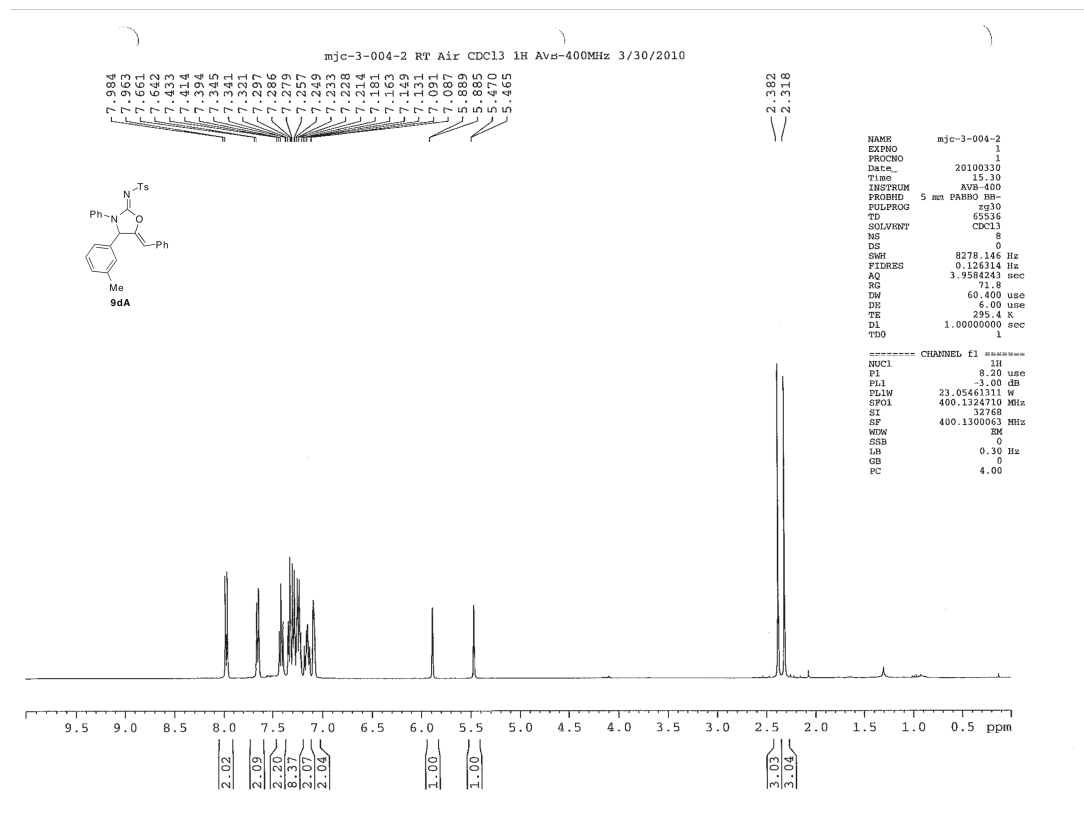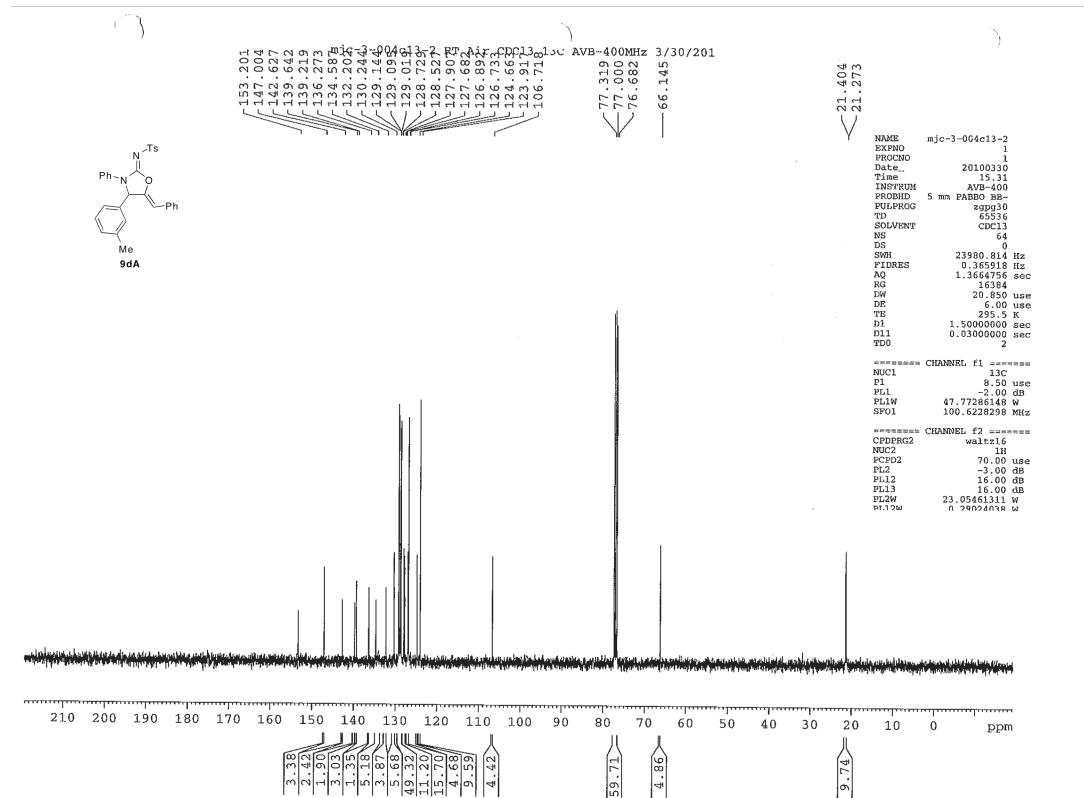

# <sup>1</sup>H NMR, <sup>13</sup>C NMR, <sup>19</sup>F NMR Spectra and HPLC Traces

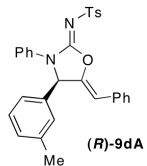

mjc-3-004  
C:\EZStart\Projects\Default\Data\Campbell\Published  
Traces\mjc-3-004-IA6535IP\_30min.met3-30-2010 5-20-25 PM.dat

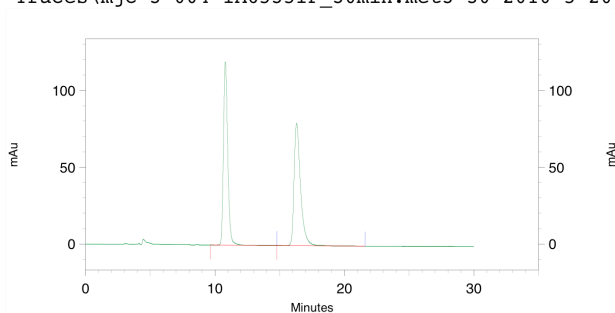

5: 287 nm, 4  
nm Results

| Retention Time | Area    | Area Percent | Lambda Max |
|----------------|---------|--------------|------------|
| 10.800         | 2725525 | 49.834       | 190        |
| 16.308         | 2743712 | 50.166       | 206        |

mjc-4-165-C  
C:\EZStart\Projects\Default\Data\Campbell\Published Traces\mjc-4-165-C  
IA6535IP\_30min.met1-24-2011 8-17-17 PM.dat

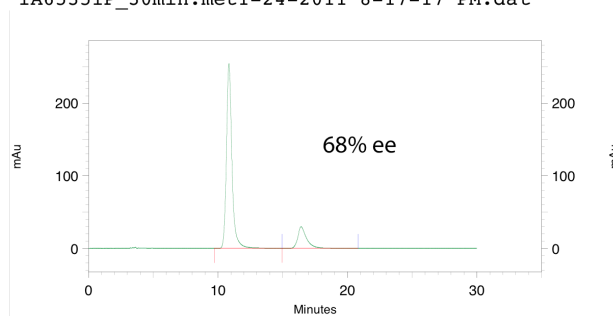

5: 288 nm, 4  
nm Results

| Retention Time | Area    | Area Percent | Lambda Max |
|----------------|---------|--------------|------------|
| 10.844         | 7550646 | 84.117       | 208        |
| 16.420         | 1425695 | 15.883       | 207        |



# <sup>1</sup>H NMR, <sup>13</sup>C NMR, <sup>19</sup>F NMR Spectra and HPLC Traces

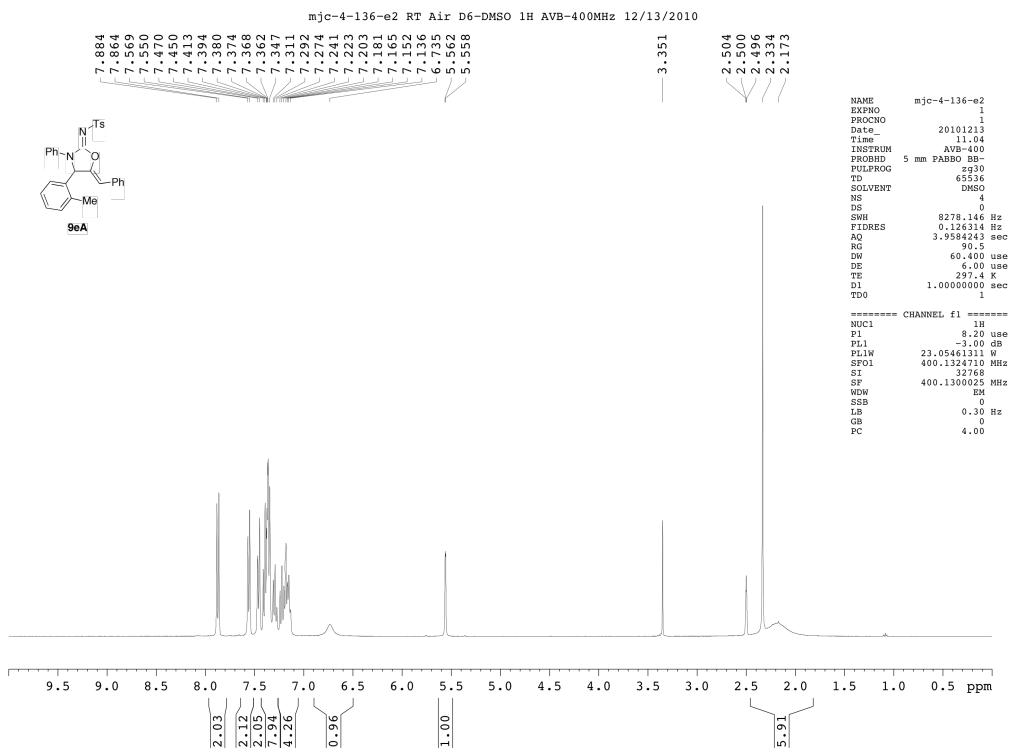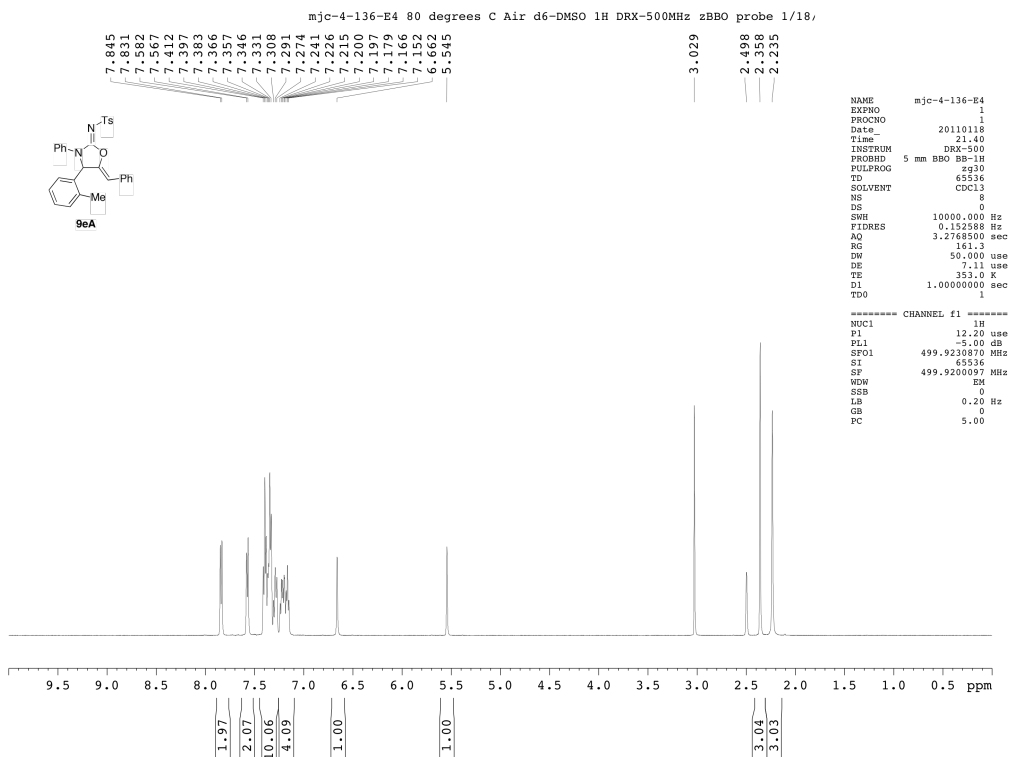

# <sup>1</sup>H NMR, <sup>13</sup>C NMR, <sup>19</sup>F NMR Spectra and HPLC Traces

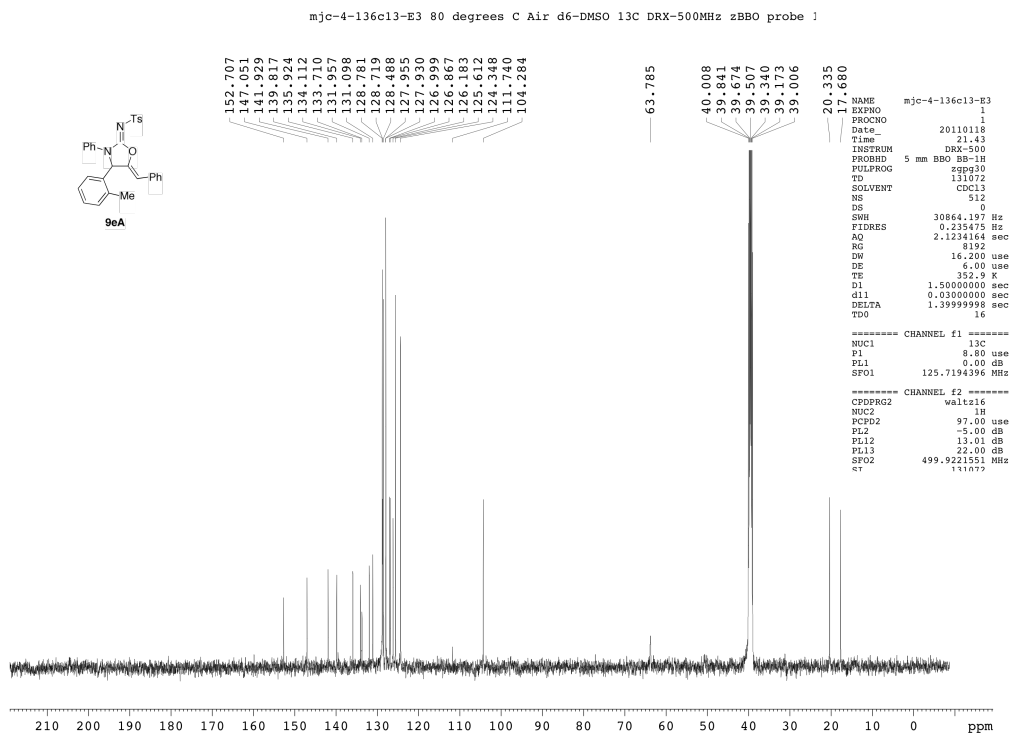

# <sup>1</sup>H NMR, <sup>13</sup>C NMR, <sup>19</sup>F NMR Spectra and HPLC Traces

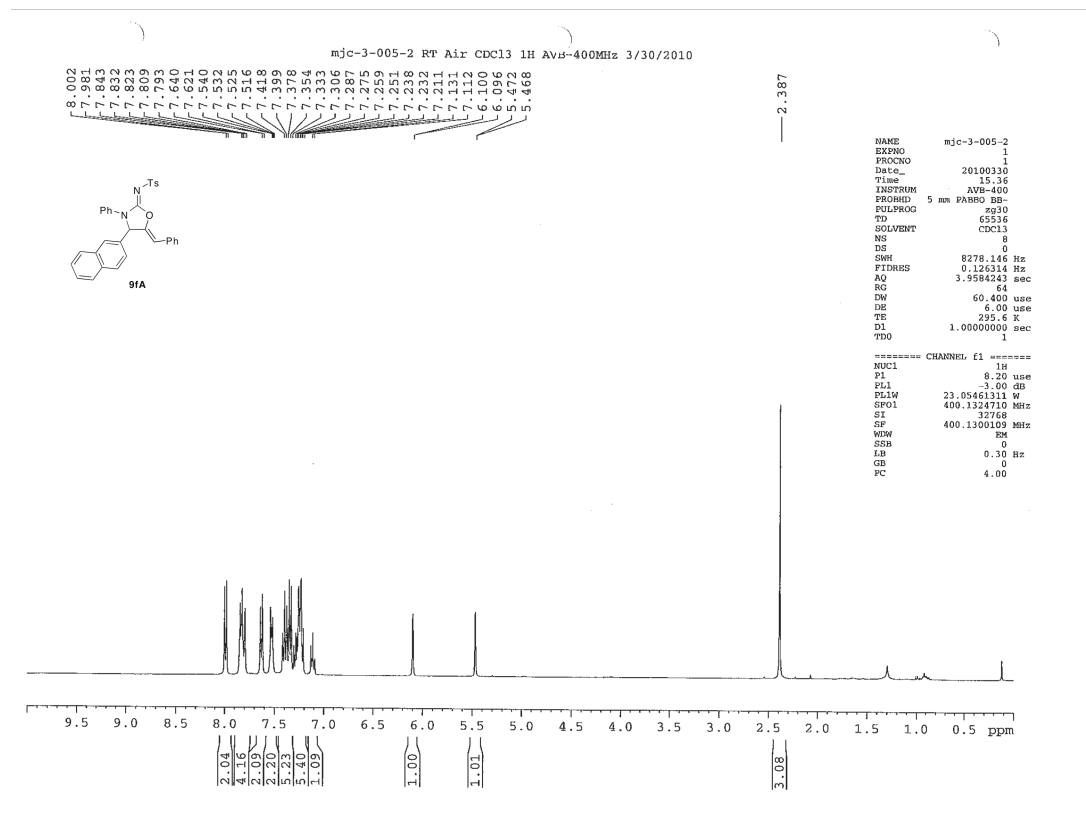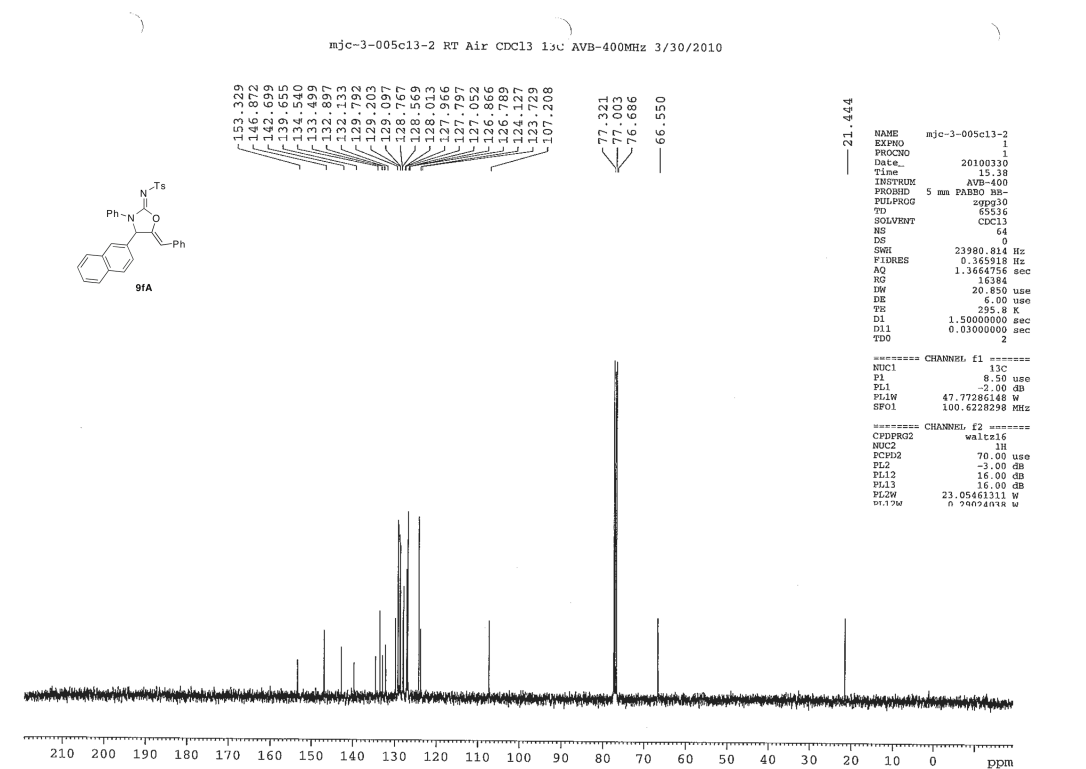

# $^1\text{H}$ NMR, $^{13}\text{C}$ NMR, $^{19}\text{F}$ NMR Spectra and HPLC Traces

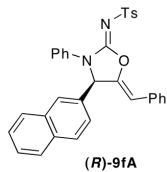

mjc-3-005  
C:\EZStart\Projects\Default\Data\Campbell\Published  
Traces\mjc-3-005-IA6535IP\_30min.met3-30-2010 5-52-46 PM.dat

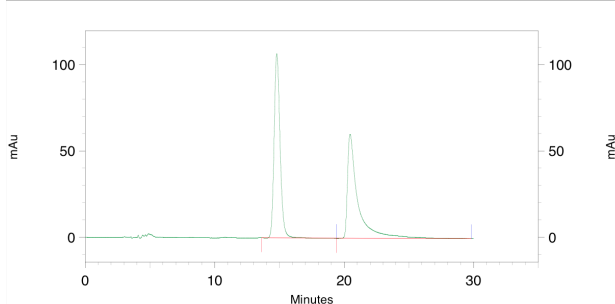

5: 287 nm, 4  
nm Results

| Retention Time | Area    | Area Percent | Lambda Max |
|----------------|---------|--------------|------------|
| 14.796         | 3364311 | 50.137       | 224        |
| 20.464         | 3345987 | 49.863       | 224        |

mjc-4-165-E  
C:\EZStart\Projects\Default\Data\Campbell\Published Traces\mjc-4-165-E  
IA6535IP\_30min.met1-22-2011 7-15-32 PM.dat

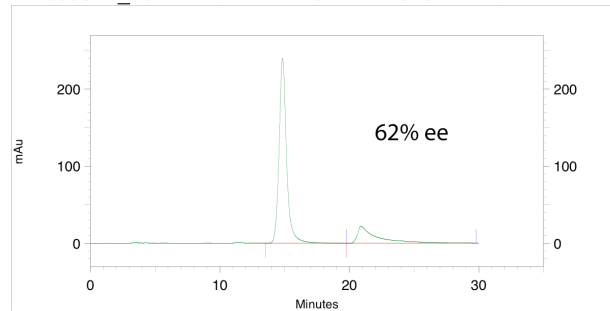

5: 288 nm, 4  
nm Results

| Retention Time | Area    | Area Percent | Lambda Max |
|----------------|---------|--------------|------------|
| 14.840         | 9610549 | 81.006       | 224        |
| 20.900         | 2253515 | 18.994       | 225        |



# <sup>1</sup>H NMR, <sup>13</sup>C NMR, <sup>19</sup>F NMR Spectra and HPLC Traces

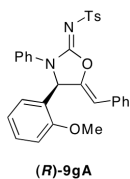

mjc-4-145-P  
C:\EZStart\Projects\Default\Data\Campbell\Published Traces\mjc-4-145-P  
IA6535IP\_30min.met1-18-2011 3-53-41 AM.dat

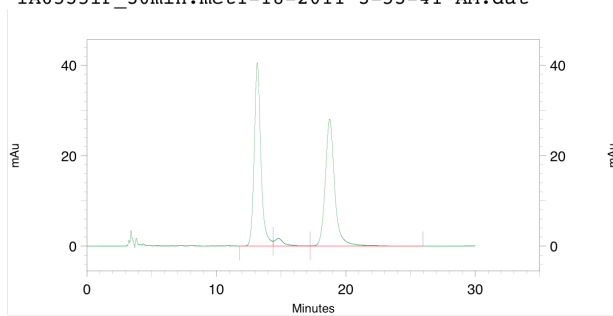

5: 287 nm, 4

nm Results

| Retention Time | Area    | Area Percent | Lambda Max |
|----------------|---------|--------------|------------|
| 13.172         | 1454293 | 49.275       | 207        |
| 14.792         | 82619   | 2.799        | 207        |
| 18.760         | 1414487 | 47.926       | 207        |

mjc-4-153-L  
C:\EZStart\Projects\Default\Data\Campbell\Published Traces\mjc-4-153-L  
IA6535IP\_30min.met1-18-2011 2-18-06 AM.dat

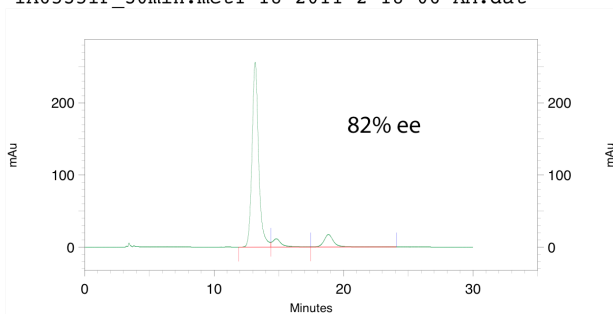

5: 287 nm, 4

nm Results

| Retention Time | Area    | Area Percent | Lambda Max |
|----------------|---------|--------------|------------|
| 13.176         | 9111308 | 86.499       | 208        |
| 14.816         | 543191  | 5.157        | 207        |
| 18.840         | 878969  | 8.345        | 207        |

# <sup>1</sup>H NMR, <sup>13</sup>C NMR, <sup>19</sup>F NMR Spectra and HPLC Traces

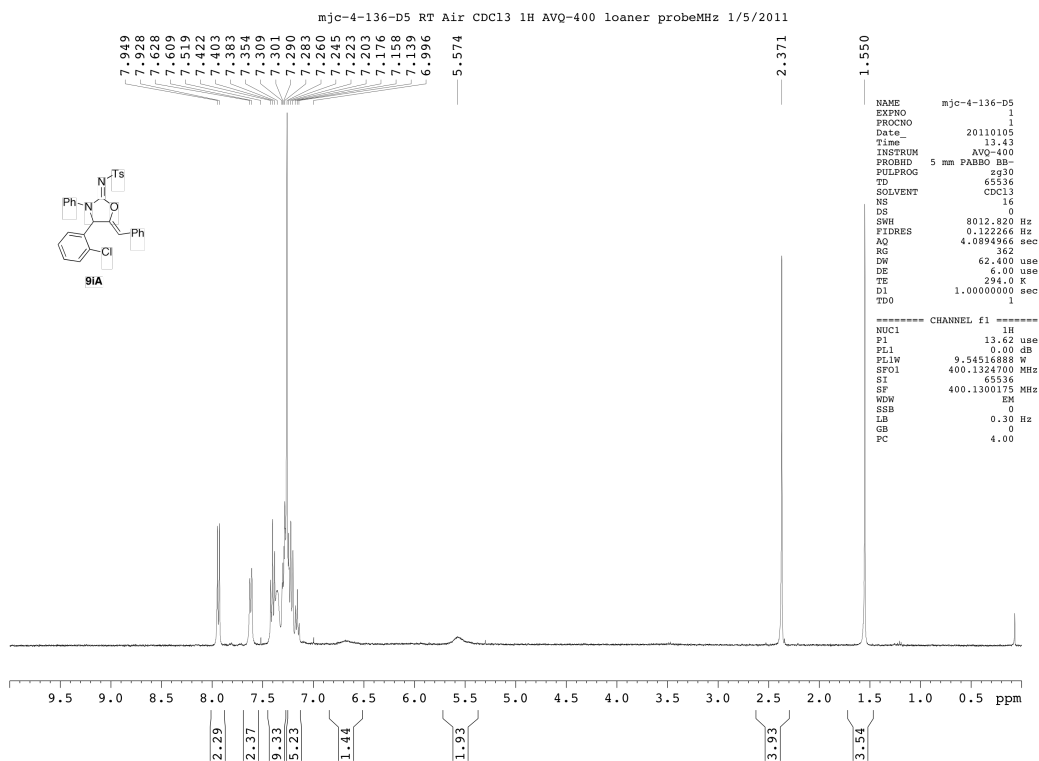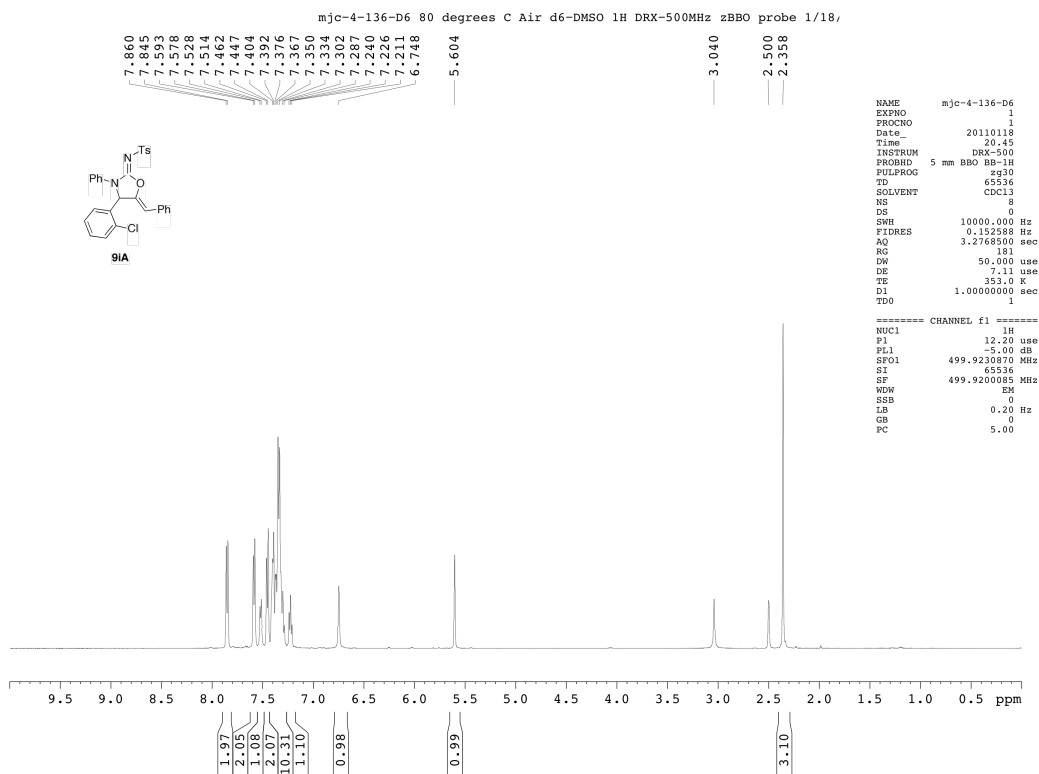

# <sup>1</sup>H NMR, <sup>13</sup>C NMR, <sup>19</sup>F NMR Spectra and HPLC Traces

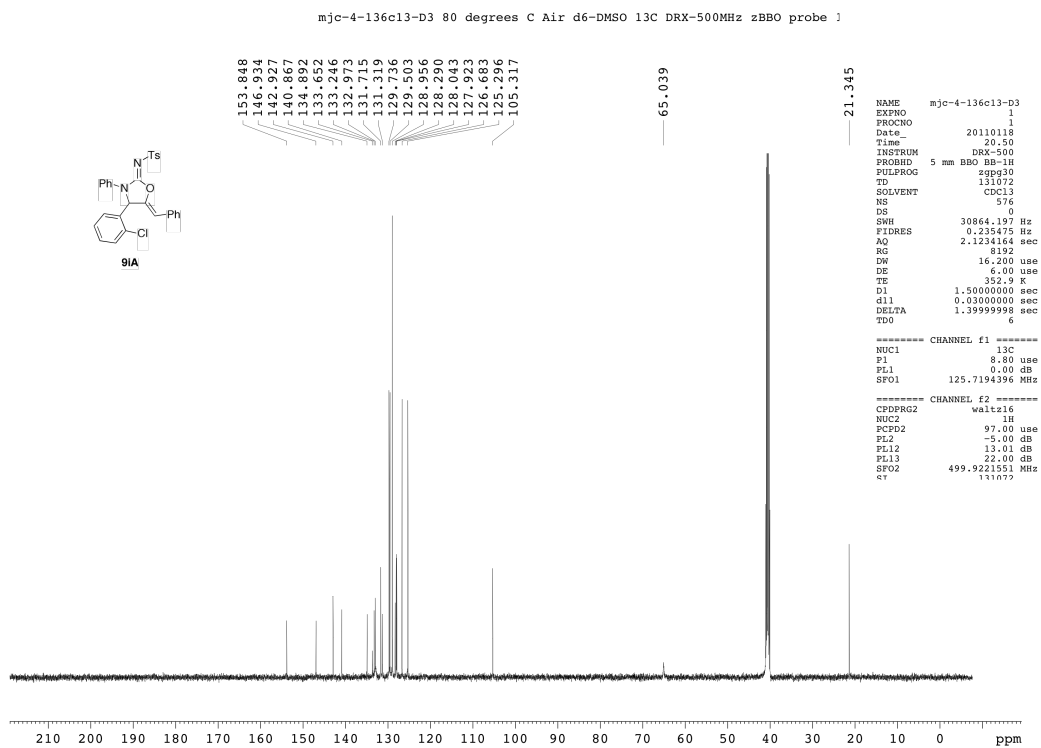



# <sup>1</sup>H NMR, <sup>13</sup>C NMR, <sup>19</sup>F NMR Spectra and HPLC Traces

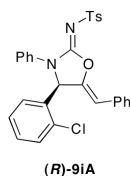

mjc-4-136-D  
C:\EZStart\Projects\Default\Data\Campbell\Published Traces\mjc-4-136-D  
IA6535IP\_60min.met12-16-2010 11-44-38 AM.dat

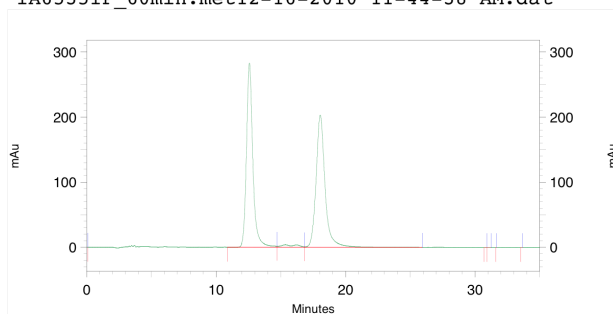

5: 287 nm, 4

nm Results

| Retention Time | Area    | Area Percent | Lambda Max |
|----------------|---------|--------------|------------|
| 12.572         | 9674223 | 48.933       | 208        |
| 15.348         | 320507  | 1.621        | 207        |
| 18.044         | 9773924 | 49.437       | 208        |

mjc-4-165-N

C:\EZStart\Projects\Default\Data\Campbell\Published Traces\mjc-4-165-N  
IA6535IP\_30min.met1-22-2011 7-47-18 PM.dat

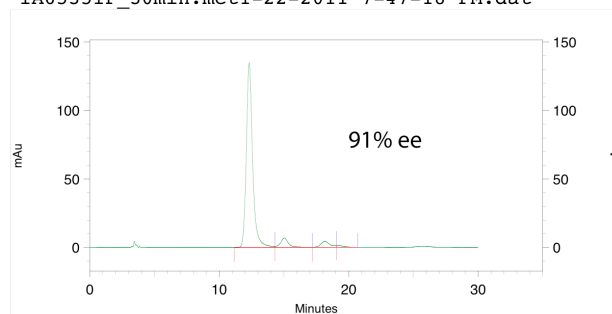

5: 287 nm, 4

nm Results

| Retention Time | Area    | Area Percent | Lambda Max |
|----------------|---------|--------------|------------|
| 12.316         | 4533602 | 88.885       | 208        |
| 15.028         | 296778  | 5.819        | 207        |
| 18.164         | 221088  | 4.335        | 207        |
| 19.148         | 49036   | 0.961        | 208        |

# <sup>1</sup>H NMR, <sup>13</sup>C NMR, <sup>19</sup>F NMR Spectra and HPLC Traces

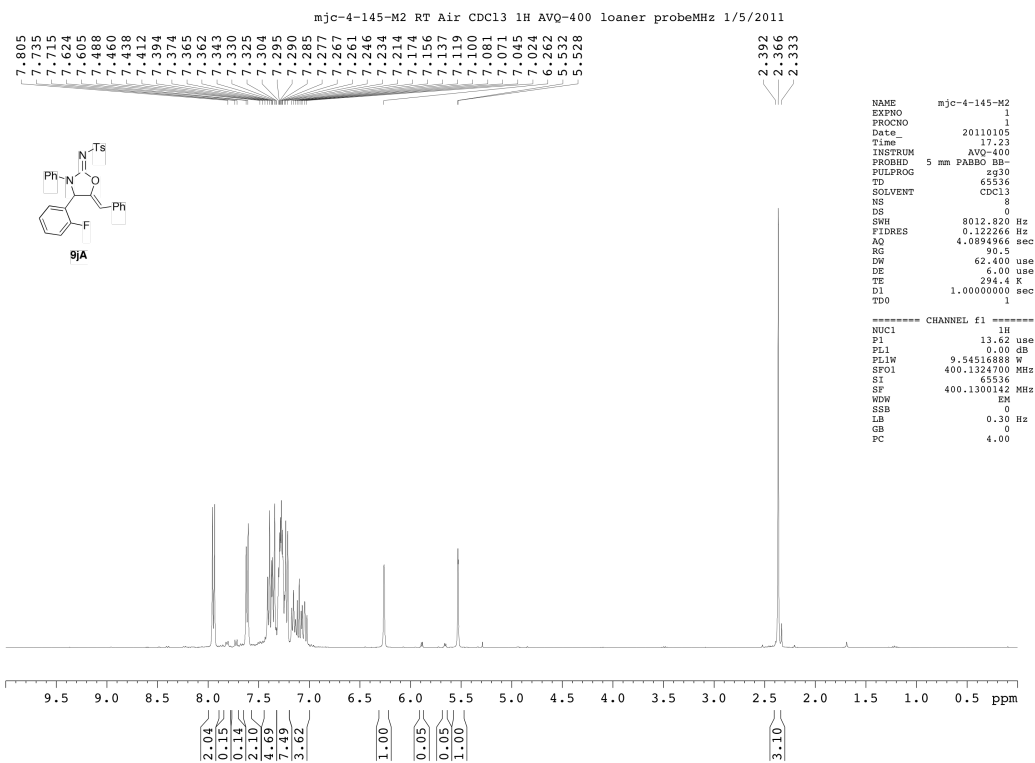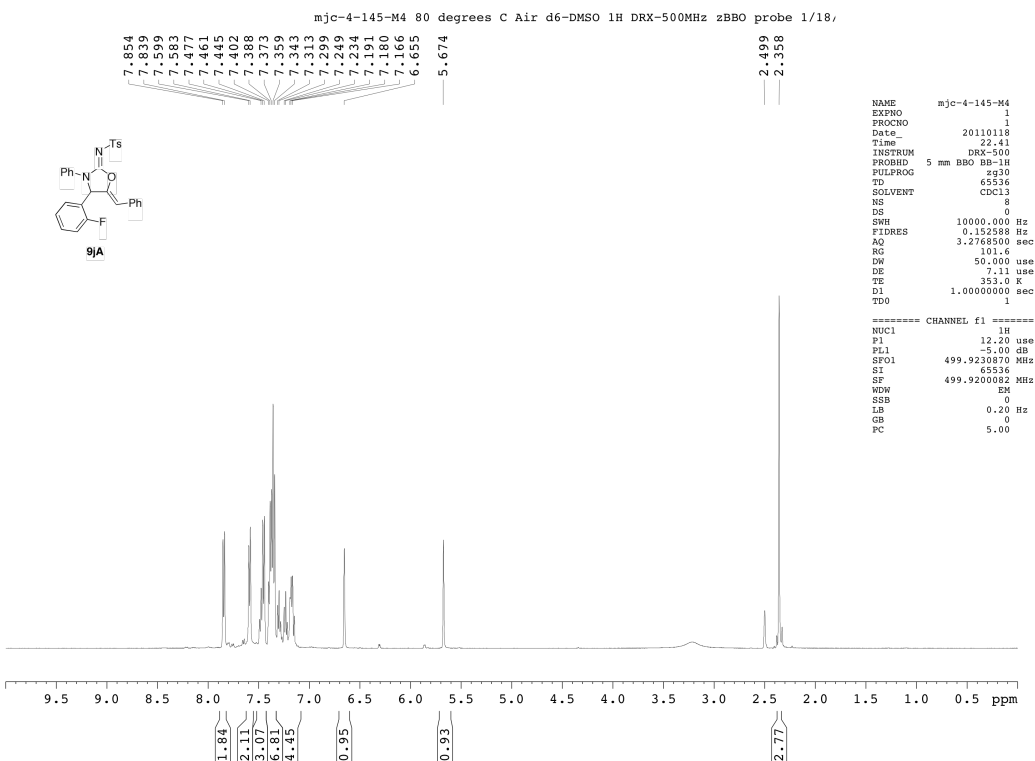

# <sup>1</sup>H NMR, <sup>13</sup>C NMR, <sup>19</sup>F NMR Spectra and HPLC Traces

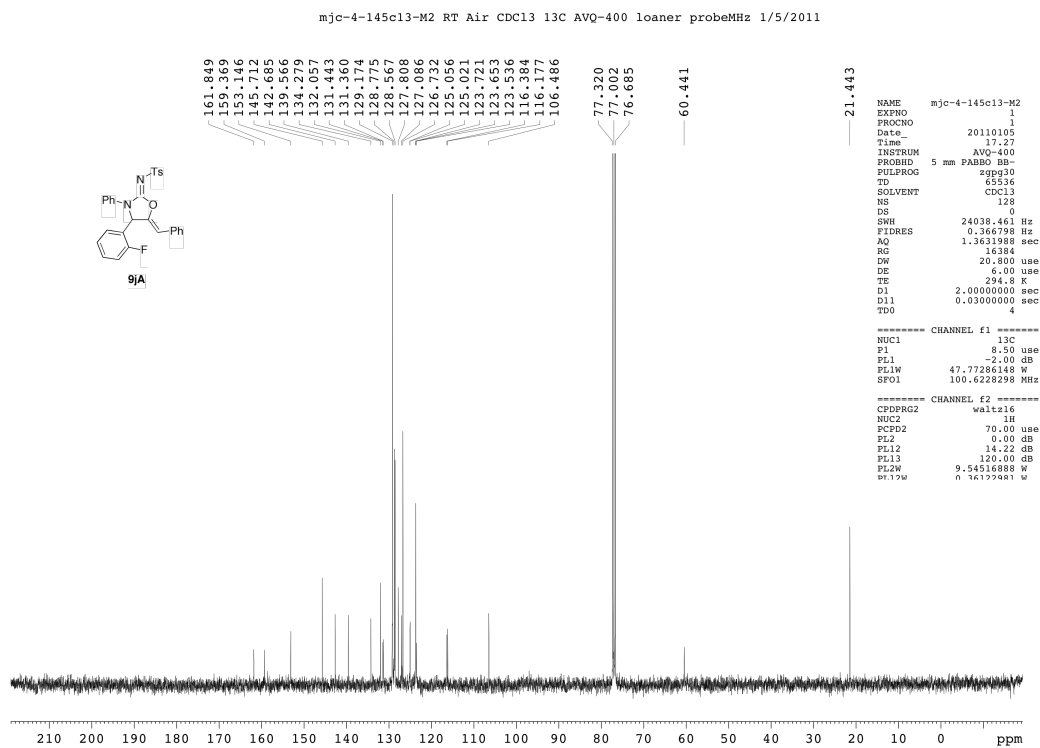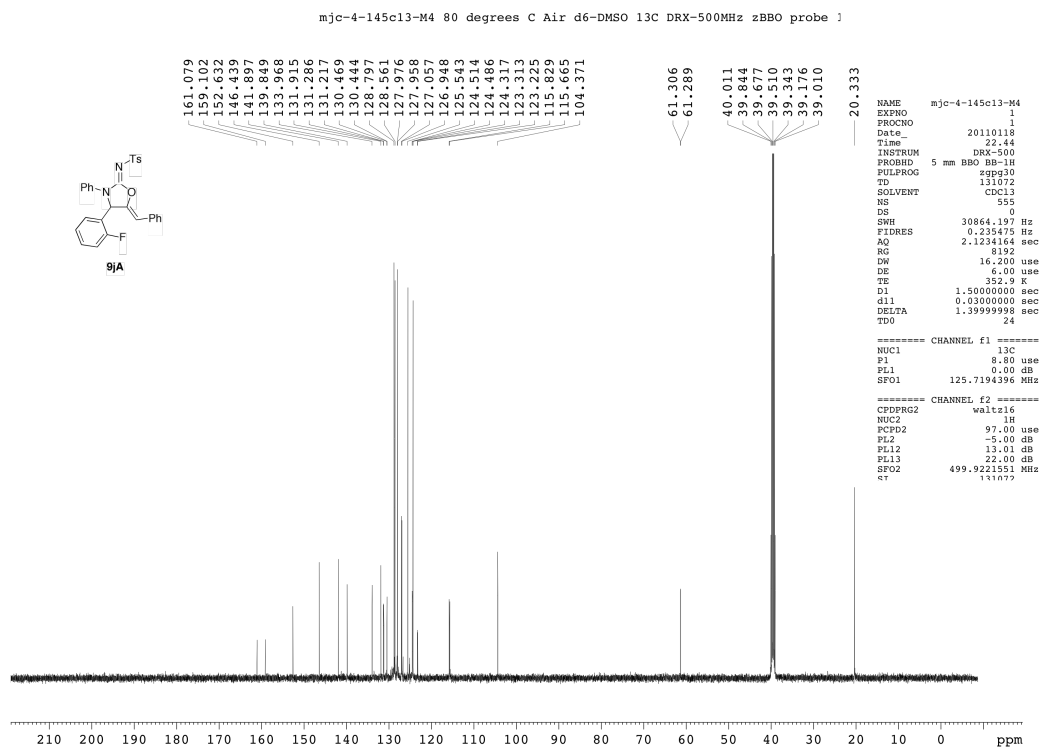

# <sup>1</sup>H NMR, <sup>13</sup>C NMR, <sup>19</sup>F NMR Spectra and HPLC Traces

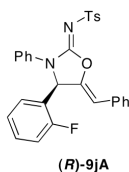

mjc-4-145-M  
C:\EZStart\Projects\Default\Data\Campbell\Published Traces\mjc-4-145-M  
IA6535IP\_30min.met1-18-2011 3-21-50 AM.dat

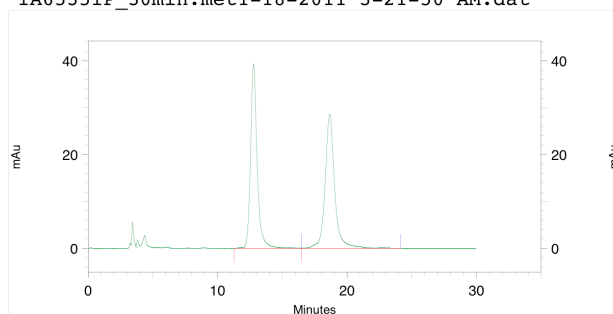

5: 287 nm, 4  
nm Results

| Retention Time | Area    | Area Percent | Lambda Max |
|----------------|---------|--------------|------------|
| 12.780         | 1393922 | 48.631       | 207        |
| 18.668         | 1472384 | 51.369       | 207        |

mjc-4-165-K  
C:\EZStart\Projects\Default\Data\Campbell\Published Traces\mjc-4-165-K  
IA6535IP\_30min.met1-24-2011 9-52-34 PM.dat

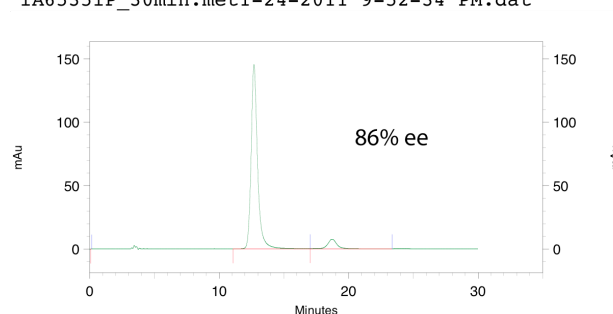

5: 287 nm, 4  
nm Results

| Retention Time | Area    | Area Percent | Lambda Max |
|----------------|---------|--------------|------------|
| 12.692         | 5026312 | 92.886       | 208        |
| 18.732         | 384882  | 7.113        | 207        |

**$^1\text{H}$  NMR,  $^{13}\text{C}$  NMR,  $^{19}\text{F}$  NMR Spectra and HPLC Traces**

# <sup>1</sup>H NMR, <sup>13</sup>C NMR, <sup>19</sup>F NMR Spectra and HPLC Traces

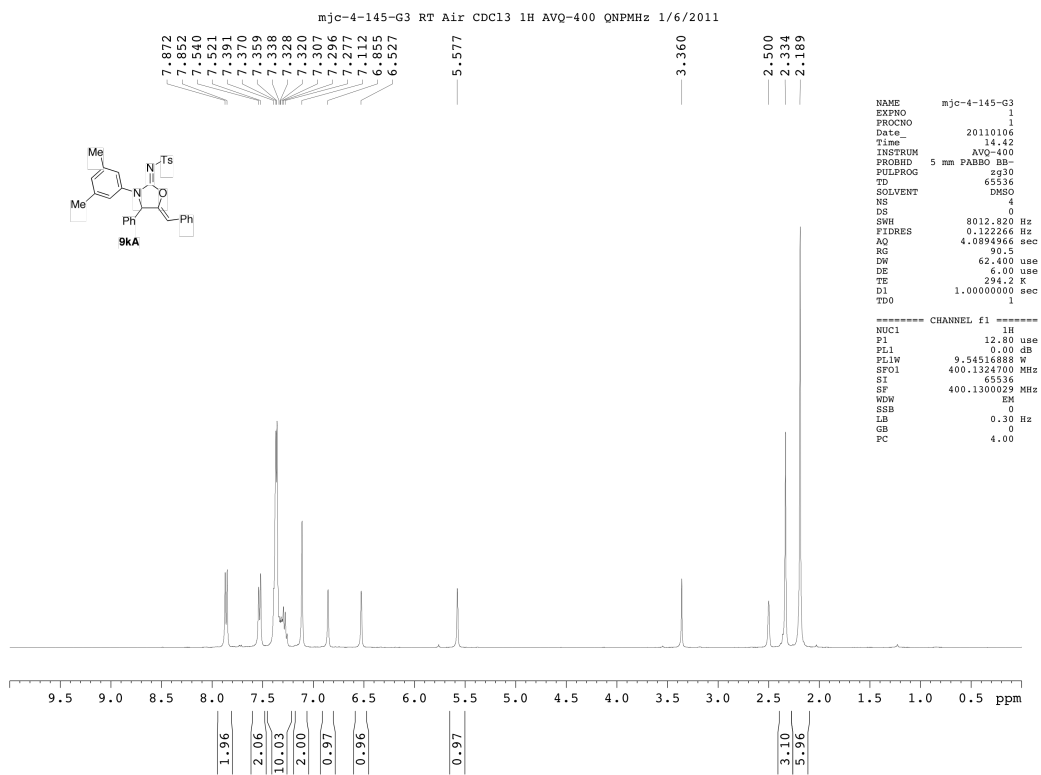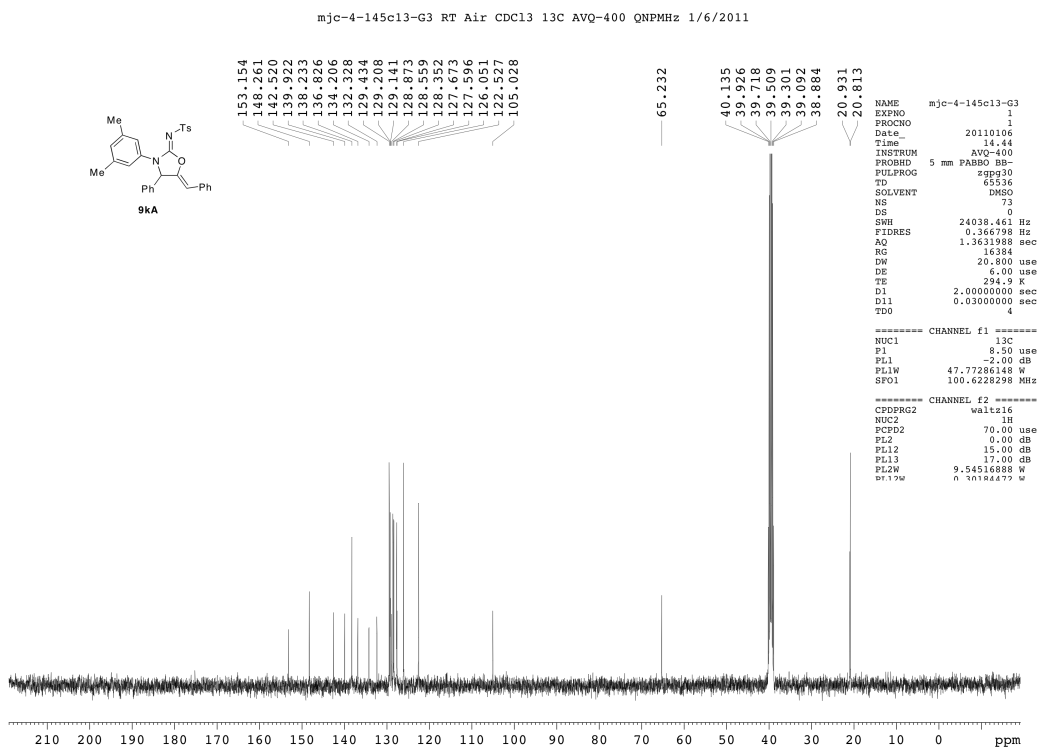

# <sup>1</sup>H NMR, <sup>13</sup>C NMR, <sup>19</sup>F NMR Spectra and HPLC Traces

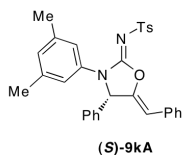

mjc-4-052-G  
C:\EZStart\Projects\Default\Data\Campbell\Published Traces\mjc-4-052-G  
IA6535IP\_60min.met9-7-2010 9-05-06 AM.dat

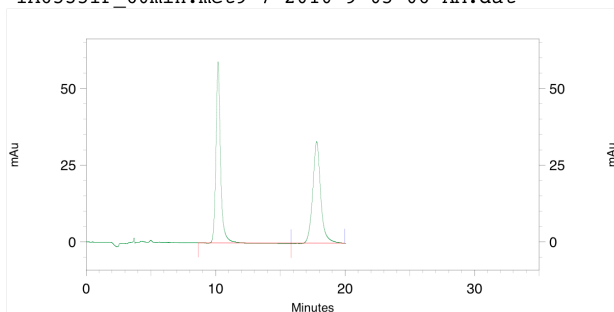

5: 288 nm, 4

nm Results

| Retention Time | Area    | Area Percent | Lambda Max |
|----------------|---------|--------------|------------|
| 10.192         | 1432592 | 50.416       | 208        |
| 17.808         | 1408938 | 49.584       | 208        |

mjc-4-072-A  
C:\EZStart\Projects\Default\Data\Campbell\Published Traces\mjc-4-072-A  
IA6535IP\_30min.met9-7-2010 5-26-52 PM.dat

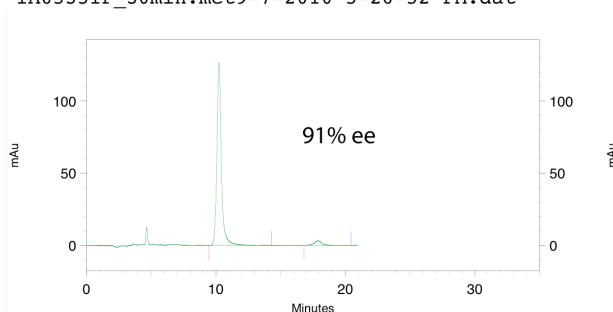

5: 288 nm, 4

nm Results

| Retention Time | Area    | Area Percent | Lambda Max |
|----------------|---------|--------------|------------|
| 10.248         | 3034892 | 95.626       | 208        |
| 17.912         | 138831  | 4.374        | 208        |

# <sup>1</sup>H NMR, <sup>13</sup>C NMR, <sup>19</sup>F NMR Spectra and HPLC Traces

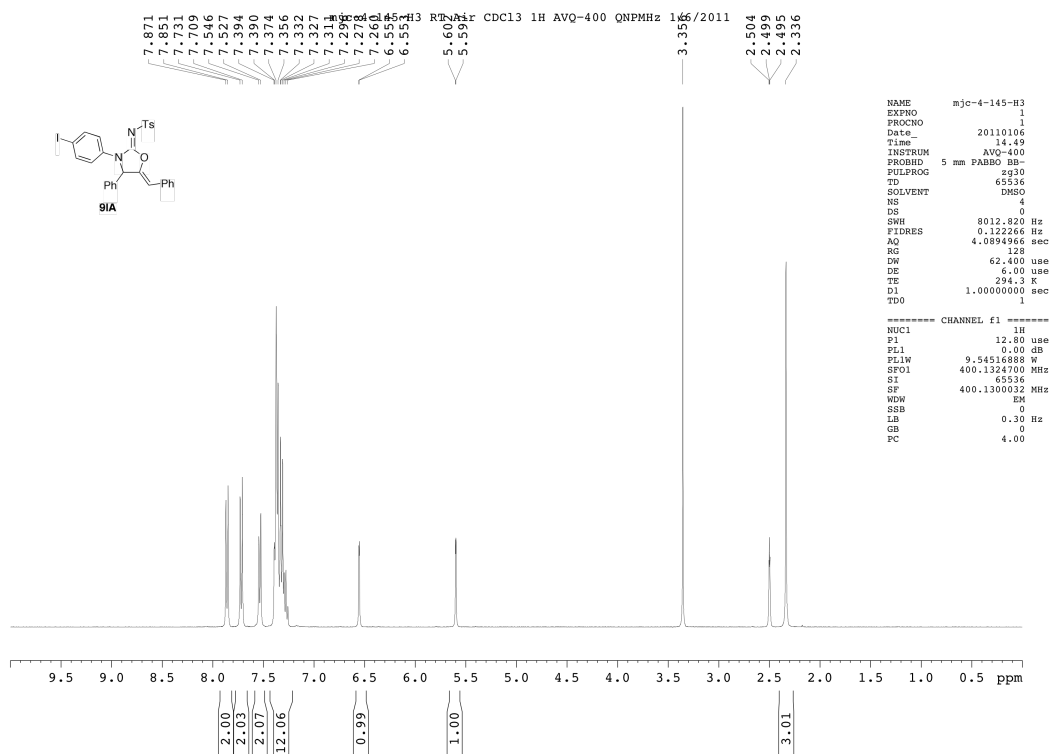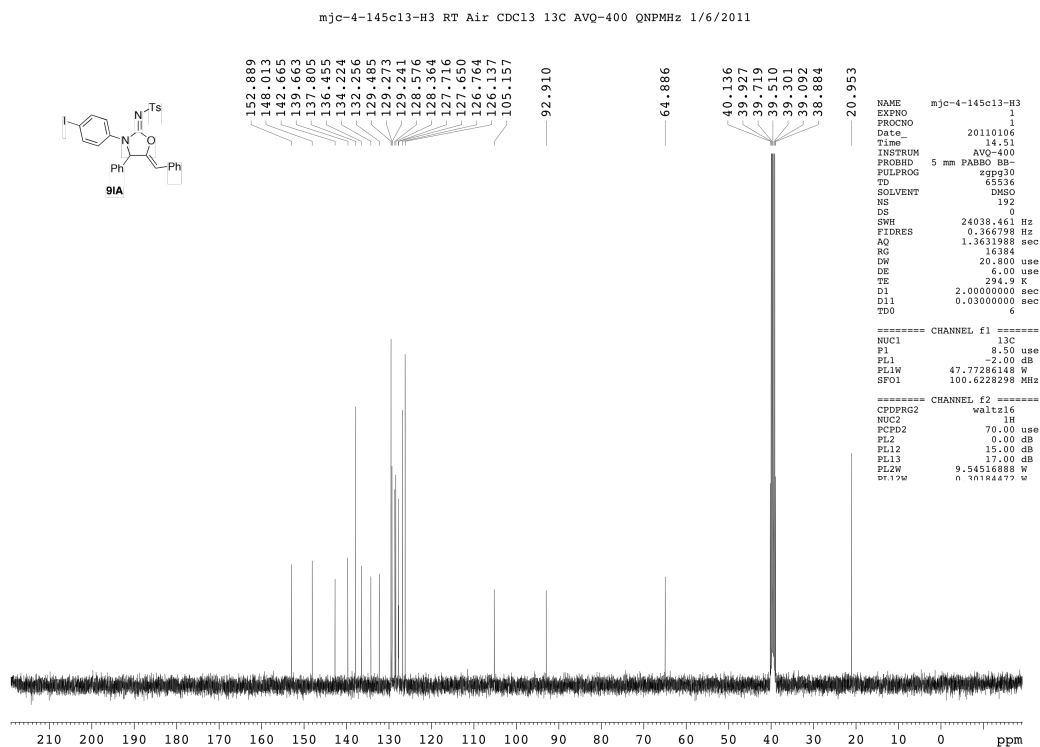



# $^1\text{H}$ NMR, $^{13}\text{C}$ NMR, $^{19}\text{F}$ NMR Spectra and HPLC Traces

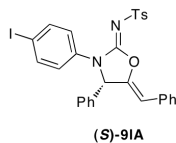

mjc-4-052-H  
C:\EZStart\Projects\Default\Data\Campbell\Published Traces\mjc-4-052-H  
IA6535IP\_60min.met9-7-2010 9-26-48 AM.dat

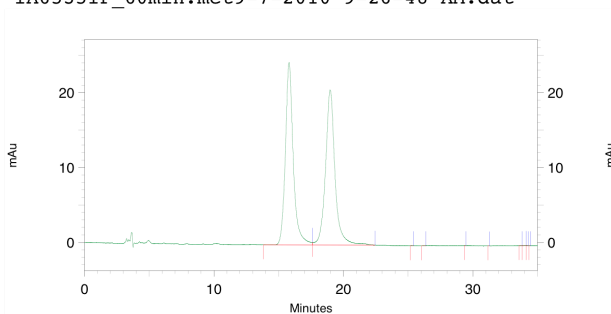

5: 288 nm, 4  
nm Results

| Retention Time | Area    | Area Percent | Lambda Max |
|----------------|---------|--------------|------------|
| 15.808         | 1033181 | 49.394       | 208        |
| 18.976         | 1055905 | 50.481       | 208        |

mjc-4-072-B  
C:\EZStart\Projects\Default\Data\Campbell\Published Traces\mjc-4-072-B  
IA6535IP\_30min.met9-7-2010 5-49-28 PM.dat

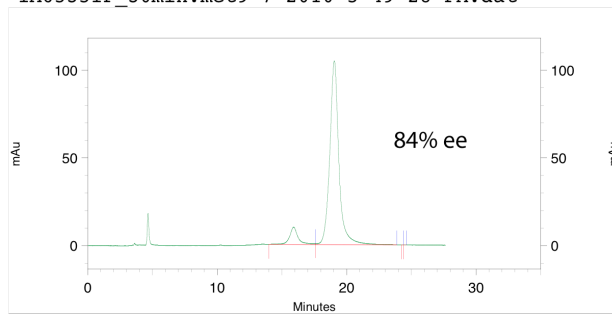

5: 288 nm, 4  
nm Results

| Retention Time | Area    | Area Percent | Lambda Max |
|----------------|---------|--------------|------------|
| 15.904         | 445291  | 8.022        | 208        |
| 19.044         | 5105122 | 91.972       | 208        |

# <sup>1</sup>H NMR, <sup>13</sup>C NMR, <sup>19</sup>F NMR Spectra and HPLC Traces

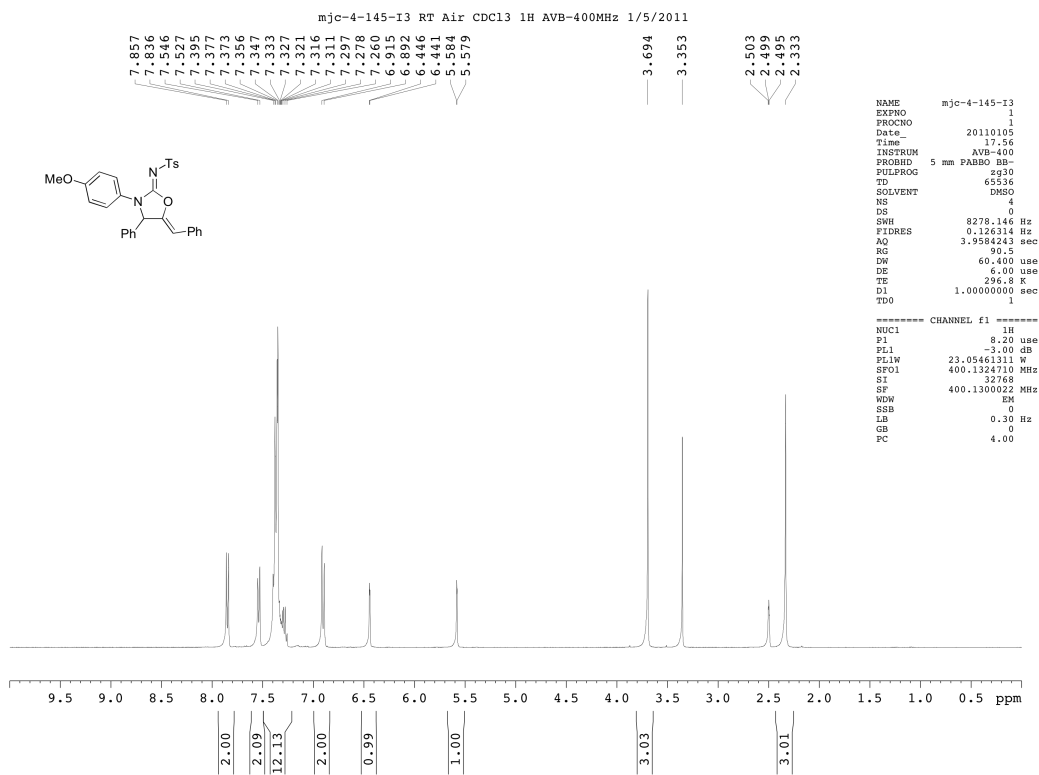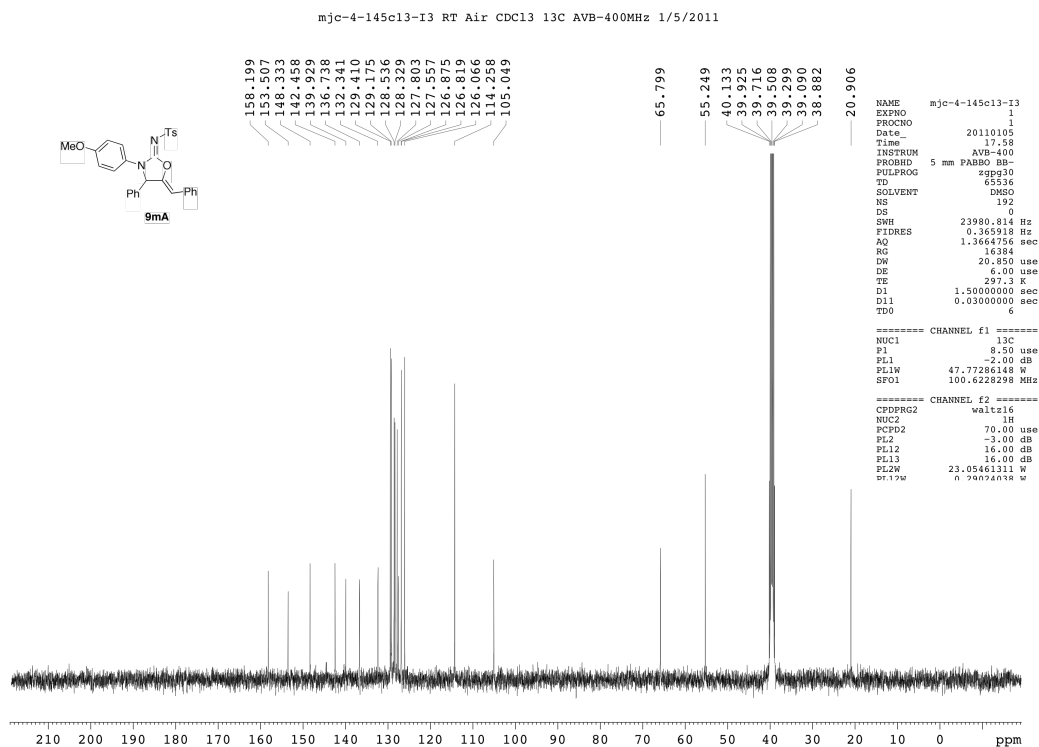

# $^1\text{H}$ NMR, $^{13}\text{C}$ NMR, $^{19}\text{F}$ NMR Spectra and HPLC Traces

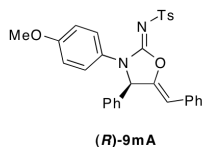

mjc-4-052-I  
C:\EZStart\Projects\Default\Data\Campbell\Published Traces\mjc-4-052-I  
IA6535IP\_60min.met9-7-2010 10-06-06 AM.dat

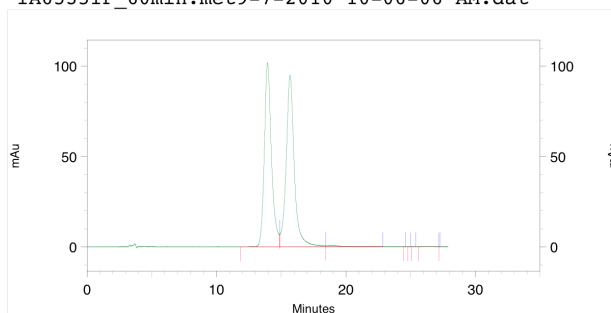

5: 288 nm, 4

nm Results

| Retention Time | Area    | Area Percent | Lambda Max |
|----------------|---------|--------------|------------|
| 13.940         | 3900587 | 48.043       | 208        |
| 15.684         | 4160274 | 51.241       | 208        |

mjc-4-165-H

C:\EZStart\Projects\Default\Data\Campbell\Published Traces\mjc-4-165-H  
IA6535IP\_30min.met1-24-2011 9-20-47 PM.dat

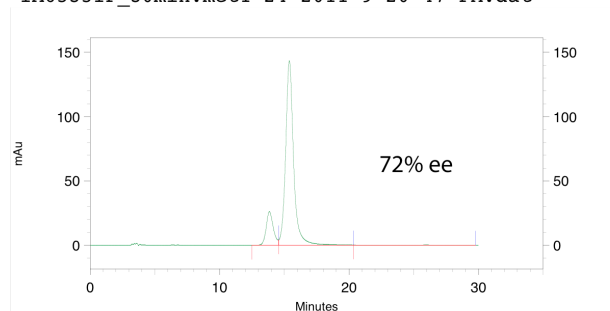

5: 288 nm, 4

nm Results

| Retention Time | Area    | Area Percent | Lambda Max |
|----------------|---------|--------------|------------|
| 13.856         | 986000  | 13.854       | 207        |
| 15.392         | 6108121 | 85.823       | 208        |

# <sup>1</sup>H NMR, <sup>13</sup>C NMR, <sup>19</sup>F NMR Spectra and HPLC Traces

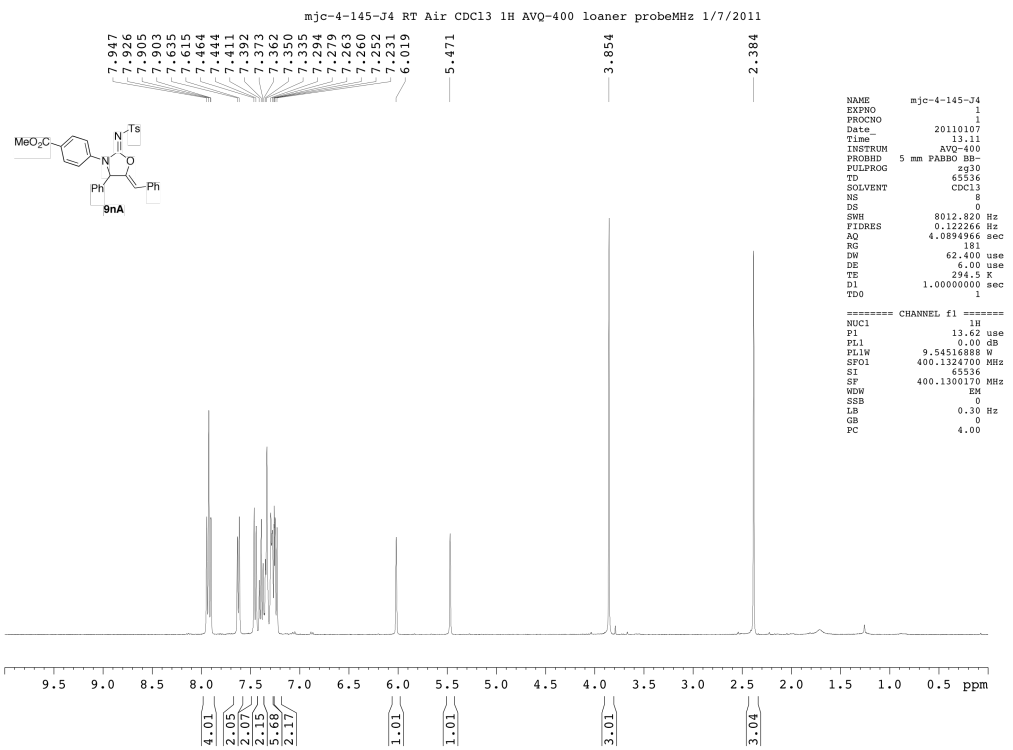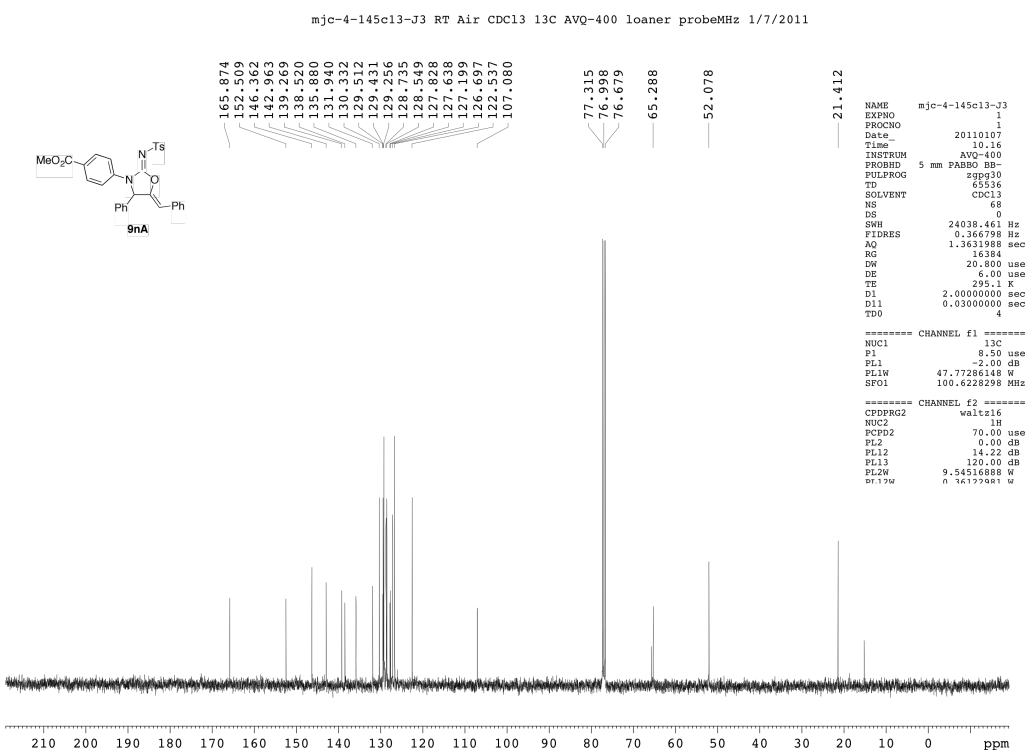

# <sup>1</sup>H NMR, <sup>13</sup>C NMR, <sup>19</sup>F NMR Spectra and HPLC Traces

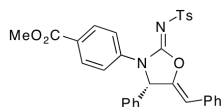

(S)-9nA

mjc-4-052-J  
C:\EZStart\Projects\Default\Data\Campbell\Published Traces\mjc-4-052-J  
IB6535IP\_30min.met9-8-2010 1-58-12 AM.dat

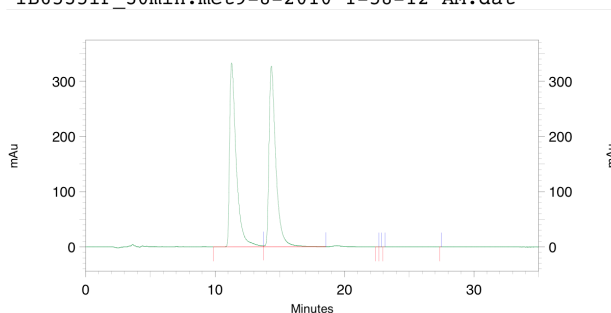

5: 288 nm, 4  
nm Results

| Retention Time | Area     | Area Percent | Lambda Max |
|----------------|----------|--------------|------------|
| 11.280         | 11925625 | 49.908       | 208        |
| 14.352         | 11968427 | 50.087       | 208        |

mjc-4-072-D  
C:\EZStart\Projects\Default\Data\Campbell\Published Traces\mjc-4-072-D  
IB6535IP\_60min.met9-8-2010 3-00-03 AM.dat

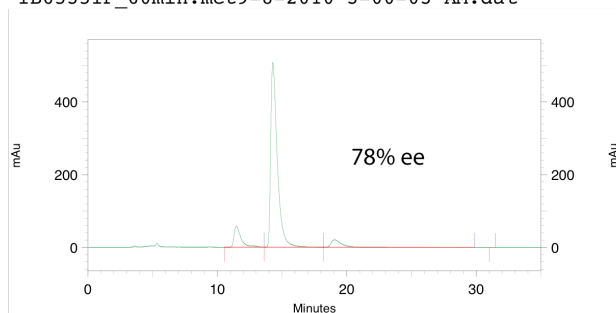

5: 288 nm, 4  
nm Results

| Retention Time | Area     | Area Percent | Lambda Max |
|----------------|----------|--------------|------------|
| 11.472         | 2225145  | 10.312       | 208        |
| 14.292         | 18159258 | 84.156       | 208        |
| 19.044         | 1191221  | 5.521        | 207        |

# <sup>1</sup>H NMR, <sup>13</sup>C NMR, <sup>19</sup>F NMR Spectra and HPLC Traces

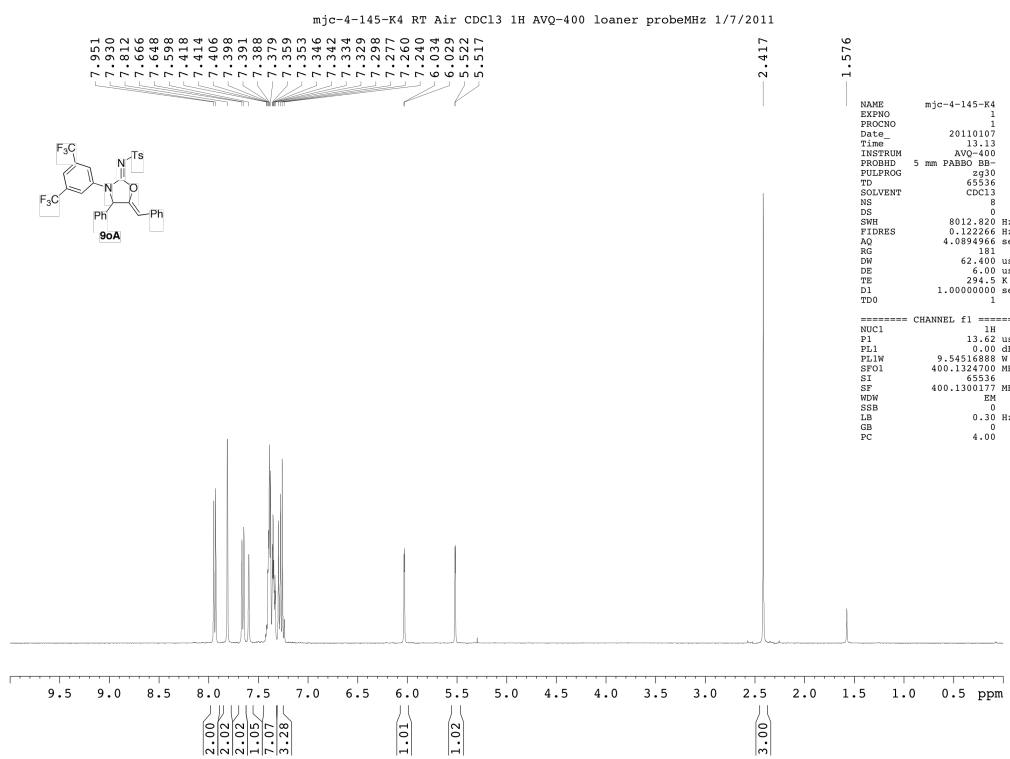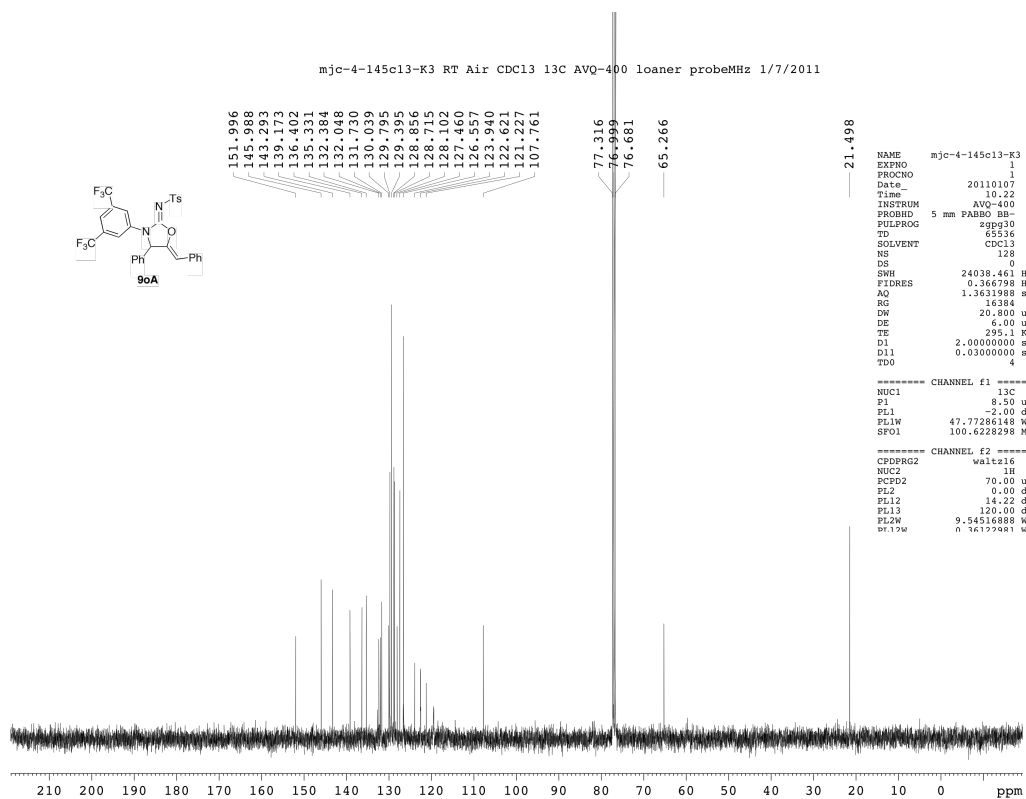

# <sup>1</sup>H NMR, <sup>13</sup>C NMR, <sup>19</sup>F NMR Spectra and HPLC Traces

mjc-4-145f19-K4 RT Air CDCl3 19F AVQ-400 loaner probeMHz 1/7/2011

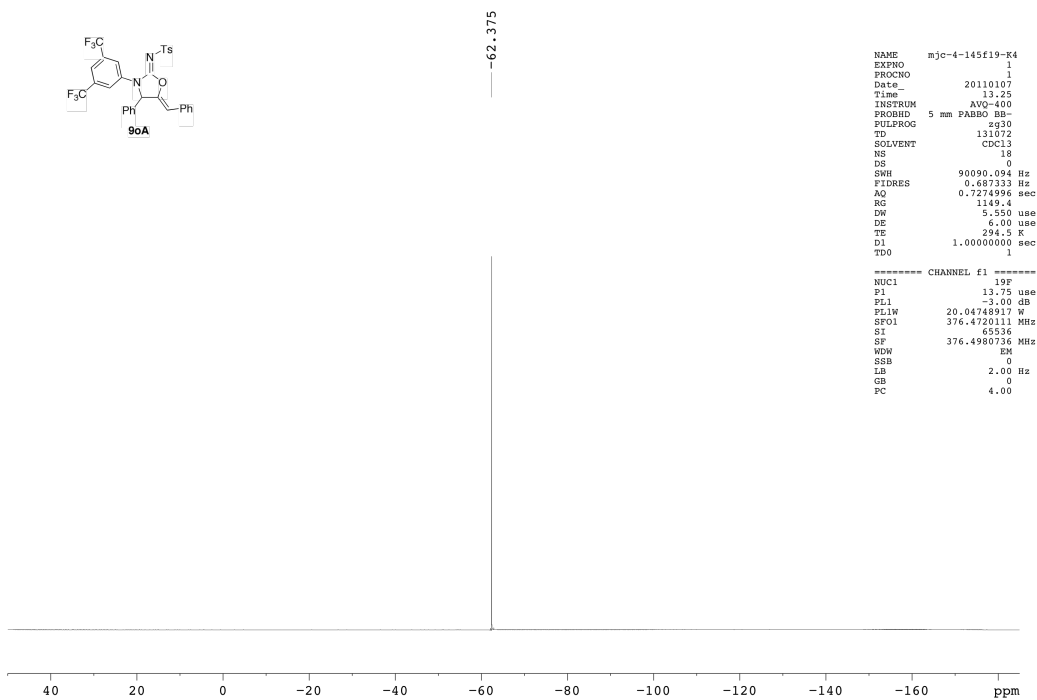

# <sup>1</sup>H NMR, <sup>13</sup>C NMR, <sup>19</sup>F NMR Spectra and HPLC Traces

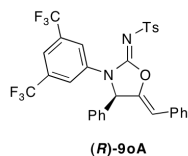

mjc-4-095-C  
C:\EZStart\Projects\Default\Data\Campbell\Published Traces\mjc-4-093-C  
IA8515IP\_30min.met9-23-2010 9-12-10 AM.dat

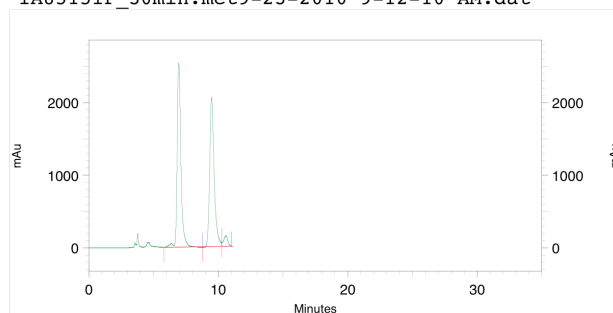

2: 239 nm, 4

nm Results

| Retention Time | Area     | Area Percent | Lambda Max |
|----------------|----------|--------------|------------|
| 6.948          | 51202459 | 49.521       | 219        |
| 9.484          | 48959176 | 47.351       | 214        |
| 10.588         | 3233856  | 3.128        | 209        |

mjc-4-165-J  
C:\EZStart\Projects\Default\Data\Campbell\Published Traces\mjc-4-165-J  
IA8515IP\_30min.met1-22-2011 5-41-33 PM.dat

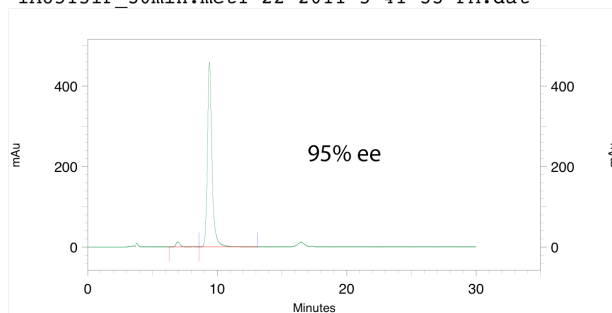

2: 239 nm, 4

nm Results

| Retention Time | Area     | Area Percent | Lambda Max |
|----------------|----------|--------------|------------|
| 6.964          | 266690   | 2.326        | 207        |
| 9.404          | 11198257 | 97.674       | 208        |



# <sup>1</sup>H NMR, <sup>13</sup>C NMR, <sup>19</sup>F NMR Spectra and HPLC Traces

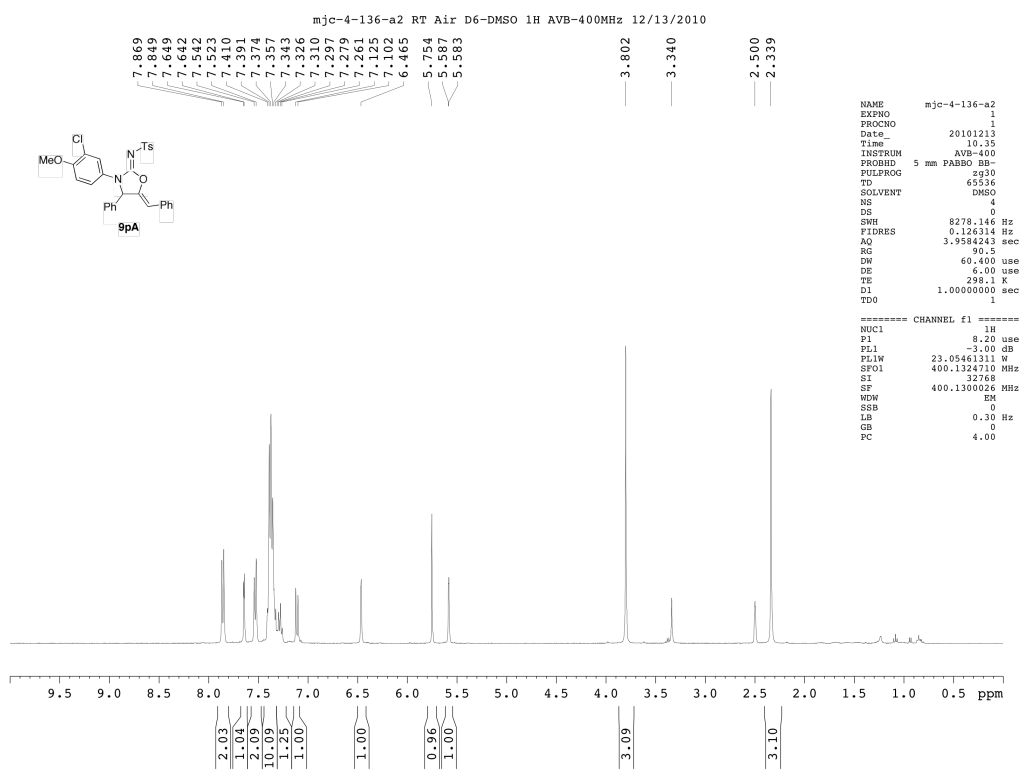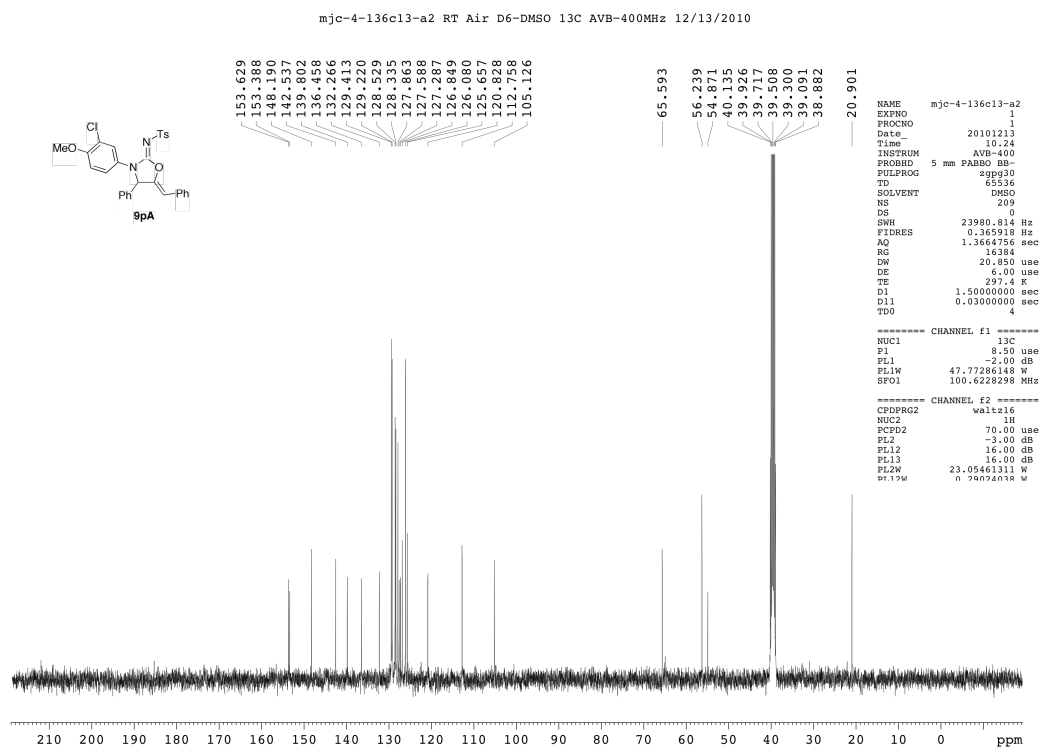

# <sup>1</sup>H NMR, <sup>13</sup>C NMR, <sup>19</sup>F NMR Spectra and HPLC Traces

mjc-4-145cosy-A5 RT Air d6-DMSO 1H-COSY DRX-500 zBBO probe 1/18/2011

2D gCOSY (128 exp., 1 scan each)  
 5 min 20 sec total time  
 ###don't forget to tune the probe (1H)

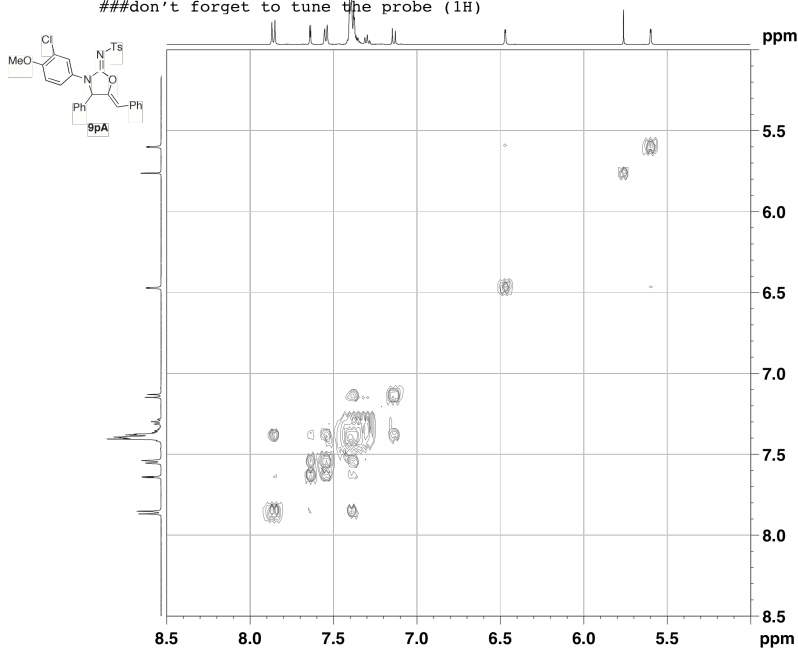

```

NAME      mjc-4-136cosy-A5
EXPNO     1
PROCNO    1
Date_     20110118
Time      13.13
INSTRUM   DRX-500
PROBHD    5 mm BBO BB-1H
PULPROG   cosygpsf
TD         2048
SOLVENT   CDCl3
NS         1
DS         16
SWH        7002.801 Hz
FIDRES     3.419337 Hz
AQ         0.1462772 sec
RG         812.7
DW         71.400 usec
DE         6.00 usec
TE         305.0 K
d0         0.00000300 sec
D1         2.00000000 sec
d13        0.00000400 sec
D16        0.00200000 sec
IN0        0.00014280 sec

===== CHANNEL f1 =====
NUC1       1H
P0         12.20 usec
P1         12.20 usec
PL1        -5.00 dB
SFO1       499.9230745 MHz

===== GRADIENT CHANNEL =====
GPNAM1     SINE.100
GPNAM2     SINE.100
GPZ1       10.00 %
GPZ2       10.00 %
P16        1000.00 usec
ND0         1
TD         128
SFO1       499.9231 MHz
FIDRES     54.709385 Hz
SW         14.008 ppm
FhMODE     QF
SI         1024
SF         499.9200000 MHz
WDW        SINE
SSB         0
LB         0.00 Hz
GB         0
PC         5.00
SI         512
MC2        QF
SF         499.9200000 MHz
WDW        SINE
SSB         0
LB         0.00 Hz
GB         0
    
```

mjc-4-145noesy-A5 RT Air d6-DMSO 1H-NOESY DRX-500 zBBO probe 1/18/2011

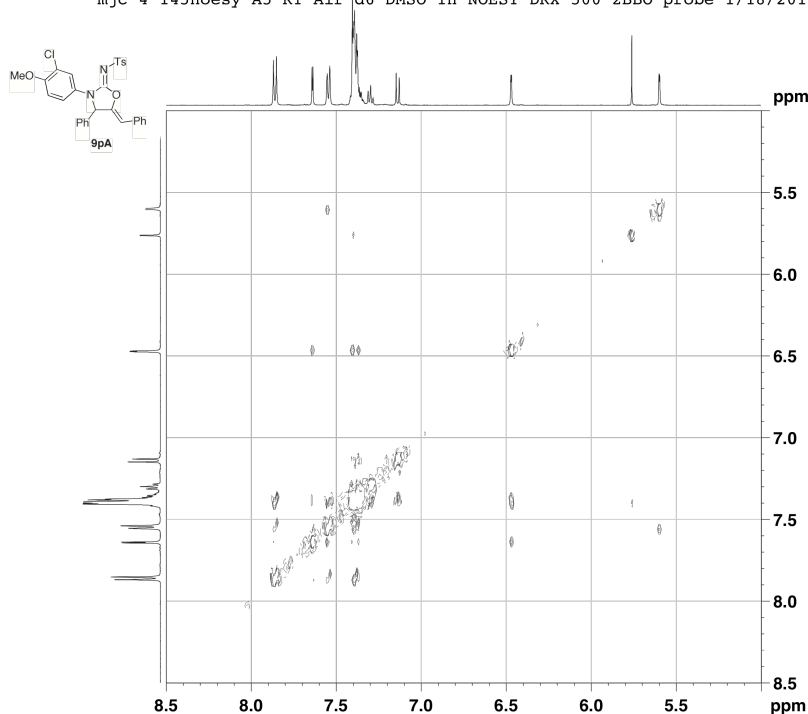

```

NAME      mjc-4-136noesy-A5
EXPNO     1
PROCNO    1
Date_     20110118
Time      13.19
INSTRUM   DRX-500
PROBHD    5 mm BBO BB-1H
PULPROG   noesygpsf
TD         2048
SOLVENT   CDCl3
NS         2
DS         4
SWH        5000.000 Hz
FIDRES     2.441406 Hz
AQ         0.2048500 sec
RG         362
DW         100.000 usec
DE         7.11 usec
TE         305.0 K
d0         0.00008447 sec
D1         1.00000000 sec
D8         0.69999999 sec
D16        0.00020000 sec
IN0        0.00020000 sec
TAU        0.34880000 sec

===== CHANNEL f1 =====
NUC1       1H
P1         12.20 usec
P2         24.40 usec
PL1        -5.00 dB
SFO1       499.9220497 MHz

===== GRADIENT CHANNEL =====
GPNAM1     SINE.100
GPNAM2     SINE.100
GPZ1       40.00 %
GPZ2       -40.00 %
P16        1000.00 usec
ND0         1
TD         256
SFO1       499.922 MHz
FIDRES     19.531250 Hz
SW         10.002 ppm
FhMODE     TPFI
SI         1024
SF         499.9200000 MHz
WDW        QSINE
SSB         2
LB         0.00 Hz
GB         0
PC         5.00
SI         256
MC2        TPFI
SF         499.9200000 MHz
WDW        QSINE
SSB         2
LB         0.00 Hz
GB         0
    
```

# <sup>1</sup>H NMR, <sup>13</sup>C NMR, <sup>19</sup>F NMR Spectra and HPLC Traces

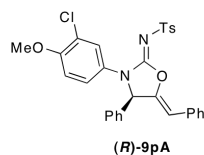

mjc-4-136-A  
C:\EZStart\Projects\Default\Data\Campbell\Published Traces\mjc-4-136-A  
IA6535IP\_60min.met12-15-2010 5-37-33 PM.dat

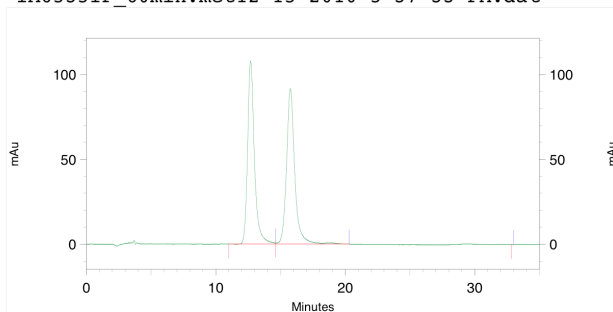

5: 287 nm, 4  
nm Results

| Retention Time | Area    | Area Percent | Lambda Max |
|----------------|---------|--------------|------------|
| 12.684         | 3968454 | 49.451       | 208        |
| 15.760         | 4055367 | 50.534       | 208        |

mjc-4-165-M  
C:\EZStart\Projects\Default\Data\Campbell\Published Traces\mjc-4-165-M  
IA6535IP\_30min.met1-24-2011 10-24-21 PM.dat

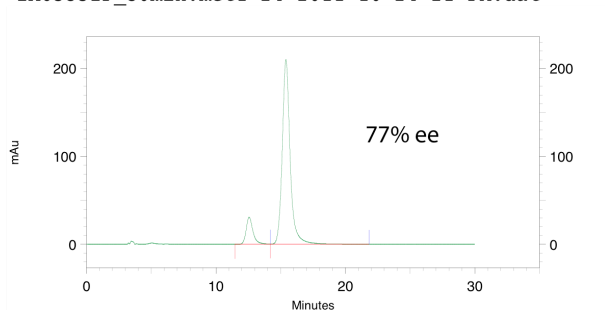

5: 287 nm, 4  
nm Results

| Retention Time | Area    | Area Percent | Lambda Max |
|----------------|---------|--------------|------------|
| 12.560         | 1146615 | 11.324       | 208        |
| 15.404         | 8979198 | 88.676       | 208        |

# <sup>1</sup>H NMR, <sup>13</sup>C NMR, <sup>19</sup>F NMR Spectra and HPLC Traces

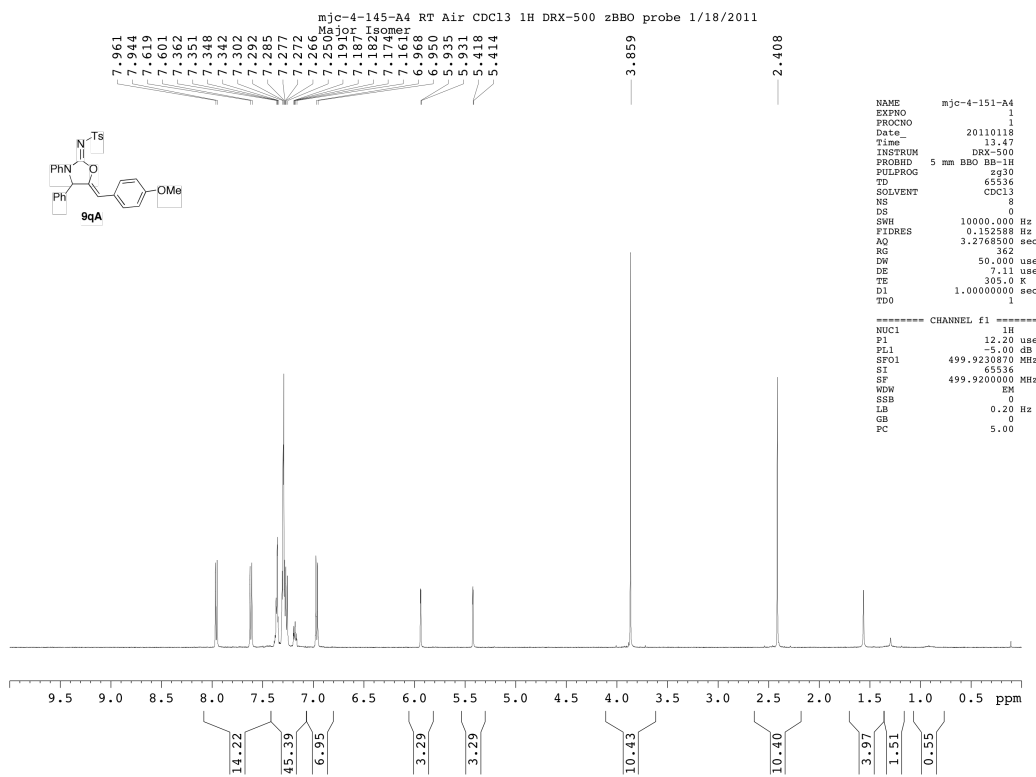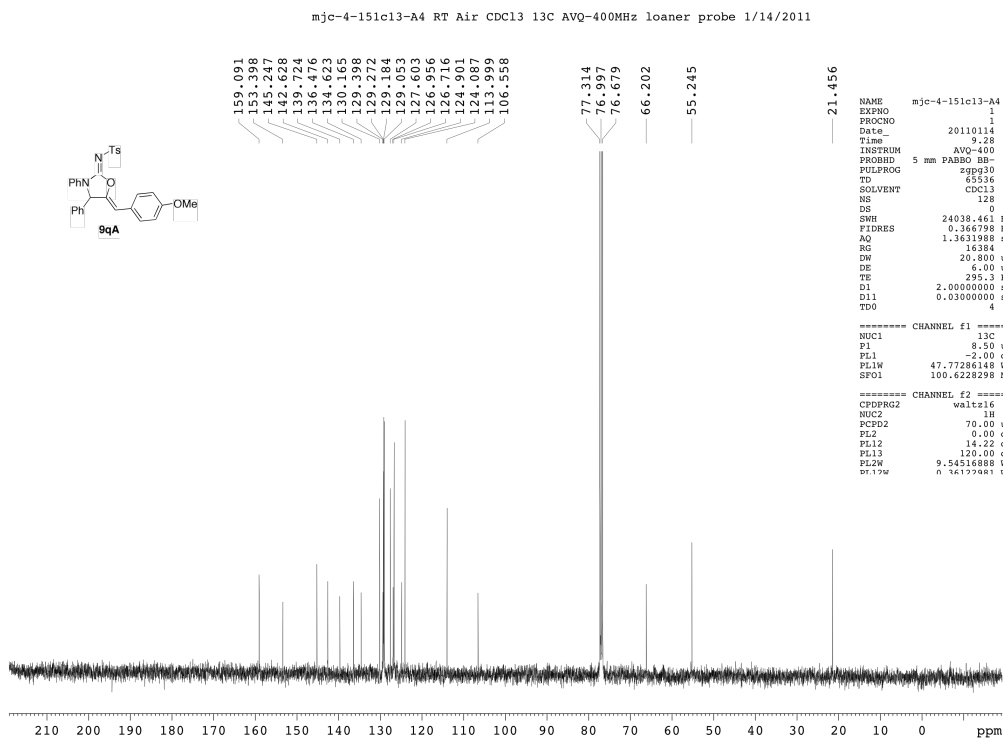

# <sup>1</sup>H NMR, <sup>13</sup>C NMR, <sup>19</sup>F NMR Spectra and HPLC Traces

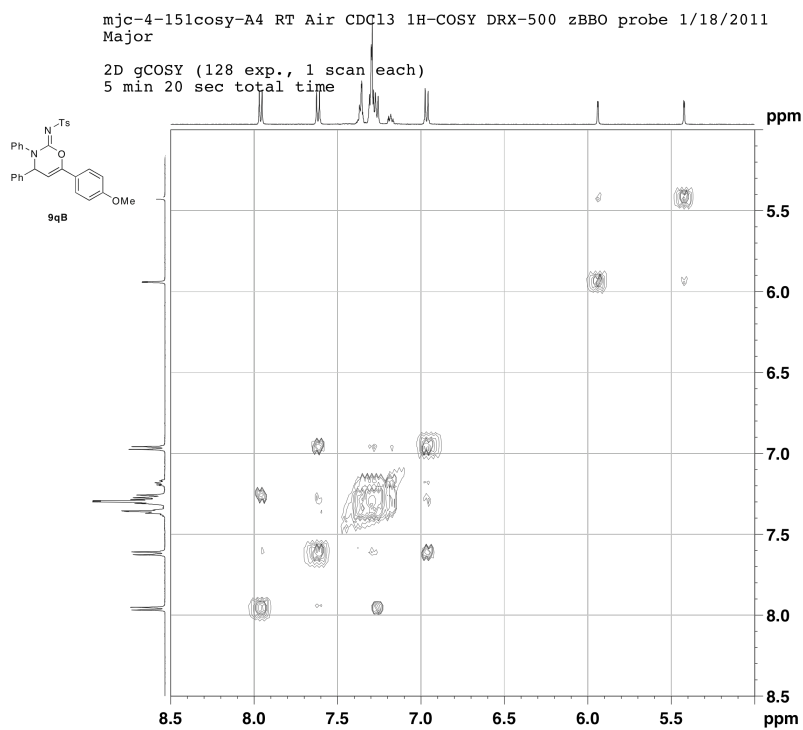

```

NAME      mjc-4-151cosy-A4
EXPNO    1
PROCNO   1
Date_    20110118
Time     13.48
INSTRUM  DRX-500
PROBHD   5 mm BBO BB-1H
PULPROG  cosygpqf
TD       2048
SOLVENT  CDCl3
NS       1
DS       16
SWH      7002.801 Hz
FIDRES   3.419337 Hz
AQ       0.1462772 sec
RG       812.7
DW       71.400 usec
DE       6.00 usec
TE       305.0 K
d0       0.00000300 sec
d1       2.00000000 sec
d13      0.00000400 sec
d16      0.00020000 sec
IN0      0.00014280 sec

===== CHANNEL f1 =====
NUC1     1H
P0       12.20 usec
P1       12.20 usec
PL1      -5.00 dB
SFO1    499.9230745 MHz

===== GRADIENT CHANNEL =====
GPNAM1   SINE.100
GPNAM2   SINE.100
GPZ1     10.00 %
GPZ2     10.00 %
P16      1000.00 usec
ND0      1
TD       128
SFO1    499.9231 MHz
FIDRES   54.709385 Hz
SW       14.008 ppm
FhMODE   QF
SI       1024
SF       499.9200000 MHz
WDW      SINE
SSB      0
LB       0.00 Hz
GB       0
PC       1.40
SI       512
MC2      QF
SF       499.9200000 MHz
WDW      SINE
SSB      0
LB       0.00 Hz
GB       0
    
```

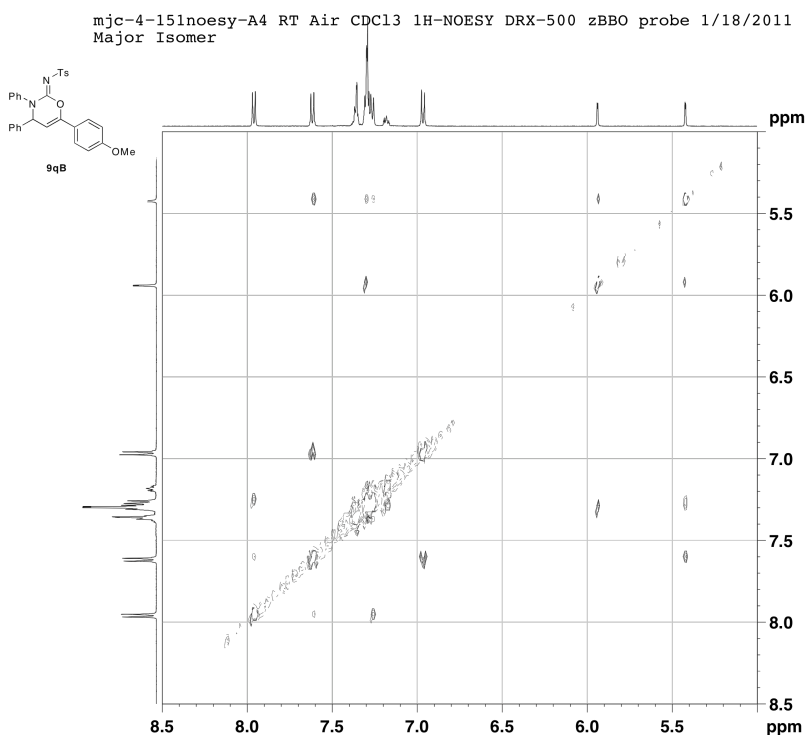

```

NAME      mjc-4-151noesy-A4
EXPNO    1
PROCNO   1
Date_    20110118
Time     13.54
INSTRUM  DRX-500
PROBHD   5 mm BBO BB-1H
PULPROG  noesygpgf
TD       2048
SOLVENT  CDCl3
NS       2
DS       4
SWH      5000.000 Hz
FIDRES   2.441406 Hz
AQ       0.2048500 sec
RG       456.1
DW       100.000 usec
DE       7.11 usec
TE       305.0 K
d0       0.0003447 sec
d1       1.00000000 sec
d8       0.69999999 sec
d16      0.00020000 sec
IN0      0.00020000 sec
TAU      0.34880000 sec

===== CHANNEL f1 =====
NUC1     1H
P1       12.20 usec
P2       24.40 usec
PL1      -5.00 dB
SFO1    499.9220497 MHz

===== GRADIENT CHANNEL =====
GPNAM1   SINE.100
GPNAM2   SINE.100
GPZ1     40.00 %
GPZ2    -40.00 %
P16      1000.00 usec
ND0      1
TD       256
SFO1    499.922 MHz
FIDRES   19.531250 Hz
SW       10.002 ppm
FhMODE   TPFI
SI       1024
SF       499.9200000 MHz
WDW      QSINE
SSB      2
LB       0.00 Hz
GB       0
PC       5.00
SI       256
MC2      TPFI
SF       499.9200000 MHz
WDW      QSINE
SSB      2
LB       0.00 Hz
GB       0
    
```

# <sup>1</sup>H NMR, <sup>13</sup>C NMR, <sup>19</sup>F NMR Spectra and HPLC Traces

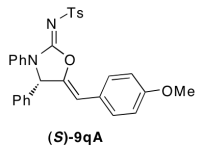

mjc-4-105-A-rac  
C:\EZStart\Projects\Default\Data\Campbell\Published Traces\mjc-4-105-A-rac  
IA6535IP\_60min.met9-28-2010 2-31-05 PM.dat

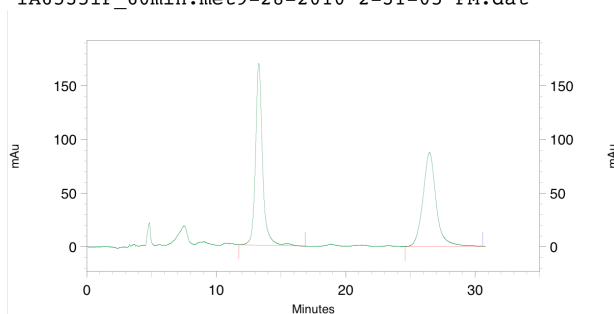

5: 287 nm, 4

nm Results

| Retention Time | Area    | Area Percent | Lambda Max |
|----------------|---------|--------------|------------|
| 13.288         | 6472920 | 51.253       | 208        |
| 26.476         | 6156496 | 48.747       | 208        |

mjc-4-105-A  
C:\EZStart\Projects\Default\Data\Campbell\Published Traces\mjc-4-105-A  
IA6535IP\_60min.met9-28-2010 4-55-48 PM.dat

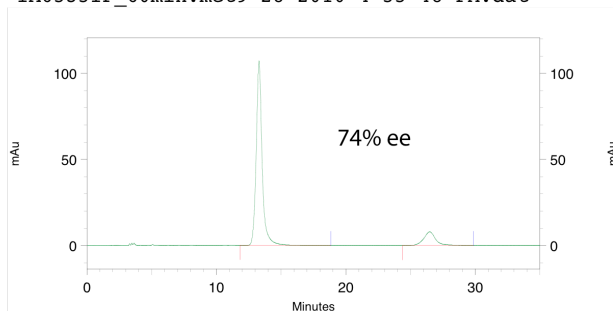

5: 287 nm, 4

nm Results

| Retention Time | Area    | Area Percent | Lambda Max |
|----------------|---------|--------------|------------|
| 13.296         | 3424982 | 86.833       | 208        |
| 26.472         | 519369  | 13.167       | 208        |

# <sup>1</sup>H NMR, <sup>13</sup>C NMR, <sup>19</sup>F NMR Spectra and HPLC Traces

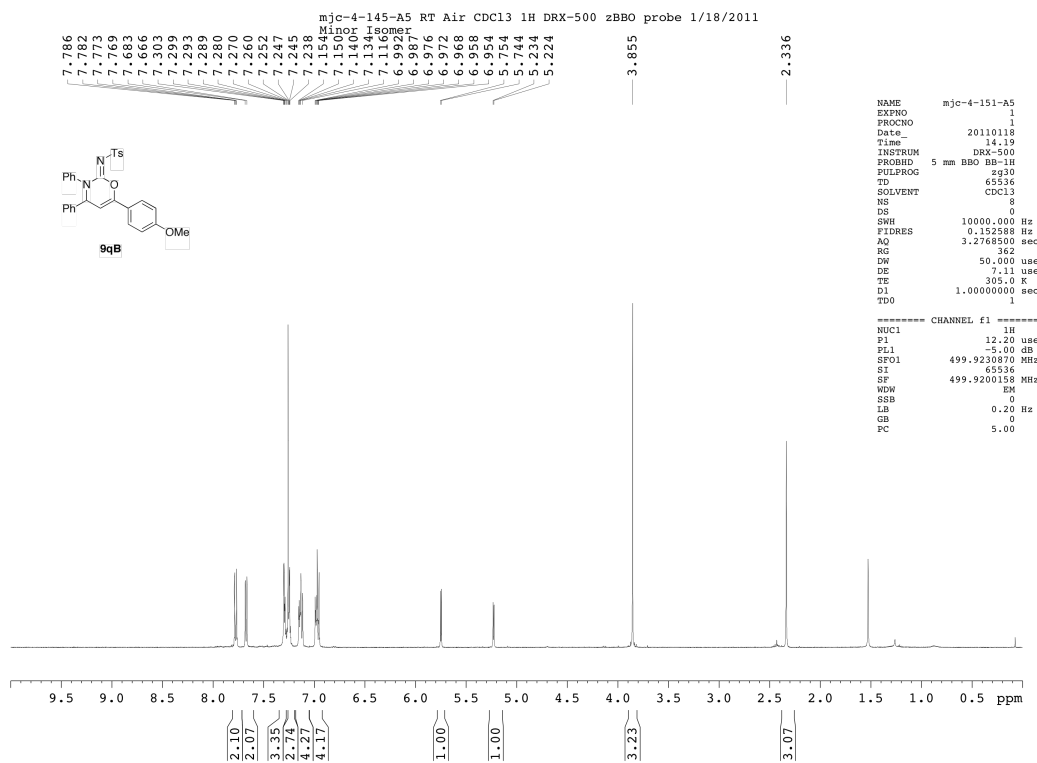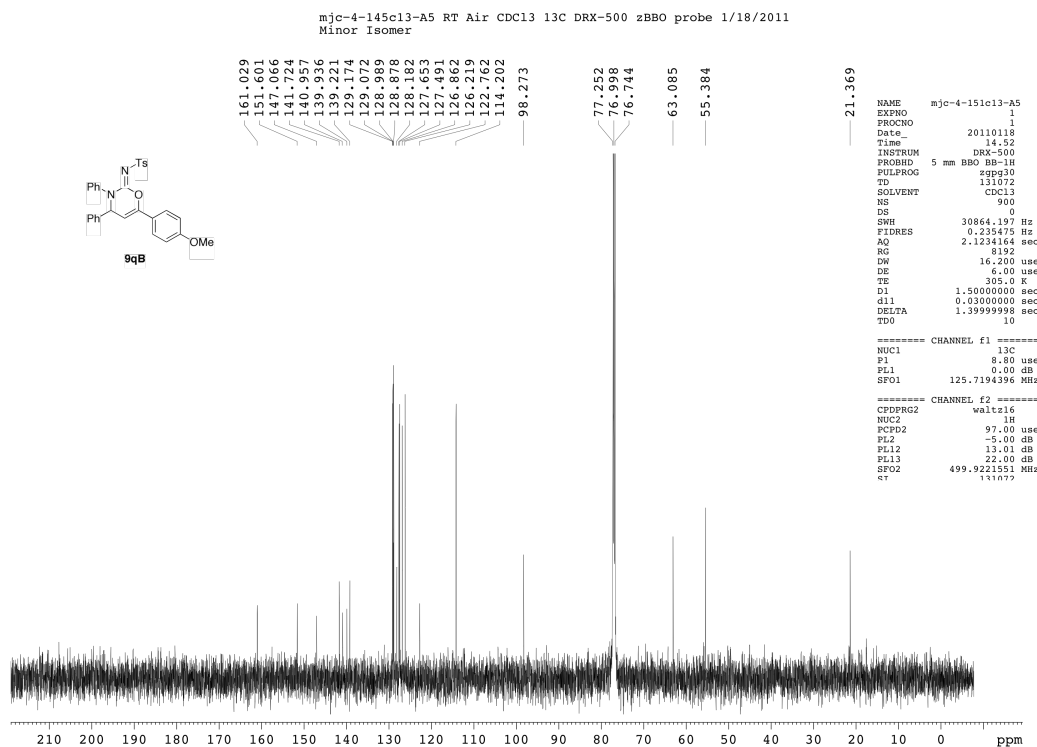

# <sup>1</sup>H NMR, <sup>13</sup>C NMR, <sup>19</sup>F NMR Spectra and HPLC Traces

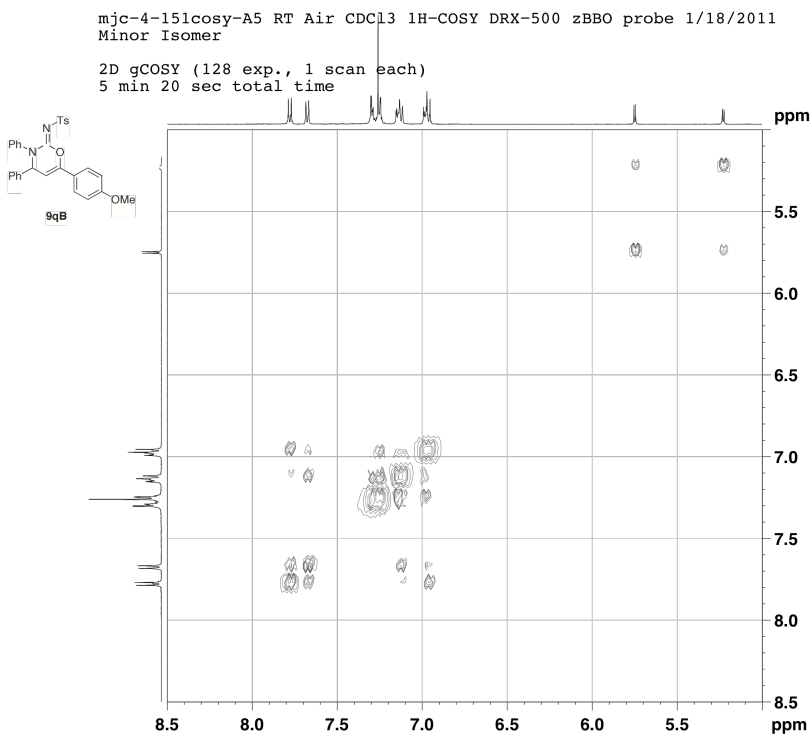

```

NAME      mjc-4-151cosy-A5
EXPNO    1
PROCNO   1
Date_    20110118
Time     14.21
INSTRUM  DRX-500
PROBHD   5 mm BBO BB-1H
PULPROG  cosygpqf
TD        2048
SOLVENT  cdcl3
NS        1
DS        16
SWH       7002.801 Hz
FIDRES   3.419337 Hz
AQ        0.1462772 sec
RG        812.7
DW        71.400 usec
DE        6.00 usec
TE        305.0 K
d0        0.00000300 sec
D1        2.00000000 sec
d13       0.00000400 sec
D16       0.00020000 sec
IN0       0.00014280 sec

===== CHANNEL f1 =====
NUC1      1H
P0        12.20 usec
P1        12.20 usec
PL1       -5.00 dB
SFO1      499.9230745 MHz

===== GRADIENT CHANNEL =====
GPNAM1    SINE.100
GPNAM2    SINE.100
GP1        10.00 %
GP2        10.00 %
P16        1000.00 usec
ND0        1
TD         128
SFO1      499.9231 MHz
FIDRES    54.709385 Hz
SW         14.008 ppm
FnMODE     QF
SI         1024
SF         499.920155 MHz
WDW        SINE
SSB         0
LB         0.00 Hz
GB         0
PC         1.40
SI         512
MC2        QF
SF         499.9200188 MHz
WDW        SINE
SSB         0
LB         0.00 Hz
GB         0
    
```

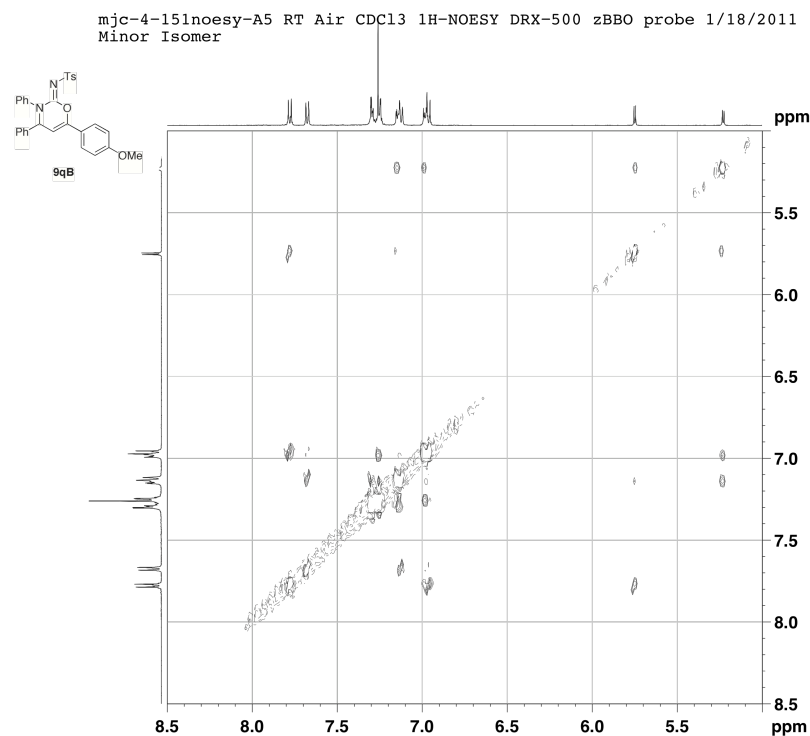

```

NAME      mjc-4-151noesy-A5
EXPNO    1
PROCNO   1
Date_    20110118
Time     14.28
INSTRUM  DRX-500
PROBHD   5 mm BBO BB-1H
PULPROG  noesygpqh
TD        2048
SOLVENT  cdcl3
NS        2
DS        4
SWH       5000.000 Hz
FIDRES    2.441406 Hz
AQ        0.2048500 sec
RG        645.1
DW        100.000 usec
DE        7.11 usec
TE        305.0 K
d0        0.00008447 sec
D1        1.00000000 sec
D8        0.69999999 sec
D16       0.00020000 sec
IN0       0.00020000 sec
TAU       0.34880000 sec

===== CHANNEL f1 =====
NUC1      1H
P1        12.20 usec
P2        24.40 usec
PL1       -5.00 dB
SFO1      499.9220497 MHz

===== GRADIENT CHANNEL =====
GPNAM1    SINE.100
GPNAM2    SINE.100
GP1        40.00 %
GP2        40.00 %
P16        1000.00 usec
ND0        1
TD         256
SFO1      499.922 MHz
FIDRES    19.531250 Hz
SW         10.002 ppm
FnMODE     TPPI
SI         1024
SF         499.920128 MHz
WDW        QSINE
SSB         2
LB         0.00 Hz
GB         0
PC         5.00
SI         256
MC2        TPPI
SF         499.9200150 MHz
WDW        QSINE
SSB         2
LB         0.00 Hz
GB         0
    
```



# <sup>1</sup>H NMR, <sup>13</sup>C NMR, <sup>19</sup>F NMR Spectra and HPLC Traces

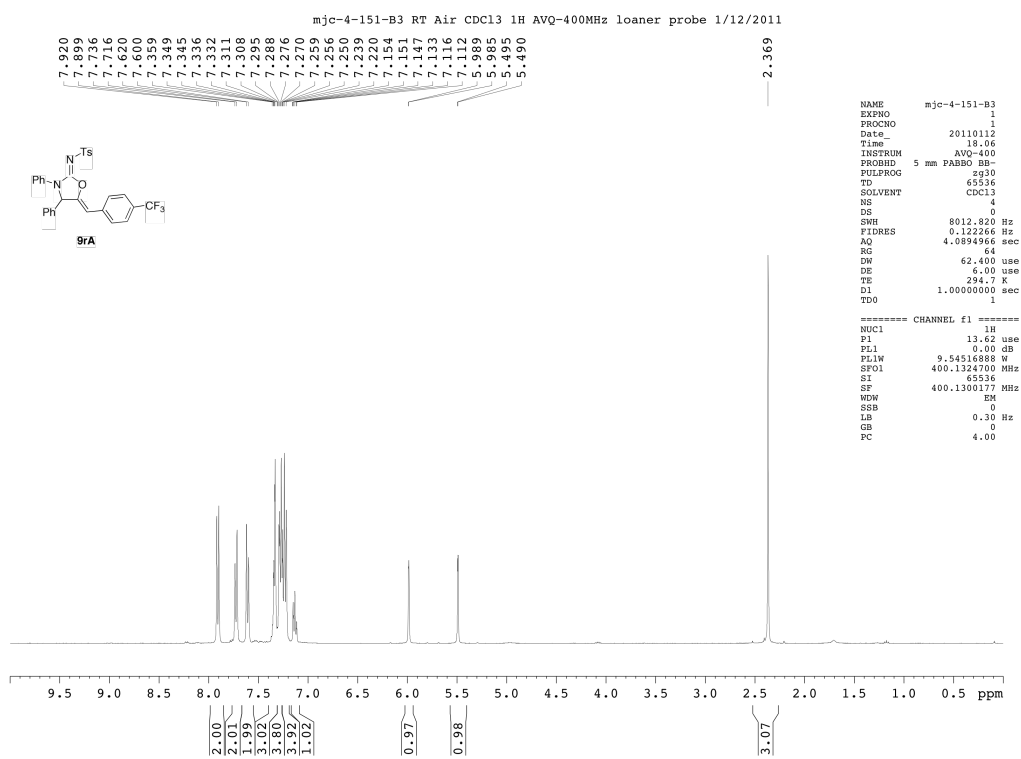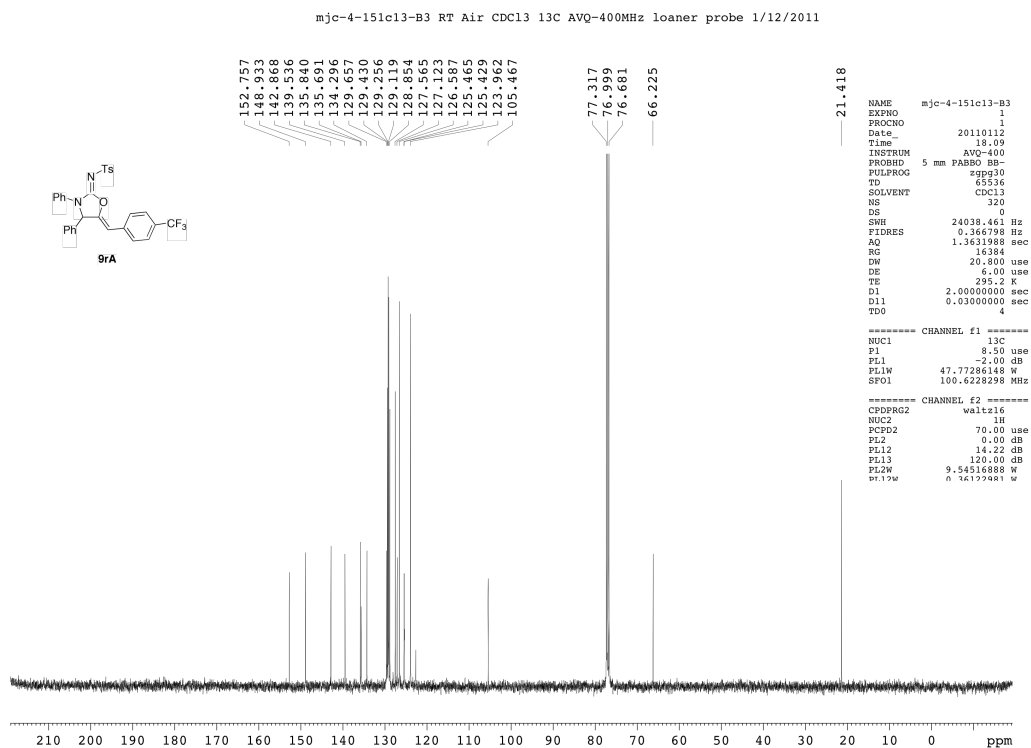

# <sup>1</sup>H NMR, <sup>13</sup>C NMR, <sup>19</sup>F NMR Spectra and HPLC Traces

mjc-4-151f19-B2 RT Air CDCl<sub>3</sub> 19F AVQ-400MHz loaner probe 1/12/2011

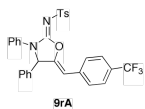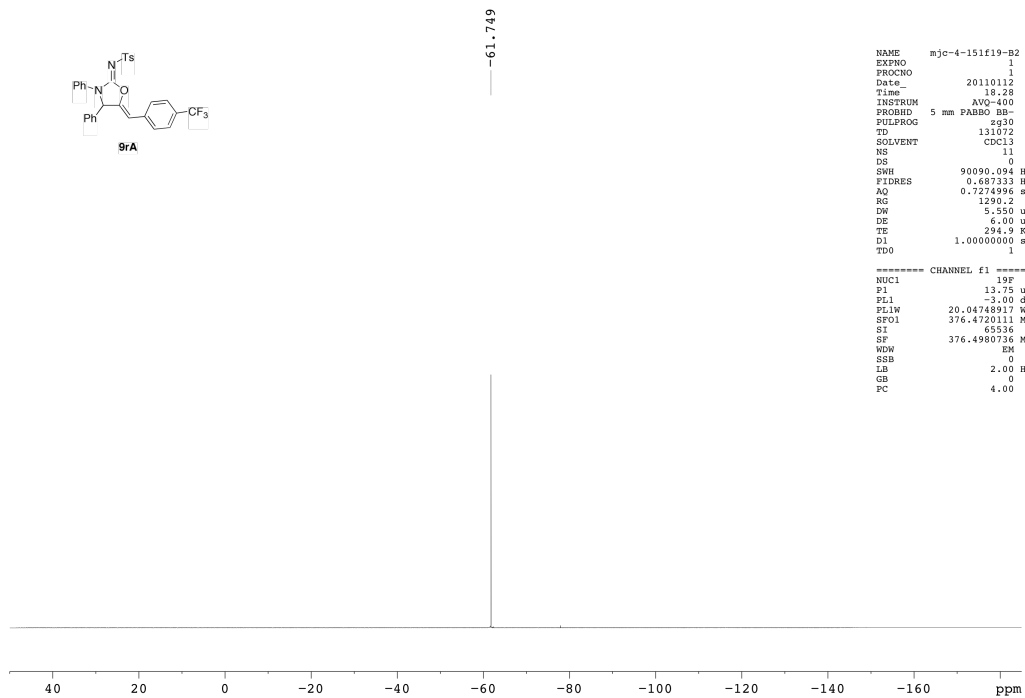

```
NAME mjc-4-151f19-B2
EXPNO 1
PROCNO 1
Date_ 20110112
Time 18.28
INSTRUM AVQ-400
PROBHD 5 mm PABBO BB-
PULPROG zg30
TD 131072
SOLVENT CDCl3
NS 11
DS 0
SWH 90090.094 Hz
FIDRES 0.687333 Hz
AQ 0.7274996 sec
RG 1290.2
RW 5.550 use
DE 6.00 use
TE 294.9 K
D1 1.00000000 sec
TDO 1

===== CHANNEL f1 =====
NUC1 19F
P1 13.75 use
PL1 -3.00 dB
PLW 20.04748917 W
SFO1 376.4720111 MHz
SI 65536
SF 376.4980736 MHz
WDW EM
SSB 0
LB 2.00 Hz
GB 0
PC 4.00
```

# <sup>1</sup>H NMR, <sup>13</sup>C NMR, <sup>19</sup>F NMR Spectra and HPLC Traces

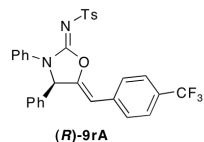

mjc-4-105-B-rac  
C:\EZStart\Projects\Default\Data\Campbell\Published Traces\mjc-4-105-B-rac  
IA6535IP\_60min.met9-28-2010 3-03-37 PM.dat

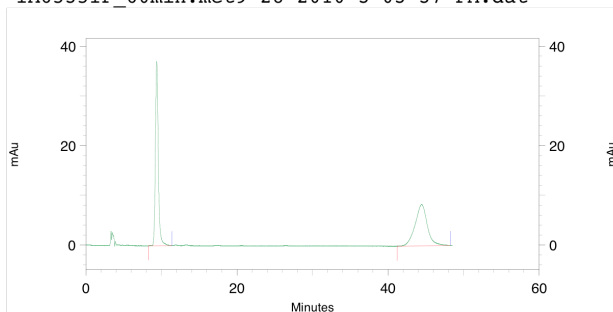

5: 287 nm, 4

nm Results

| Retention Time | Area   | Area Percent | Lambda Max |
|----------------|--------|--------------|------------|
| 9.368          | 983487 | 51.251       | 207        |
| 44.452         | 935462 | 48.749       | 208        |

mjc-4-160-C  
C:\EZStart\Projects\Default\Data\Campbell\mjc-4-160-C  
IA6535IP\_60min.met1-25-2011 3-55-44 PM.dat

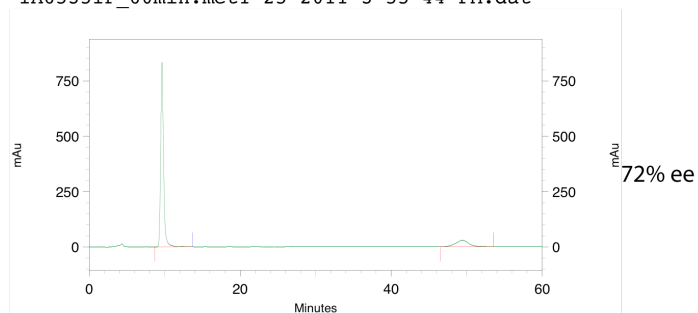

5: 287 nm, 4

nm Results

| Retention Time | Area     | Area Percent | Lambda Max |
|----------------|----------|--------------|------------|
| 9.640          | 22204639 | 86.223       | 207        |
| 49.448         | 3548072  | 13.777       | 207        |

# <sup>1</sup>H NMR, <sup>13</sup>C NMR, <sup>19</sup>F NMR Spectra and HPLC Traces

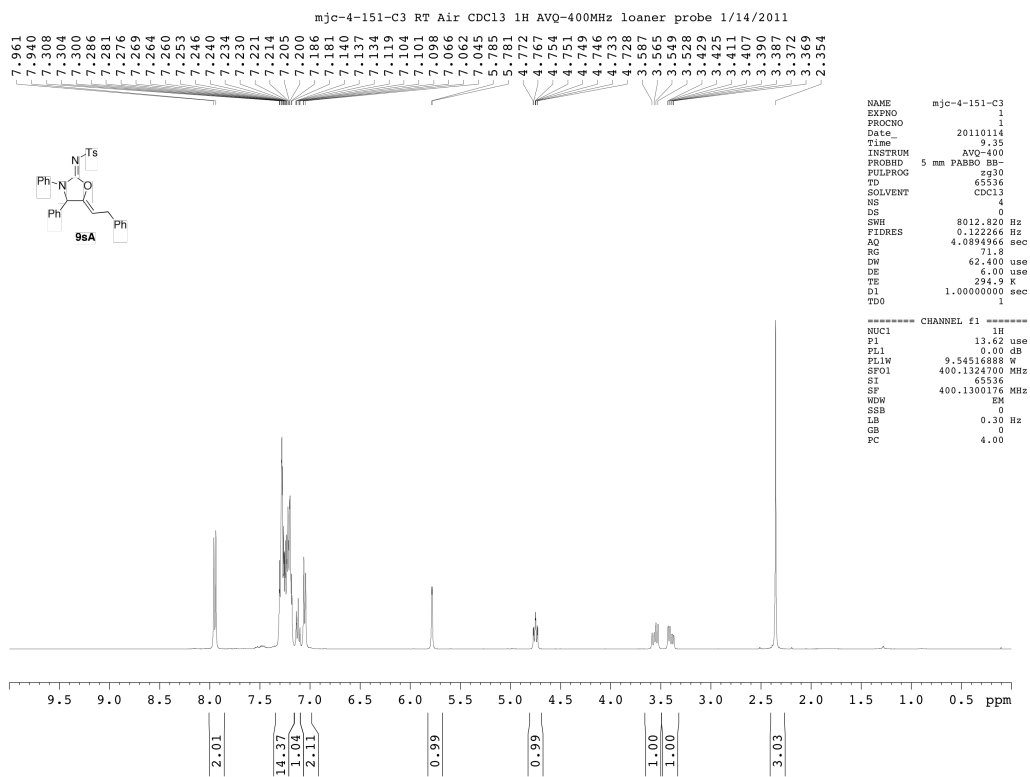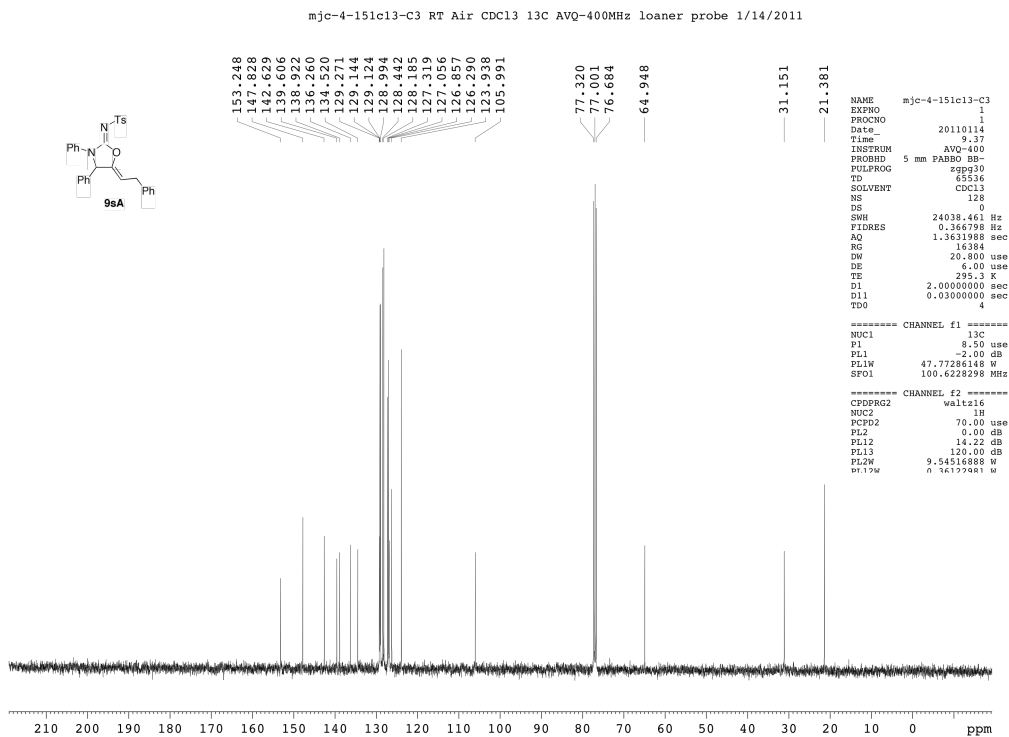

# <sup>1</sup>H NMR, <sup>13</sup>C NMR, <sup>19</sup>F NMR Spectra and HPLC Traces

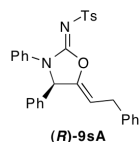

mjc-4-105-C-rac  
C:\EZStart\Projects\Default\Data\Campbell\Published Traces\mjc-4-105-C-rac  
IB7525IP\_60min.met9-29-2010 12-19-00 PM.dat

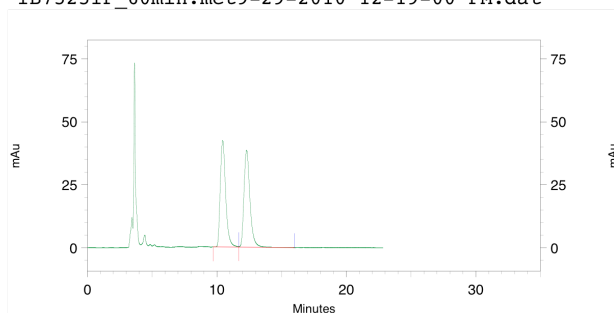

2: 239 nm, 4

nm Results

| Retention Time | Area    | Area Percent | Lambda Max |
|----------------|---------|--------------|------------|
| 10.452         | 1223322 | 49.884       | 208        |
| 12.300         | 1229016 | 50.116       | 208        |

mjc-4-160-D  
C:\EZStart\Projects\Default\Data\Campbell\mjc-4-160-D  
IB7525IP\_30min.met1-25-2011 5-58-41 PM.dat

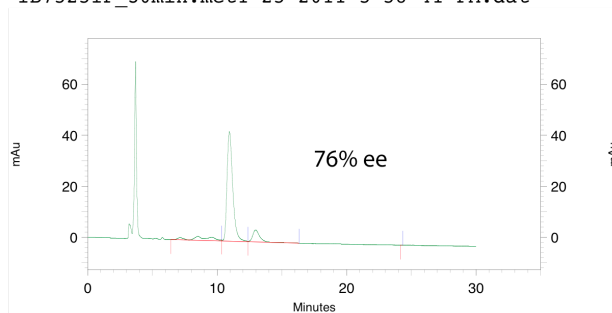

2: 239 nm, 4

nm Results

| Retention Time | Area    | Area Percent | Lambda Max |
|----------------|---------|--------------|------------|
| 8.528          | 150646  | 9.173        | 223        |
| 10.944         | 1313897 | 80.009       | 207        |
| 12.972         | 177485  | 10.808       | 206        |

# <sup>1</sup>H NMR, <sup>13</sup>C NMR, <sup>19</sup>F NMR Spectra and HPLC Traces

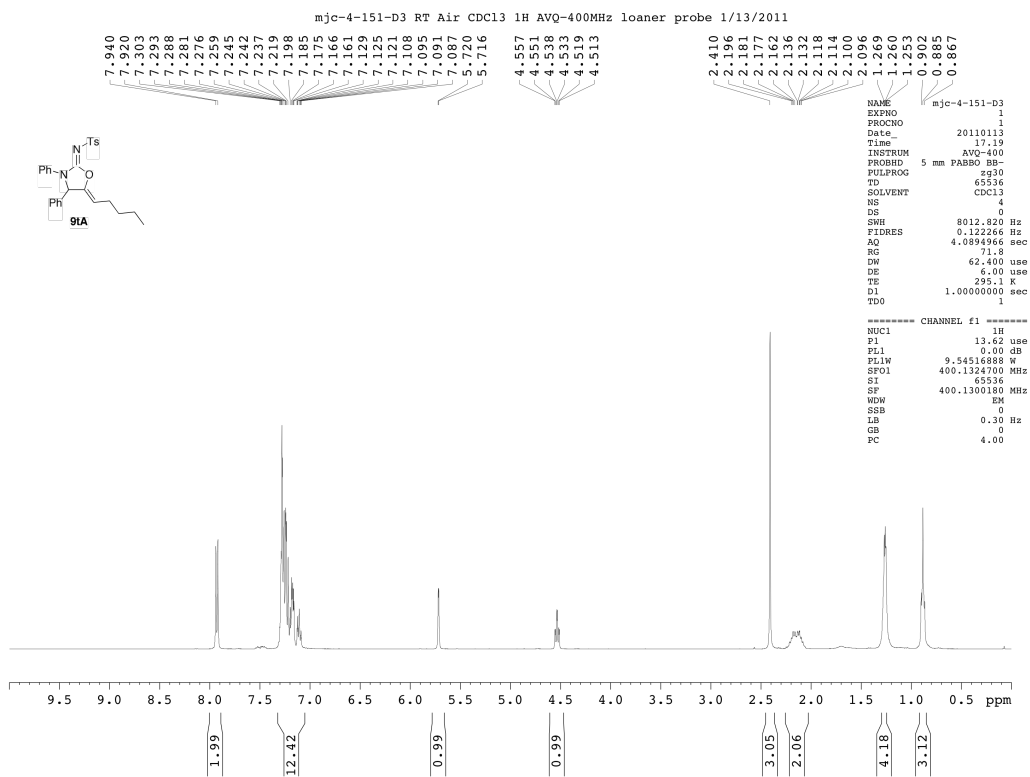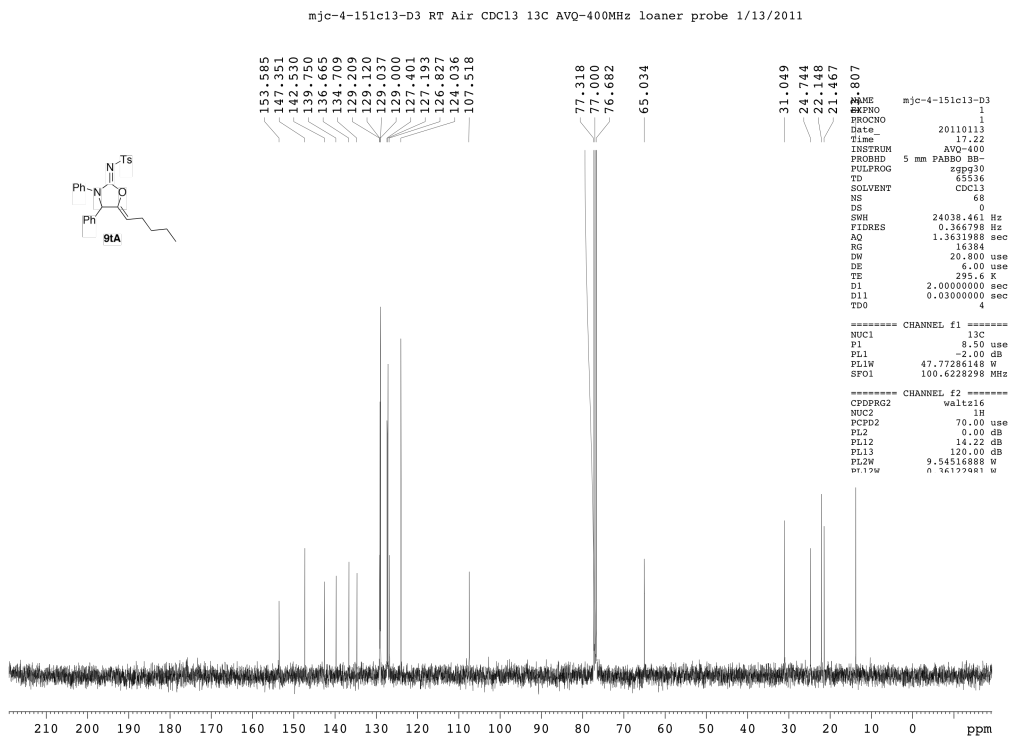

# $^1\text{H}$ NMR, $^{13}\text{C}$ NMR, $^{19}\text{F}$ NMR Spectra and HPLC Traces

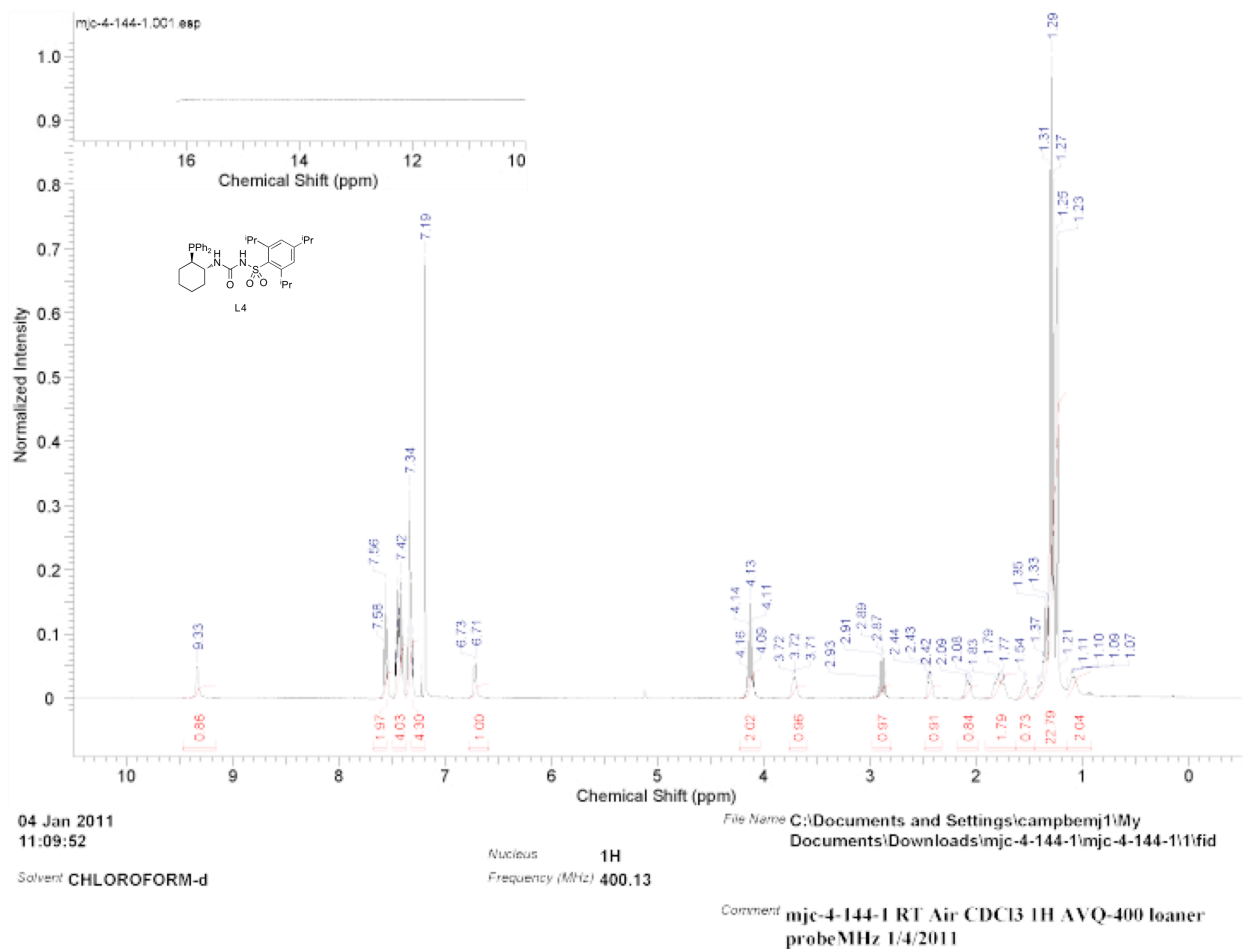

# <sup>1</sup>H NMR, <sup>13</sup>C NMR, <sup>19</sup>F NMR Spectra and HPLC Traces

4/19/2011 2 23:17 PM

|                        |                                                                                                |                        |                                                                  |                      |                       |                       |          |
|------------------------|------------------------------------------------------------------------------------------------|------------------------|------------------------------------------------------------------|----------------------|-----------------------|-----------------------|----------|
| Acquisition Time (sec) | 1.3631                                                                                         | Comment                | myc-4-144c13-1 RT Air CDCl3 13C AVO-400 loaner probeMHz 1/4/2011 |                      |                       |                       |          |
| Date                   | 04 Jan 2011 11:09:52                                                                           | Date Stamp             | 04 Jan 2011 11:09:52                                             |                      |                       |                       |          |
| File Name              | C:\Documents and Settings\campbenj1\My Documents\Downloads\myc-4-144c13-1\myc-4-144c13-1\1\fid | Frequency (MHz)        | 100.62                                                           |                      | Original Points Count | 32768                 |          |
| Nucleus                | 13C                                                                                            | Number of Transients   | 128                                                              | Origin               | AVO-400               | Original Points Count | 32768    |
| Owner                  | user                                                                                           | Points Count           | 32768                                                            | Pulse Sequence       | zgpg30                | Receiver Gain         | 16384.00 |
| SW (cyclical) (Hz)     | 24038.46                                                                                       | Solvent                | CHLOROFORM-d                                                     | Spectrum Offset (Hz) | 10260.7998            | Spectrum Type         | STANDARD |
| Sweep Width (Hz)       | 24037.73                                                                                       | Temperature (degree C) | 21.300                                                           |                      |                       |                       |          |

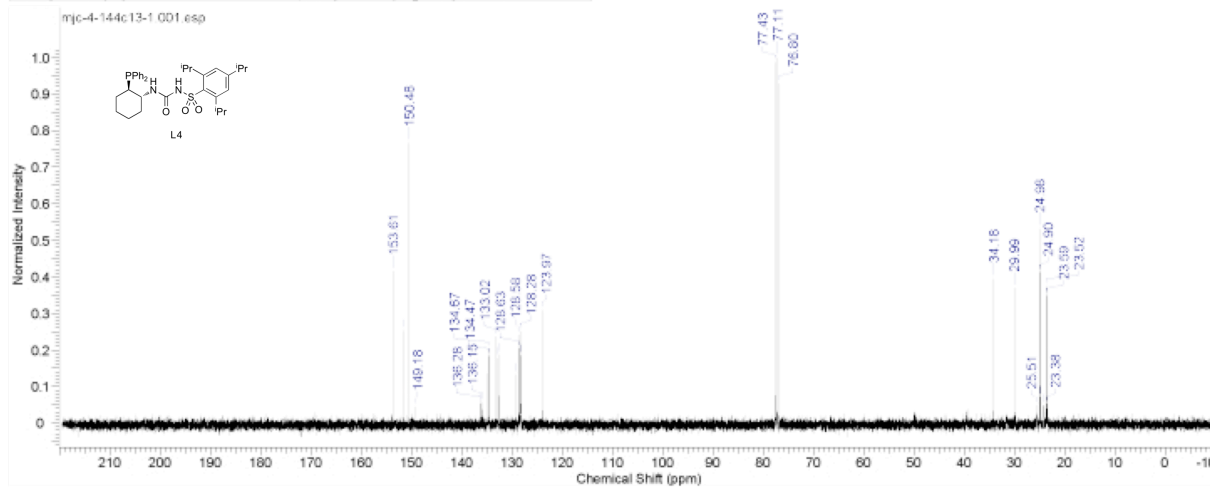

C:\Documents and Settings\campbenj1\My Documents\Downloads\myc-4-144c13-1\myc-4-144c13-1\myc-4-144c13-1 001.esp



# $^1\text{H}$ NMR, $^{13}\text{C}$ NMR, $^{19}\text{F}$ NMR Spectra and HPLC Traces

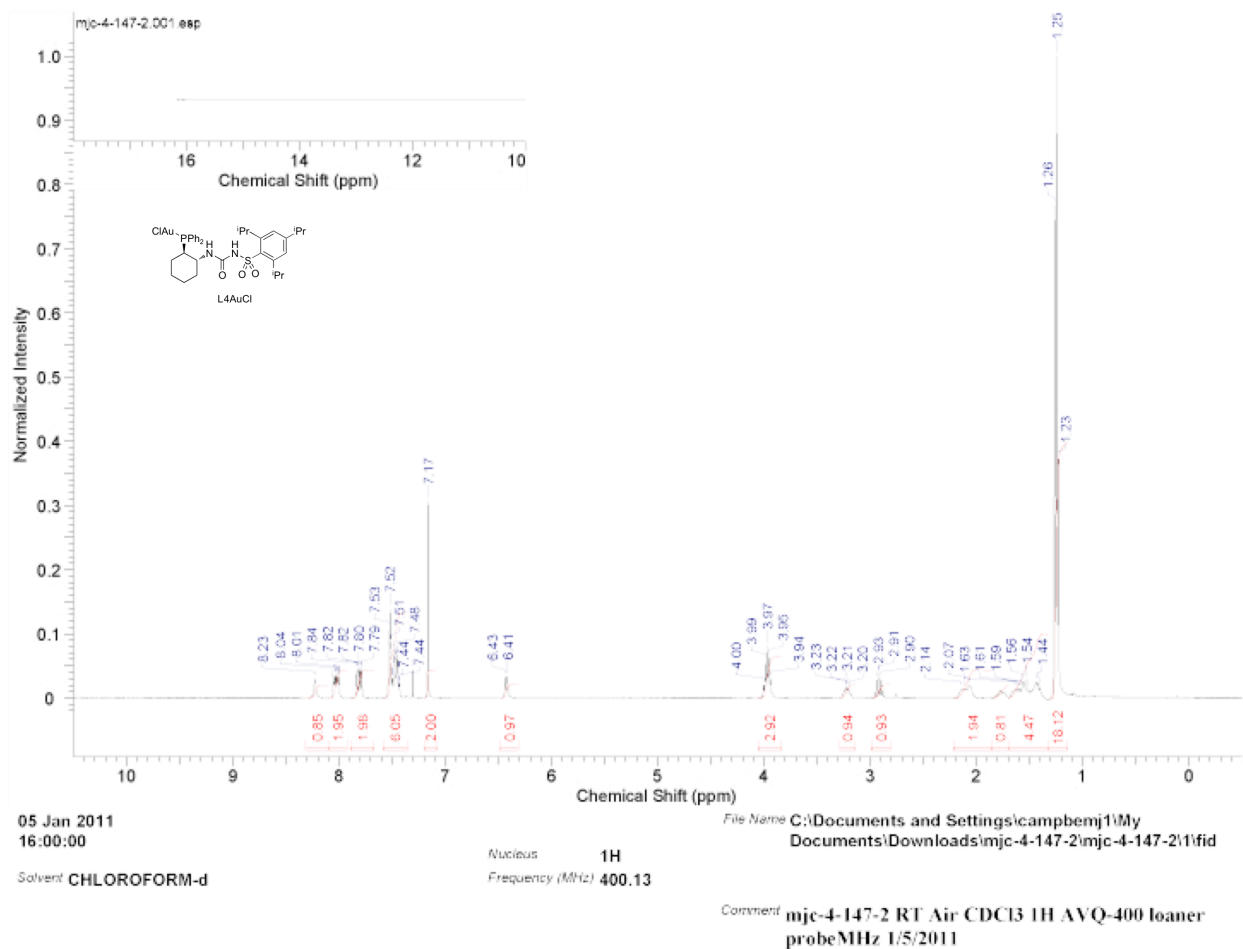

# $^1\text{H}$ NMR, $^{13}\text{C}$ NMR, $^{19}\text{F}$ NMR Spectra and HPLC Traces

4/19/2011 2:27:27 PM

|                        |                                                                                                |                        |                                                                  |                       |            |
|------------------------|------------------------------------------------------------------------------------------------|------------------------|------------------------------------------------------------------|-----------------------|------------|
| Acquisition Time (sec) | 1.3631                                                                                         | Comment                | myc-4-147c13-2 RT Air CDCl3 13C AVQ-400 loaner probeMHz 1/5/2011 |                       |            |
| Date                   | 05 Jan 2011 16:04:16                                                                           | Date Stamp             | 05 Jan 2011 16:04:16                                             |                       |            |
| File Name              | C:\Documents and Settings\campbenj1\My Documents\Downloads\myc-4-147c13-2\myc-4-147c13-2\1\fid | Frequency (MHz)        | 100.62                                                           |                       |            |
| Nucleus                | $^{13}\text{C}$                                                                                | Number of Transients   | 126                                                              | Original Points Count | 32768      |
| Owner                  | user                                                                                           | Points Count           | 32768                                                            | Pulse Sequence        | zgpg30     |
| SW (cyclical) (Hz)     | 24038.46                                                                                       | Solvent                | CHLOROFORM-d                                                     | Spectrum Offset (Hz)  | 10260.7998 |
| Sweep Width (Hz)       | 24037.73                                                                                       | Temperature (degree C) | 21.700                                                           | Spectrum Type         | STANDARD   |

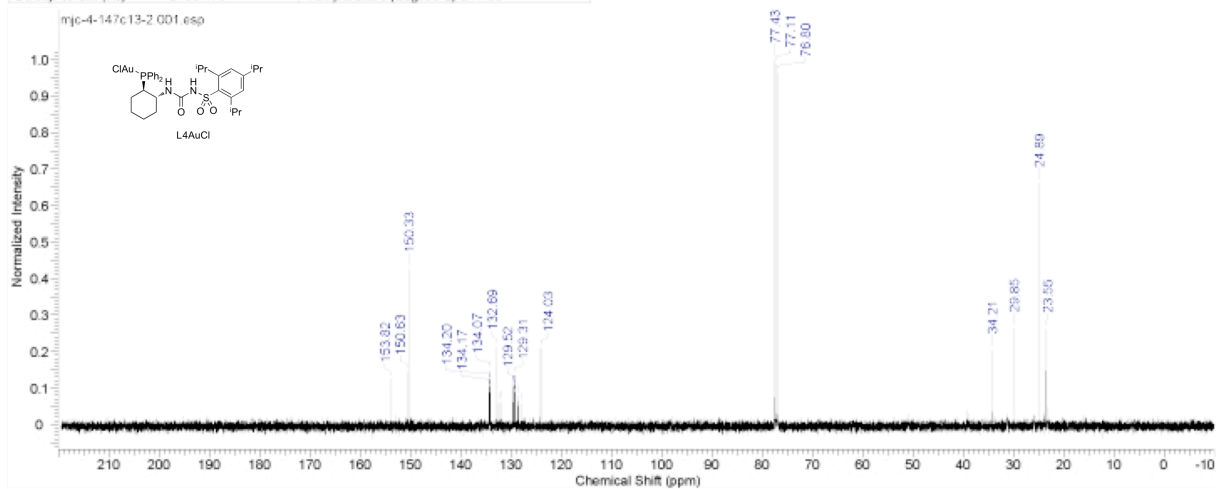

C:\Documents and Settings\campbenj1\My Documents\Downloads\myc-4-147c13-2\myc-4-147c13-2\myc-4-147c13-2 001.esp
